# Supplementary material for: In Vitro Identification of Phosphorylation Sites on TcPolβ by Protein Kinases TcCK1, TcCK2, TcAUK1, and TcPKC1 and Effect of Phorbol Ester on Activation by TcPKC of TcPolβ in Trypanosoma cruzi Epimastigotes
Source: Microorganisms. 2024 Apr 30;12(5):907. doi: 10.3390/microorganisms12050907 (PMC11124317; doi:10.3390/microorganisms12050907)
Supplement: Supplementary file 1 [file microorganisms-12-00907-s001.zip › Table S1.xlsx]

## Sheet: proteinGroups_AURK
Protein IDs	Majority protein IDs	Peptide counts (all)	Peptide counts (razor+unique)	Peptide counts (unique)	Fasta headers	Number of proteins	Peptides	Razor + unique peptides	Unique peptides	Sequence coverage [%]	Unique + razor sequence coverage [%]	Unique sequence coverage [%]	Mol. weight [kDa]	Sequence length	Sequence lengths	Q-value	Score	Intensity	MS/MS count	Only identified by site	Reverse	Potential contaminant	id	Peptide IDs	Peptide is razor	Mod. peptide IDs	Evidence IDs	MS/MS IDs	Best MS/MS	Oxidation (M) site IDs	Phospho (ST) site IDs	Phospho (STY) site IDs	Oxidation (M) site positions	Phospho (ST) site positions	Phospho (STY) site positions	Taxonomy IDs
RNC61524.1DNApolymerasebeta[Trypanosomacruzi]	RNC61524.1DNApolymerasebeta[Trypanosomacruzi]	79	79	79	RNC61524.1 DNA polymerase beta [Trypanosoma cruzi]	1	79	79	79	86.8	86.8	86.8	45.567	403	403	0	323.31	2122100000000	2569				31	0;1;2;6;10;11;12;16;17;22;23;43;44;45;48;49;50;51;56;57;58;59;77;78;79;80;105;106;117;119;122;123;131;132;134;135;139;140;154;161;162;163;164;165;180;181;184;185;186;191;204;205;206;210;211;215;226;230;231;232;233;267;268;273;286;287;288;291;292;293;300;303;304;305;306;316;331;332;336	True;True;True;True;True;True;True;True;True;True;True;True;True;True;True;True;True;True;True;True;True;True;True;True;True;True;True;True;True;True;True;True;True;True;True;True;True;True;True;True;True;True;True;True;True;True;True;True;True;True;True;True;True;True;True;True;True;True;True;True;True;True;True;True;True;True;True;True;True;True;True;True;True;True;True;True;True;True;True	0;1;2;6;10;11;12;13;14;15;19;20;25;26;46;47;48;49;50;51;54;55;56;57;62;63;64;65;66;67;68;86;87;88;89;114;115;126;128;131;132;133;134;143;144;145;147;148;152;153;154;155;169;176;177;178;179;180;195;196;199;200;201;202;203;204;205;213;214;227;228;229;230;236;237;238;239;240;244;255;259;260;261;262;297;298;299;300;305;318;319;320;323;324;325;326;334;337;338;339;340;341;342;343;354;371;372;373;378	0;1;2;3;4;5;6;7;8;9;10;11;12;13;14;15;16;17;18;19;20;21;22;23;24;25;26;27;28;29;30;31;32;33;34;35;36;37;38;39;40;41;42;43;44;45;46;47;48;49;50;51;52;53;54;55;56;57;58;59;60;61;62;63;64;65;66;67;68;69;70;71;72;73;74;75;76;77;78;79;80;81;82;83;84;85;86;87;88;89;90;91;92;93;94;95;96;97;98;99;100;101;102;103;104;105;106;107;108;109;110;111;112;113;114;115;116;117;118;119;120;121;122;123;124;125;126;1…	0;1;2;3;4;5;6;7;8;9;10;11;12;13;14;15;16;17;18;19;20;21;22;23;24;25;26;27;28;29;30;31;32;33;34;35;36;37;38;39;40;41;42;43;44;45;46;47;48;49;50;51;52;53;54;55;56;57;58;59;60;61;62;63;64;65;66;67;68;69;70;71;72;73;74;75;76;77;78;79;80;81;82;83;84;85;86;87;88;89;90;91;92;93;94;95;96;97;98;99;100;101;102;103;104;105;106;107;108;109;110;111;112;113;114;115;116;117;118;119;120;121;122;123;124;125;126;1…	41;93;214;281;291;297;300;318;443;454;459;493;508;524;555;607;630;686;701;720;728;729;758;774;775;776;861;896;937;1075;1091;1191;1342;1353;1367;1393;1419;1438;1469;1501;1514;1515;1521;1522;1668;1675;1689;1707;1760;1920;2024;2082;2084;2175;2195;2209;2231;2275;2293;2294;2296;2493;2509;2517;2553;2681;2683;2687;2719;2935;2949;2953;2959;2964;2974;2989;3011;3116;3140	21;22;23;24;25;26;27;28;29	3	0;1	24;80;156;236;244;246;293;364;393	366	69;275	-1

## Sheet: peptides_AURK
Sequence	N-term cleavage window	C-term cleavage window	Amino acid before	First amino acid	Second amino acid	Second last amino acid	Last amino acid	Amino acid after	A Count	R Count	N Count	D Count	C Count	Q Count	E Count	G Count	H Count	I Count	L Count	K Count	M Count	F Count	P Count	S Count	T Count	W Count	Y Count	V Count	U Count	O Count	Length	Missed cleavages	Mass	Proteins	Leading razor protein	Start position	End position	Unique (Groups)	Unique (Proteins)	Charges	PEP	Score	Intensity	Reverse	Potential contaminant	id	Protein group IDs	Mod. peptide IDs	Evidence IDs
AAAALFDR	KAIQELTQVHGFGPRAAAALFDREGIFTVE	VHGFGPRAAAALFDREGIFTVEELIEKADR	R	A	A	D	R	E	4	1	0	1	0	0	0	0	0	0	1	0	0	1	0	0	0	0	0	0	0	0	8	0	833.44	RNC61524.1DNApolymerasebeta[Trypanosomacruzi]	RNC61524.1DNApolymerasebeta[Trypanosomacruzi]	111	118	yes	yes	1;2	1.858e-25	170.06	50617000000			0	31	0	0;1;2;3;4;5;6;7;8;9;10;11;12;13;14;15;16;17;18;19;20;21;22;23;24;25;26;27;28;29;30;31;32;33;34;35;36;37;38;39;40;41;42;43;44;45;46;47;48;49;50;51;52;53
AAAALFDREGIFTVEELIEK	KAIQELTQVHGFGPRAAAALFDREGIFTVE	FDREGIFTVEELIEKADRIQLTDQQRVGVK	R	A	A	E	K	A	4	1	0	1	0	0	4	1	0	2	2	1	0	2	0	0	1	0	0	1	0	0	20	1	2221.16	RNC61524.1DNApolymerasebeta[Trypanosomacruzi]	RNC61524.1DNApolymerasebeta[Trypanosomacruzi]	111	130	yes	yes	2;3;4	5.2493e-140	300.89	23530000000			1	31	1	54;55;56;57;58;59;60;61;62;63;64;65;66;67;68;69;70;71;72;73;74;75;76;77;78;79;80;81;82;83;84;85;86;87;88;89;90;91;92;93;94;95;96;97;98;99;100;101;102;103;104;105;106;107;108;109;110;111;112;113;114;115;116;117;118
AAAALFDREGIFTVEELIEKADR	KAIQELTQVHGFGPRAAAALFDREGIFTVE	EGIFTVEELIEKADRIQLTDQQRVGVKYFH	R	A	A	D	R	I	5	2	0	2	0	0	4	1	0	2	2	1	0	2	0	0	1	0	0	1	0	0	23	2	2563.33	RNC61524.1DNApolymerasebeta[Trypanosomacruzi]	RNC61524.1DNApolymerasebeta[Trypanosomacruzi]	111	133	yes	yes	2;3;4	2.8287e-217	344.01	85252000000			2	31	2	119;120;121;122;123;124;125;126;127;128;129;130;131;132;133;134;135;136;137;138;139;140;141;142;143;144;145;146;147;148;149;150;151;152;153;154;155;156;157;158;159;160;161;162;163;164;165;166;167;168;169;170;171;172;173;174;175;176;177;178;179;180;181;182;183;184;185;186;187;188
ADRIQLTDQQR	FDREGIFTVEELIEKADRIQLTDQQRVGVK	LIEKADRIQLTDQQRVGVKYFHDINEKIPM	K	A	D	Q	R	V	1	2	0	2	0	3	0	0	0	1	1	0	0	0	0	0	1	0	0	0	0	0	11	1	1342.7	RNC61524.1DNApolymerasebeta[Trypanosomacruzi]	RNC61524.1DNApolymerasebeta[Trypanosomacruzi]	131	141	yes	yes	2;3	3.0683e-70	269.33	1267700000			6	31	6	193;194
AEEIIMTGK	DLERFPGFGSKLLKKAEEIIMTGKLEELEK	SKLLKKAEEIIMTGKLEELEKKTKPKLKAI	K	A	E	G	K	L	1	0	0	0	0	0	2	1	0	2	0	1	1	0	0	0	1	0	0	0	0	0	9	0	990.506	RNC61524.1DNApolymerasebeta[Trypanosomacruzi]	RNC61524.1DNApolymerasebeta[Trypanosomacruzi]	75	83	yes	yes	1;2	1.472e-05	140.5	3771600000			10	31	10;11	199;200;201;202;203
AEEIIMTGKLEELEK	DLERFPGFGSKLLKKAEEIIMTGKLEELEK	AEEIIMTGKLEELEKKTKPKLKAIQELTQV	K	A	E	E	K	K	1	0	0	0	0	0	5	1	0	2	2	2	1	0	0	0	1	0	0	0	0	0	15	1	1731.9	RNC61524.1DNApolymerasebeta[Trypanosomacruzi]	RNC61524.1DNApolymerasebeta[Trypanosomacruzi]	75	89	yes	yes	2;3	2.4495e-58	227.56	13028000000			11	31	12;13	204;205;206;207;208
AEEIIMTGKLEELEKK	DLERFPGFGSKLLKKAEEIIMTGKLEELEK	EEIIMTGKLEELEKKTKPKLKAIQELTQVH	K	A	E	K	K	T	1	0	0	0	0	0	5	1	0	2	2	3	1	0	0	0	1	0	0	0	0	0	16	2	1859.99	RNC61524.1DNApolymerasebeta[Trypanosomacruzi]	RNC61524.1DNApolymerasebeta[Trypanosomacruzi]	75	90	yes	yes	2;3;4	8.1658e-23	138.57	15112000000			12	31	14;15	209;210;211
AIQELTQVHGFGPR	GKLEELEKKTKPKLKAIQELTQVHGFGPRA	KAIQELTQVHGFGPRAAAALFDREGIFTVE	K	A	I	P	R	A	1	1	0	0	0	2	1	2	1	1	1	0	0	1	1	0	1	0	0	1	0	0	14	0	1551.82	RNC61524.1DNApolymerasebeta[Trypanosomacruzi]	RNC61524.1DNApolymerasebeta[Trypanosomacruzi]	97	110	yes	yes	2;3;4	5.7355e-117	292.08	95044000000			16	31	19	217;218;219;220;221;222;223;224;225;226;227;228;229;230;231;232;233;234;235;236;237;238;239;240;241;242;243;244;245;246;247;248;249;250;251;252;253;254;255;256;257;258;259;260;261;262;263;264;265;266;267;268;269;270;271;272;273;274;275;276;277;278;279;280;281;282;283;284;285;286;287;288;289;290;291;292;293;294;295;296;297;298;299;300;301;302;303;304;305;306;307;308;309;310;311;312
AIQELTQVHGFGPRAAAALFDR	GKLEELEKKTKPKLKAIQELTQVHGFGPRA	VHGFGPRAAAALFDREGIFTVEELIEKADR	K	A	I	D	R	E	5	2	0	1	0	2	1	2	1	1	2	0	0	2	1	0	1	0	0	1	0	0	22	1	2367.24	RNC61524.1DNApolymerasebeta[Trypanosomacruzi]	RNC61524.1DNApolymerasebeta[Trypanosomacruzi]	97	118	yes	yes	3;4	3.7866e-69	202.95	226600000			17	31	20	313;314;315
ALNSLKTNLDLPLR	NNALGEKYKVQSYIRALNSLKTNLDLPLRT	RALNSLKTNLDLPLRTVEDLERFPGFGSKL	R	A	L	L	R	T	1	1	2	1	0	0	0	0	0	0	5	1	0	0	1	1	1	0	0	0	0	0	14	1	1566.91	RNC61524.1DNApolymerasebeta[Trypanosomacruzi]	RNC61524.1DNApolymerasebeta[Trypanosomacruzi]	43	56	yes	yes	2;3	4.1577e-24	170.79	10807000000			22	31	25	321;322;323;324;325;326;327
ALNSLKTNLDLPLRTVEDLER	NNALGEKYKVQSYIRALNSLKTNLDLPLRT	TNLDLPLRTVEDLERFPGFGSKLLKKAEEI	R	A	L	E	R	F	1	2	2	2	0	0	2	0	0	0	6	1	0	0	1	1	2	0	0	1	0	0	21	2	2409.32	RNC61524.1DNApolymerasebeta[Trypanosomacruzi]	RNC61524.1DNApolymerasebeta[Trypanosomacruzi]	43	63	yes	yes	3	1.0392e-18	101.49	0			23	31	26	328
DVFDVLGMPFAK	KEELEVKRVHVTCEKDVFDVLGMPFAKPEN	CEKDVFDVLGMPFAKPENRDP_________	K	D	V	A	K	P	1	0	0	2	0	0	0	1	0	0	1	1	1	2	1	0	0	0	0	2	0	0	12	0	1337.67	RNC61524.1DNApolymerasebeta[Trypanosomacruzi]	RNC61524.1DNApolymerasebeta[Trypanosomacruzi]	386	397	yes	yes	2	3.8014e-09	114.5	552040000			43	31	46;47	357;358;359
DVFDVLGMPFAKPENR	KEELEVKRVHVTCEKDVFDVLGMPFAKPEN	VFDVLGMPFAKPENRDP_____________	K	D	V	N	R	D	1	1	1	2	0	0	1	1	0	0	1	1	1	2	2	0	0	0	0	2	0	0	16	1	1833.91	RNC61524.1DNApolymerasebeta[Trypanosomacruzi]	RNC61524.1DNApolymerasebeta[Trypanosomacruzi]	386	401	yes	yes	2;3;4	1.7136e-67	225.13	19929000000			44	31	48;49	360;361;362;363;364;365;366;367;368;369;370;371;372;373;374;375
DVFDVLGMPFAKPENRDP	KEELEVKRVHVTCEKDVFDVLGMPFAKPEN	DVLGMPFAKPENRDP_______________	K	D	V	D	P	-	1	1	1	3	0	0	1	1	0	0	1	1	1	2	3	0	0	0	0	2	0	0	18	2	2045.99	RNC61524.1DNApolymerasebeta[Trypanosomacruzi]	RNC61524.1DNApolymerasebeta[Trypanosomacruzi]	386	403	yes	yes	2;3;4	5.0959e-48	206.2	30559000000			45	31	50;51	376;377;378;379;380;381;382;383;384;385;386;387;388;389;390;391;392;393;394;395;396
EELEVKR	ISGHSAKMETLGLTKEELEVKRVHVTCEKD	METLGLTKEELEVKRVHVTCEKDVFDVLGM	K	E	E	K	R	V	0	1	0	0	0	0	3	0	0	0	1	1	0	0	0	0	0	0	0	1	0	0	7	1	901.487	RNC61524.1DNApolymerasebeta[Trypanosomacruzi]	RNC61524.1DNApolymerasebeta[Trypanosomacruzi]	372	378	yes	yes	1;2	3.611e-17	162.51	13653000000			48	31	54	399;400;401
EGIFTVEELIEK	VHGFGPRAAAALFDREGIFTVEELIEKADR	FDREGIFTVEELIEKADRIQLTDQQRVGVK	R	E	G	E	K	A	0	0	0	0	0	0	4	1	0	2	1	1	0	1	0	0	1	0	0	1	0	0	12	0	1405.73	RNC61524.1DNApolymerasebeta[Trypanosomacruzi]	RNC61524.1DNApolymerasebeta[Trypanosomacruzi]	119	130	yes	yes	2;3	5.8782e-24	150.15	5815900000			49	31	55	402;403;404;405;406;407;408;409;410;411;412;413;414;415;416;417;418;419;420;421;422;423;424
EGIFTVEELIEKADR	VHGFGPRAAAALFDREGIFTVEELIEKADR	EGIFTVEELIEKADRIQLTDQQRVGVKYFH	R	E	G	D	R	I	1	1	0	1	0	0	4	1	0	2	1	1	0	1	0	0	1	0	0	1	0	0	15	1	1747.9	RNC61524.1DNApolymerasebeta[Trypanosomacruzi]	RNC61524.1DNApolymerasebeta[Trypanosomacruzi]	119	133	yes	yes	2;3	5.8195e-117	289.75	76599000000			50	31	56	425;426;427;428;429;430;431;432;433;434;435;436;437;438;439;440;441;442;443;444;445;446;447;448;449;450;451;452;453;454;455;456;457;458;459;460;461;462;463;464;465;466;467;468;469;470;471;472;473;474;475;476;477
EGIFTVEELIEKADRIQLTDQQR	VHGFGPRAAAALFDREGIFTVEELIEKADR	LIEKADRIQLTDQQRVGVKYFHDINEKIPM	R	E	G	Q	R	V	1	2	0	2	0	3	4	1	0	3	2	1	0	1	0	0	2	0	0	1	0	0	23	2	2730.42	RNC61524.1DNApolymerasebeta[Trypanosomacruzi]	RNC61524.1DNApolymerasebeta[Trypanosomacruzi]	119	141	yes	yes	2;3;4	1.445e-78	208.46	1094400000			51	31	57	478;479;480;481;482
EMADLNNALGEK	RFNPDSRENIIRIFKEMADLNNALGEKYKV	IFKEMADLNNALGEKYKVQSYIRALNSLKT	K	E	M	E	K	Y	2	0	2	1	0	0	2	1	0	0	2	1	1	0	0	0	0	0	0	0	0	0	12	0	1303.61	RNC61524.1DNApolymerasebeta[Trypanosomacruzi]	RNC61524.1DNApolymerasebeta[Trypanosomacruzi]	23	34	yes	yes	1;2	1.5414e-76	264.21	45687000000			56	31	62;63	488;489;490;491;492;493;494;495;496;497;498;499;500;501;502;503;504;505
EMADLNNALGEKYK	RFNPDSRENIIRIFKEMADLNNALGEKYKV	KEMADLNNALGEKYKVQSYIRALNSLKTNL	K	E	M	Y	K	V	2	0	2	1	0	0	2	1	0	0	2	2	1	0	0	0	0	0	1	0	0	0	14	1	1594.77	RNC61524.1DNApolymerasebeta[Trypanosomacruzi]	RNC61524.1DNApolymerasebeta[Trypanosomacruzi]	23	36	yes	yes	2;3	5.1371e-37	192.3	562900000			57	31	64;65	506;507;508
EMADLNNALGEKYKVQSYIR	RFNPDSRENIIRIFKEMADLNNALGEKYKV	NNALGEKYKVQSYIRALNSLKTNLDLPLRT	K	E	M	I	R	A	2	1	2	1	0	1	2	1	0	1	2	2	1	0	0	1	0	0	2	1	0	0	20	2	2341.17	RNC61524.1DNApolymerasebeta[Trypanosomacruzi]	RNC61524.1DNApolymerasebeta[Trypanosomacruzi]	23	42	yes	yes	2;3;4	7.4569e-56	194.49	484540000			58	31	66;67	509;510;511;512;513
ENIIRIFKEMADLNNALGEK	______________________________	IFKEMADLNNALGEKYKVQSYIRALNSLKT	R	E	N	E	K	Y	2	1	3	1	0	0	3	1	0	3	2	2	1	1	0	0	0	0	0	0	0	0	20	2	2317.21	RNC61524.1DNApolymerasebeta[Trypanosomacruzi]	RNC61524.1DNApolymerasebeta[Trypanosomacruzi]	15	34	yes	yes	3	2.2033e-06	87.326	6344600			59	31	68	514
FNPDSRENIIR	______________________________	TFWRFNPDSRENIIRIFKEMADLNNALGEK	R	F	N	I	R	I	0	2	2	1	0	0	1	0	0	2	0	0	0	1	1	1	0	0	0	0	0	0	11	1	1359.69	RNC61524.1DNApolymerasebeta[Trypanosomacruzi]	RNC61524.1DNApolymerasebeta[Trypanosomacruzi]	9	19	yes	yes	1;2;3	8.3701e-13	170.47	1905900000			77	31	86	537;538;539;540;541;542
FPGFGSK	TNLDLPLRTVEDLERFPGFGSKLLKKAEEI	RTVEDLERFPGFGSKLLKKAEEIIMTGKLE	R	F	P	S	K	L	0	0	0	0	0	0	0	2	0	0	0	1	0	2	1	1	0	0	0	0	0	0	7	0	738.37	RNC61524.1DNApolymerasebeta[Trypanosomacruzi]	RNC61524.1DNApolymerasebeta[Trypanosomacruzi]	64	70	yes	yes	1;2	7.8187e-07	117.62	43795000000			78	31	87	543;544;545;546;547;548;549
FPGFGSKLLK	TNLDLPLRTVEDLERFPGFGSKLLKKAEEI	EDLERFPGFGSKLLKKAEEIIMTGKLEELE	R	F	P	L	K	K	0	0	0	0	0	0	0	2	0	0	2	2	0	2	1	1	0	0	0	0	0	0	10	1	1092.63	RNC61524.1DNApolymerasebeta[Trypanosomacruzi]	RNC61524.1DNApolymerasebeta[Trypanosomacruzi]	64	73	yes	yes	3	0.004414	74.533	500450000			79	31	88	550
FPGFGSKLLKK	TNLDLPLRTVEDLERFPGFGSKLLKKAEEI	DLERFPGFGSKLLKKAEEIIMTGKLEELEK	R	F	P	K	K	A	0	0	0	0	0	0	0	2	0	0	2	3	0	2	1	1	0	0	0	0	0	0	11	2	1220.73	RNC61524.1DNApolymerasebeta[Trypanosomacruzi]	RNC61524.1DNApolymerasebeta[Trypanosomacruzi]	64	74	yes	yes	3	0.00070582	90.913	44330000			80	31	89	551
GYLLNEYGLFK	SKNFNVIMRQAAISKGYLLNEYGLFKLGSP	AISKGYLLNEYGLFKLGSPEEVKALQERVR	K	G	Y	F	K	L	0	0	1	0	0	0	1	2	0	0	3	1	0	1	0	0	0	0	2	0	0	0	11	0	1315.68	RNC61524.1DNApolymerasebeta[Trypanosomacruzi]	RNC61524.1DNApolymerasebeta[Trypanosomacruzi]	301	311	yes	yes	2	1.1611e-38	174.41	2116300000			105	31	114	584;585;586;587;588;589;590;591;592;593;594;595;596;597;598;599;600;601;602;603;604;605;606;607;608;609;610;611;612;613;614;615;616;617;618;619;620;621;622;623;624;625;626;627;628;629;630;631;632;633;634;635;636;637;638;639
GYLLNEYGLFKLGSPEEVK	SKNFNVIMRQAAISKGYLLNEYGLFKLGSP	NEYGLFKLGSPEEVKALQERVRANKIAGTK	K	G	Y	V	K	A	0	0	1	0	0	0	3	3	0	0	4	2	0	1	1	1	0	0	2	1	0	0	19	1	2155.12	RNC61524.1DNApolymerasebeta[Trypanosomacruzi]	RNC61524.1DNApolymerasebeta[Trypanosomacruzi]	301	319	yes	yes	2;3	1.2189e-226	360.81	3652400000			106	31	115	640;641;642;643;644;645;646
HPFSGDVDAILAR	TSDYEIQVCGSYRRRHPFSGDVDAILARTL	RRHPFSGDVDAILARTLSAPPLDCPVTNTG	R	H	P	A	R	T	2	1	0	2	0	0	0	1	1	1	1	0	0	1	1	1	0	0	0	1	0	0	13	0	1396.71	RNC61524.1DNApolymerasebeta[Trypanosomacruzi]	RNC61524.1DNApolymerasebeta[Trypanosomacruzi]	190	202	yes	yes	1;2;3	6.4097e-108	291.87	87680000000			117	31	126	662;663;664;665;666;667;668;669;670;671;672;673;674;675;676;677;678;679;680;681;682;683;684;685;686;687;688;689;690;691;692;693;694;695;696;697;698;699;700;701;702;703;704;705;706;707;708;709;710;711;712;713;714;715;716;717;718;719;720;721;722;723;724;725;726;727;728;729;730;731;732;733;734;735;736;737;738;739;740;741;742;743;744;745;746;747;748;749;750;751;752;753;754;755;756;757;758;759;760;761…
IAGTKNSPTDAASDPTVEEGVDPVVSVISGHSAK	PEEVKALQERVRANKIAGTKNSPTDAASDP	GVDPVVSVISGHSAKMETLGLTKEELEVKR	K	I	A	A	K	M	4	0	1	3	0	0	2	3	1	2	0	2	0	0	3	5	3	0	0	5	0	0	34	1	3334.65	RNC61524.1DNApolymerasebeta[Trypanosomacruzi]	RNC61524.1DNApolymerasebeta[Trypanosomacruzi]	330	363	yes	yes	3;4	1.233e-106	218.4	5744500000			119	31	128	786;787;788;789;790;791;792;793;794
IFKEMADLNNALGEK	TFWRFNPDSRENIIRIFKEMADLNNALGEK	IFKEMADLNNALGEKYKVQSYIRALNSLKT	R	I	F	E	K	Y	2	0	2	1	0	0	2	1	0	1	2	2	1	1	0	0	0	0	0	0	0	0	15	1	1691.86	RNC61524.1DNApolymerasebeta[Trypanosomacruzi]	RNC61524.1DNApolymerasebeta[Trypanosomacruzi]	20	34	yes	yes	2;3	1.9584e-85	254.89	32617000000			122	31	131;132	797;798;799;800;801;802;803;804;805;806;807;808;809;810;811;812;813;814;815;816;817;818;819;820;821;822;823;824;825;826;827;828;829;830;831;832;833;834;835;836;837;838;839;840;841;842;843;844;845;846;847;848;849;850;851;852;853;854;855;856;857;858;859;860;861;862;863;864;865;866;867;868;869;870;871;872;873;874;875;876;877;878;879;880;881;882
IFKEMADLNNALGEKYK	TFWRFNPDSRENIIRIFKEMADLNNALGEK	KEMADLNNALGEKYKVQSYIRALNSLKTNL	R	I	F	Y	K	V	2	0	2	1	0	0	2	1	0	1	2	3	1	1	0	0	0	0	1	0	0	0	17	2	1983.01	RNC61524.1DNApolymerasebeta[Trypanosomacruzi]	RNC61524.1DNApolymerasebeta[Trypanosomacruzi]	20	36	yes	yes	2;3;4	4.7558e-97	270.07	646130000			123	31	133;134	883;884;885;886;887;888
IPMHESVLHENFLR	QQRVGVKYFHDINEKIPMHESVLHENFLRE	KIPMHESVLHENFLRESVQARLTSDYEIQV	K	I	P	L	R	E	0	1	1	0	0	0	2	0	2	1	2	0	1	1	1	1	0	0	0	1	0	0	14	0	1720.87	RNC61524.1DNApolymerasebeta[Trypanosomacruzi]	RNC61524.1DNApolymerasebeta[Trypanosomacruzi]	154	167	yes	yes	2;3;4	4.8555e-117	293.62	118600000000			131	31	143;144	901;902;903;904;905;906;907;908;909;910;911;912;913;914;915;916;917;918;919;920;921;922;923;924;925;926;927;928;929;930;931;932;933;934;935;936;937;938;939;940;941;942;943;944;945;946;947;948;949;950;951;952;953;954;955;956;957;958;959;960;961;962;963;964;965;966;967;968;969;970;971;972;973;974;975;976;977;978;979;980;981;982;983;984;985;986;987;988;989;990;991;992;993;994;995;996;997;998;999;100…
IPMHESVLHENFLRESVQAR	QQRVGVKYFHDINEKIPMHESVLHENFLRE	SVLHENFLRESVQARLTSDYEIQVCGSYRR	K	I	P	A	R	L	1	2	1	0	0	1	3	0	2	1	2	0	1	1	1	2	0	0	0	2	0	0	20	1	2391.21	RNC61524.1DNApolymerasebeta[Trypanosomacruzi]	RNC61524.1DNApolymerasebeta[Trypanosomacruzi]	154	173	yes	yes	3;4	6.0395e-25	140.06	117920000			132	31	145	1021;1022
IQLTDQQR	EGIFTVEELIEKADRIQLTDQQRVGVKYFH	LIEKADRIQLTDQQRVGVKYFHDINEKIPM	R	I	Q	Q	R	V	0	1	0	1	0	3	0	0	0	1	1	0	0	0	0	0	1	0	0	0	0	0	8	0	1000.53	RNC61524.1DNApolymerasebeta[Trypanosomacruzi]	RNC61524.1DNApolymerasebeta[Trypanosomacruzi]	134	141	yes	yes	2	4.1371e-29	208.54	32904000000			134	31	147	1025;1026;1027;1028;1029;1030;1031;1032;1033;1034;1035;1036;1037;1038;1039;1040;1041;1042;1043;1044;1045;1046;1047;1048;1049;1050;1051;1052;1053
IQLTDQQRVGVK	EGIFTVEELIEKADRIQLTDQQRVGVKYFH	ADRIQLTDQQRVGVKYFHDINEKIPMHESV	R	I	Q	V	K	Y	0	1	0	1	0	3	0	1	0	1	1	1	0	0	0	0	1	0	0	2	0	0	12	1	1383.78	RNC61524.1DNApolymerasebeta[Trypanosomacruzi]	RNC61524.1DNApolymerasebeta[Trypanosomacruzi]	134	145	yes	yes	2	4.2465e-62	240.1	55414000			135	31	148	1054
KAEEIIMTGK	EDLERFPGFGSKLLKKAEEIIMTGKLEELE	SKLLKKAEEIIMTGKLEELEKKTKPKLKAI	K	K	A	G	K	L	1	0	0	0	0	0	2	1	0	2	0	2	1	0	0	0	1	0	0	0	0	0	10	1	1118.6	RNC61524.1DNApolymerasebeta[Trypanosomacruzi]	RNC61524.1DNApolymerasebeta[Trypanosomacruzi]	74	83	yes	yes	1;2;3	1.1885e-64	239.54	61828000000			139	31	152;153	1059;1060;1061;1062;1063;1064;1065;1066;1067;1068;1069;1070;1071;1072;1073;1074
KAEEIIMTGKLEELEK	EDLERFPGFGSKLLKKAEEIIMTGKLEELE	AEEIIMTGKLEELEKKTKPKLKAIQELTQV	K	K	A	E	K	K	1	0	0	0	0	0	5	1	0	2	2	3	1	0	0	0	1	0	0	0	0	0	16	2	1859.99	RNC61524.1DNApolymerasebeta[Trypanosomacruzi]	RNC61524.1DNApolymerasebeta[Trypanosomacruzi]	74	89	yes	yes	2;3;4	3.3391e-266	385.92	104150000000			140	31	154;155	1075;1076;1077;1078;1079;1080;1081;1082;1083;1084;1085;1086;1087;1088;1089;1090;1091;1092;1093;1094;1095;1096;1097;1098;1099;1100
LEELEKK	SKLLKKAEEIIMTGKLEELEKKTKPKLKAI	EEIIMTGKLEELEKKTKPKLKAIQELTQVH	K	L	E	K	K	T	0	0	0	0	0	0	3	0	0	0	2	2	0	0	0	0	0	0	0	0	0	0	7	1	887.496	RNC61524.1DNApolymerasebeta[Trypanosomacruzi]	RNC61524.1DNApolymerasebeta[Trypanosomacruzi]	84	90	yes	yes	2	0.0099813	138.55	21392000000			154	31	169	1118;1119;1120
LGSPEEVK	AISKGYLLNEYGLFKLGSPEEVKALQERVR	NEYGLFKLGSPEEVKALQERVRANKIAGTK	K	L	G	V	K	A	0	0	0	0	0	0	2	1	0	0	1	1	0	0	1	1	0	0	0	1	0	0	8	0	857.449	RNC61524.1DNApolymerasebeta[Trypanosomacruzi]	RNC61524.1DNApolymerasebeta[Trypanosomacruzi]	312	319	yes	yes	1;2	4.4852e-11	127.12	40598000000			161	31	176	1129;1130;1131;1132;1133;1134;1135;1136;1137;1138;1139;1140;1141;1142;1143;1144;1145;1146;1147;1148;1149;1150;1151;1152;1153;1154;1155
LGSPEEVKALQER	AISKGYLLNEYGLFKLGSPEEVKALQERVR	FKLGSPEEVKALQERVRANKIAGTKNSPTD	K	L	G	E	R	V	1	1	0	0	0	1	3	1	0	0	2	1	0	0	1	1	0	0	0	1	0	0	13	1	1454.77	RNC61524.1DNApolymerasebeta[Trypanosomacruzi]	RNC61524.1DNApolymerasebeta[Trypanosomacruzi]	312	324	yes	yes	2	5.1834e-77	265	670580000			162	31	177	1156
LGSPEEVKALQERVR	AISKGYLLNEYGLFKLGSPEEVKALQERVR	LGSPEEVKALQERVRANKIAGTKNSPTDAA	K	L	G	V	R	A	1	2	0	0	0	1	3	1	0	0	2	1	0	0	1	1	0	0	0	2	0	0	15	2	1709.94	RNC61524.1DNApolymerasebeta[Trypanosomacruzi]	RNC61524.1DNApolymerasebeta[Trypanosomacruzi]	312	326	yes	yes	2;3;4	1.4932e-09	106.32	383110000			163	31	178	1157;1158;1159
LIEARSVPTALLTFTGSK	NGTTKHYKARRVDIRLIEARSVPTALLTFT	ARSVPTALLTFTGSKNFNVIMRQAAISKGY	R	L	I	S	K	N	2	1	0	0	0	0	1	1	0	1	3	1	0	1	1	2	3	0	0	1	0	0	18	1	1903.08	RNC61524.1DNApolymerasebeta[Trypanosomacruzi]	RNC61524.1DNApolymerasebeta[Trypanosomacruzi]	270	287	yes	yes	2;3	2.1497e-47	205.28	316870000			164	31	179	1160;1161;1162
LKAIQELTQVHGFGPR	MTGKLEELEKKTKPKLKAIQELTQVHGFGP	KAIQELTQVHGFGPRAAAALFDREGIFTVE	K	L	K	P	R	A	1	1	0	0	0	2	1	2	1	1	2	1	0	1	1	0	1	0	0	1	0	0	16	1	1792.99	RNC61524.1DNApolymerasebeta[Trypanosomacruzi]	RNC61524.1DNApolymerasebeta[Trypanosomacruzi]	95	110	yes	yes	2;3;4	2.4015e-188	336.8	11178000000			165	31	180	1163;1164;1165;1166;1167;1168
LTSDYEIQVCGSYR	SVLHENFLRESVQARLTSDYEIQVCGSYRR	RLTSDYEIQVCGSYRRRHPFSGDVDAILAR	R	L	T	Y	R	R	0	1	0	1	1	1	1	1	0	1	1	0	0	0	0	2	1	0	2	1	0	0	14	0	1689.77	RNC61524.1DNApolymerasebeta[Trypanosomacruzi]	RNC61524.1DNApolymerasebeta[Trypanosomacruzi]	174	187	yes	yes	2;3	5.2462e-145	291.66	34456000000			180	31	195	1189;1190;1191;1192;1193;1194;1195;1196;1197;1198;1199;1200;1201;1202;1203;1204;1205;1206;1207;1208;1209;1210;1211;1212;1213;1214;1215;1216;1217;1218;1219;1220;1221;1222;1223;1224;1225;1226;1227;1228;1229;1230;1231;1232;1233;1234;1235;1236;1237;1238;1239;1240;1241;1242;1243
LTSDYEIQVCGSYRR	SVLHENFLRESVQARLTSDYEIQVCGSYRR	LTSDYEIQVCGSYRRRHPFSGDVDAILART	R	L	T	R	R	R	0	2	0	1	1	1	1	1	0	1	1	0	0	0	0	2	1	0	2	1	0	0	15	1	1845.87	RNC61524.1DNApolymerasebeta[Trypanosomacruzi]	RNC61524.1DNApolymerasebeta[Trypanosomacruzi]	174	188	yes	yes	2;3	5.0681e-77	237.53	2944200000			181	31	196	1244;1245;1246;1247;1248;1249;1250;1251
METLGLTK	GVDPVVSVISGHSAKMETLGLTKEELEVKR	ISGHSAKMETLGLTKEELEVKRVHVTCEKD	K	M	E	T	K	E	0	0	0	0	0	0	1	1	0	0	2	1	1	0	0	0	2	0	0	0	0	0	8	0	891.474	RNC61524.1DNApolymerasebeta[Trypanosomacruzi]	RNC61524.1DNApolymerasebeta[Trypanosomacruzi]	364	371	yes	yes	1;2	2.572e-05	141.39	11706000000			184	31	199;200	1255;1256;1257;1258;1259;1260;1261;1262
METLGLTKEELEVK	GVDPVVSVISGHSAKMETLGLTKEELEVKR	KMETLGLTKEELEVKRVHVTCEKDVFDVLG	K	M	E	V	K	R	0	0	0	0	0	0	4	1	0	0	3	2	1	0	0	0	2	0	0	1	0	0	14	1	1618.85	RNC61524.1DNApolymerasebeta[Trypanosomacruzi]	RNC61524.1DNApolymerasebeta[Trypanosomacruzi]	364	377	yes	yes	2;3;4	2.7059e-100	279.86	105340000000			185	31	201;202	1263;1264;1265;1266;1267;1268;1269;1270;1271;1272;1273;1274;1275;1276;1277;1278;1279;1280;1281;1282;1283;1284;1285;1286;1287;1288;1289;1290;1291;1292;1293;1294
METLGLTKEELEVKR	GVDPVVSVISGHSAKMETLGLTKEELEVKR	METLGLTKEELEVKRVHVTCEKDVFDVLGM	K	M	E	K	R	V	0	1	0	0	0	0	4	1	0	0	3	2	1	0	0	0	2	0	0	1	0	0	15	2	1774.95	RNC61524.1DNApolymerasebeta[Trypanosomacruzi]	RNC61524.1DNApolymerasebeta[Trypanosomacruzi]	364	378	yes	yes	2;3;4	1.8062e-200	356.68	91667000000			186	31	203;204;205	1295;1296;1297;1298;1299;1300;1301;1302;1303;1304;1305;1306;1307;1308;1309;1310;1311;1312;1313;1314;1315;1316;1317;1318;1319;1320;1321;1322;1323
NFNVIMR	ARSVPTALLTFTGSKNFNVIMRQAAISKGY	LLTFTGSKNFNVIMRQAAISKGYLLNEYGL	K	N	F	M	R	Q	0	1	2	0	0	0	0	0	0	1	0	0	1	1	0	0	0	0	0	1	0	0	7	0	892.459	RNC61524.1DNApolymerasebeta[Trypanosomacruzi]	RNC61524.1DNApolymerasebeta[Trypanosomacruzi]	288	294	yes	yes	1;2	2.5508e-17	185.88	92125000000			191	31	213;214	1334;1335;1336;1337;1338;1339;1340;1341;1342;1343;1344;1345;1346;1347;1348;1349;1350;1351;1352;1353;1354;1355;1356;1357;1358;1359;1360;1361;1362;1363;1364;1365;1366;1367;1368;1369;1370;1371;1372;1373;1374;1375;1376;1377;1378;1379;1380;1381;1382;1383;1384;1385;1386;1387;1388;1389;1390;1391;1392;1393;1394;1395;1396;1397;1398;1399;1400;1401;1402;1403;1404;1405;1406;1407;1408;1409;1410;1411;1412;1413…
NSPTDAASDPTVEEGVDPVVSVISGHSAK	ALQERVRANKIAGTKNSPTDAASDPTVEEG	GVDPVVSVISGHSAKMETLGLTKEELEVKR	K	N	S	A	K	M	3	0	1	3	0	0	2	2	1	1	0	1	0	0	3	5	2	0	0	5	0	0	29	0	2864.37	RNC61524.1DNApolymerasebeta[Trypanosomacruzi]	RNC61524.1DNApolymerasebeta[Trypanosomacruzi]	335	363	yes	yes	2;3;4	1.4734e-234	340.59	60208000000			204	31	227	1485;1486;1487;1488;1489;1490;1491;1492;1493;1494;1495;1496;1497;1498;1499;1500;1501;1502;1503;1504;1505;1506;1507;1508;1509;1510;1511;1512;1513;1514;1515;1516;1517;1518;1519;1520;1521;1522;1523;1524;1525;1526;1527;1528;1529;1530;1531;1532;1533;1534;1535;1536;1537;1538;1539;1540;1541;1542;1543;1544
NSPTDAASDPTVEEGVDPVVSVISGHSAKMETLGLTK	ALQERVRANKIAGTKNSPTDAASDPTVEEG	ISGHSAKMETLGLTKEELEVKRVHVTCEKD	K	N	S	T	K	E	3	0	1	3	0	0	3	3	1	1	2	2	1	0	3	5	4	0	0	5	0	0	37	1	3737.83	RNC61524.1DNApolymerasebeta[Trypanosomacruzi]	RNC61524.1DNApolymerasebeta[Trypanosomacruzi]	335	371	yes	yes	3;4	8.5446e-100	197.58	430610000			205	31	228;229	1545;1546;1547
NSPTDAASDPTVEEGVDPVVSVISGHSAKMETLGLTKEELEVK	ALQERVRANKIAGTKNSPTDAASDPTVEEG	KMETLGLTKEELEVKRVHVTCEKDVFDVLG	K	N	S	V	K	R	3	0	1	3	0	0	6	3	1	1	3	3	1	0	3	5	4	0	0	6	0	0	43	2	4465.21	RNC61524.1DNApolymerasebeta[Trypanosomacruzi]	RNC61524.1DNApolymerasebeta[Trypanosomacruzi]	335	377	yes	yes	4;5	7.5572e-54	131.11	479110000			206	31	230	1548;1549
NYLEATMAQGPLK	NTGVLGTLVDYLQERNYLEATMAQGPLKYM	ERNYLEATMAQGPLKYMGMGRLPPRTTNGT	R	N	Y	L	K	Y	2	0	1	0	0	1	1	1	0	0	2	1	1	0	1	0	1	0	1	0	0	0	13	0	1434.72	RNC61524.1DNApolymerasebeta[Trypanosomacruzi]	RNC61524.1DNApolymerasebeta[Trypanosomacruzi]	230	242	yes	yes	1;2;3	3.6745e-45	188.04	112350000000			210	31	236;237	1563;1564;1565;1566;1567;1568;1569;1570;1571;1572;1573;1574;1575;1576;1577;1578;1579;1580;1581;1582;1583;1584;1585;1586;1587;1588;1589;1590;1591;1592;1593;1594;1595;1596;1597;1598;1599;1600;1601;1602;1603;1604;1605;1606;1607;1608;1609;1610;1611;1612;1613;1614;1615;1616;1617;1618;1619;1620;1621;1622;1623;1624
NYLEATMAQGPLKYMGMGR	NTGVLGTLVDYLQERNYLEATMAQGPLKYM	ATMAQGPLKYMGMGRLPPRTTNGTTKHYKA	R	N	Y	G	R	L	2	1	1	0	0	1	1	3	0	0	2	1	3	0	1	0	1	0	2	0	0	0	19	1	2130.01	RNC61524.1DNApolymerasebeta[Trypanosomacruzi]	RNC61524.1DNApolymerasebeta[Trypanosomacruzi]	230	248	yes	yes	2;3	4.999e-24	133.88	440180000			211	31	238;239;240	1625;1626;1627;1628;1629
QAAISKGYLLNEYGLFK	LLTFTGSKNFNVIMRQAAISKGYLLNEYGL	AISKGYLLNEYGLFKLGSPEEVKALQERVR	R	Q	A	F	K	L	2	0	1	0	0	1	1	2	0	1	3	2	0	1	0	1	0	0	2	0	0	0	17	1	1914.03	RNC61524.1DNApolymerasebeta[Trypanosomacruzi]	RNC61524.1DNApolymerasebeta[Trypanosomacruzi]	295	311	yes	yes	2;3	0	442.59	2442400000			215	31	244	1636;1637
RHPFSGDVDAILAR	LTSDYEIQVCGSYRRRHPFSGDVDAILART	RRHPFSGDVDAILARTLSAPPLDCPVTNTG	R	R	H	A	R	T	2	2	0	2	0	0	0	1	1	1	1	0	0	1	1	1	0	0	0	1	0	0	14	1	1552.81	RNC61524.1DNApolymerasebeta[Trypanosomacruzi]	RNC61524.1DNApolymerasebeta[Trypanosomacruzi]	189	202	yes	yes	1;2;3;4	6.6431e-57	226.53	86407000000			226	31	255	1653;1654;1655;1656;1657;1658;1659;1660;1661;1662;1663;1664;1665;1666;1667;1668;1669;1670;1671;1672;1673;1674;1675;1676;1677;1678;1679;1680;1681;1682
RRHPFSGDVDAILAR	RLTSDYEIQVCGSYRRRHPFSGDVDAILAR	RRHPFSGDVDAILARTLSAPPLDCPVTNTG	R	R	R	A	R	T	2	3	0	2	0	0	0	1	1	1	1	0	0	1	1	1	0	0	0	1	0	0	15	2	1708.91	RNC61524.1DNApolymerasebeta[Trypanosomacruzi]	RNC61524.1DNApolymerasebeta[Trypanosomacruzi]	188	202	yes	yes	2;3;4	7.3069e-135	309.35	31321000000			230	31	259	1688;1689;1690;1691;1692;1693;1694;1695;1696;1697;1698;1699;1700;1701;1702;1703;1704;1705
RTFWRFNPDSR	______________________________	______________________________	R	R	T	S	R	E	0	3	1	1	0	0	0	0	0	0	0	0	0	2	1	1	1	1	0	0	0	0	11	2	1480.73	RNC61524.1DNApolymerasebeta[Trypanosomacruzi]	RNC61524.1DNApolymerasebeta[Trypanosomacruzi]	4	14	yes	yes	3	8.8886e-05	105.65	19751000			231	31	260	1706
RVDIRLIEAR	PPRTTNGTTKHYKARRVDIRLIEARSVPTA	HYKARRVDIRLIEARSVPTALLTFTGSKNF	R	R	V	A	R	S	1	3	0	1	0	0	1	0	0	2	1	0	0	0	0	0	0	0	0	1	0	0	10	2	1239.74	RNC61524.1DNApolymerasebeta[Trypanosomacruzi]	RNC61524.1DNApolymerasebeta[Trypanosomacruzi]	265	274	yes	yes	3	1.7624e-05	110.93	26276000			232	31	261	1707
RVHVTCEKDVFDVLGMPFAK	KMETLGLTKEELEVKRVHVTCEKDVFDVLG	CEKDVFDVLGMPFAKPENRDP_________	K	R	V	A	K	P	1	1	0	2	1	0	1	1	1	0	1	2	1	2	1	0	1	0	0	4	0	0	20	2	2347.18	RNC61524.1DNApolymerasebeta[Trypanosomacruzi]	RNC61524.1DNApolymerasebeta[Trypanosomacruzi]	378	397	yes	yes	3;4;5	3.3762e-25	141.31	313120000			233	31	262	1708;1709;1710
SVPTALLTFTGSK	HYKARRVDIRLIEARSVPTALLTFTGSKNF	ARSVPTALLTFTGSKNFNVIMRQAAISKGY	R	S	V	S	K	N	1	0	0	0	0	0	0	1	0	0	2	1	0	1	1	2	3	0	0	1	0	0	13	0	1320.73	RNC61524.1DNApolymerasebeta[Trypanosomacruzi]	RNC61524.1DNApolymerasebeta[Trypanosomacruzi]	275	287	yes	yes	2;3	1.9484e-33	155.11	23820000000			267	31	297;298	1761;1762;1763;1764;1765;1766;1767;1768;1769;1770;1771;1772;1773;1774;1775;1776;1777;1778;1779;1780;1781;1782;1783;1784;1785;1786;1787;1788;1789;1790;1791;1792;1793;1794;1795;1796;1797;1798;1799;1800;1801;1802;1803;1804;1805;1806;1807;1808;1809;1810;1811;1812;1813;1814;1815;1816;1817;1818;1819;1820;1821;1822
SVPTALLTFTGSKNFNVIMR	HYKARRVDIRLIEARSVPTALLTFTGSKNF	LLTFTGSKNFNVIMRQAAISKGYLLNEYGL	R	S	V	M	R	Q	1	1	2	0	0	0	0	1	0	1	2	1	1	2	1	2	3	0	0	2	0	0	20	1	2195.18	RNC61524.1DNApolymerasebeta[Trypanosomacruzi]	RNC61524.1DNApolymerasebeta[Trypanosomacruzi]	275	294	yes	yes	2;3	4.8298e-34	153.21	2690800000			268	31	299;300	1823;1824;1825;1826;1827;1828;1829;1830;1831;1832
TFWRFNPDSR	______________________________	______________________________	R	T	F	S	R	E	0	2	1	1	0	0	0	0	0	0	0	0	0	2	1	1	1	1	0	0	0	0	10	1	1324.63	RNC61524.1DNApolymerasebeta[Trypanosomacruzi]	RNC61524.1DNApolymerasebeta[Trypanosomacruzi]	5	14	yes	yes	3	0.013839	52.693	14440000			273	31	305	1837
TNLDLPLR	KYKVQSYIRALNSLKTNLDLPLRTVEDLER	RALNSLKTNLDLPLRTVEDLERFPGFGSKL	K	T	N	L	R	T	0	1	1	1	0	0	0	0	0	0	3	0	0	0	1	0	1	0	0	0	0	0	8	0	940.534	RNC61524.1DNApolymerasebeta[Trypanosomacruzi]	RNC61524.1DNApolymerasebeta[Trypanosomacruzi]	49	56	yes	yes	1;2	3.1465e-29	211.87	95092000000			286	31	318	1862;1863;1864;1865;1866;1867;1868;1869;1870;1871;1872;1873;1874;1875;1876;1877;1878;1879;1880;1881;1882;1883;1884;1885;1886;1887;1888;1889;1890;1891;1892;1893;1894;1895;1896;1897;1898;1899
TNLDLPLRTVEDLER	KYKVQSYIRALNSLKTNLDLPLRTVEDLER	TNLDLPLRTVEDLERFPGFGSKLLKKAEEI	K	T	N	E	R	F	0	2	1	2	0	0	2	0	0	0	4	0	0	0	1	0	2	0	0	1	0	0	15	1	1782.95	RNC61524.1DNApolymerasebeta[Trypanosomacruzi]	RNC61524.1DNApolymerasebeta[Trypanosomacruzi]	49	63	yes	yes	2;3	5.1897e-10	108.5	390710000			287	31	319	1900;1901
TNLDLPLRTVEDLERFPGFGSK	KYKVQSYIRALNSLKTNLDLPLRTVEDLER	RTVEDLERFPGFGSKLLKKAEEIIMTGKLE	K	T	N	S	K	L	0	2	1	2	0	0	2	2	0	0	4	1	0	2	2	1	2	0	0	1	0	0	22	2	2503.31	RNC61524.1DNApolymerasebeta[Trypanosomacruzi]	RNC61524.1DNApolymerasebeta[Trypanosomacruzi]	49	70	yes	yes	3;4	4.9173e-07	72.564	100740000			288	31	320	1902;1903;1904
TVEDLER	RALNSLKTNLDLPLRTVEDLERFPGFGSKL	TNLDLPLRTVEDLERFPGFGSKLLKKAEEI	R	T	V	E	R	F	0	1	0	1	0	0	2	0	0	0	1	0	0	0	0	0	1	0	0	1	0	0	7	0	860.424	RNC61524.1DNApolymerasebeta[Trypanosomacruzi]	RNC61524.1DNApolymerasebeta[Trypanosomacruzi]	57	63	yes	yes	2	0.00020142	130.05	24648000000			291	31	323	1907;1908;1909;1910;1911;1912;1913
TVEDLERFPGFGSK	RALNSLKTNLDLPLRTVEDLERFPGFGSKL	RTVEDLERFPGFGSKLLKKAEEIIMTGKLE	R	T	V	S	K	L	0	1	0	1	0	0	2	2	0	0	1	1	0	2	1	1	1	0	0	1	0	0	14	1	1580.78	RNC61524.1DNApolymerasebeta[Trypanosomacruzi]	RNC61524.1DNApolymerasebeta[Trypanosomacruzi]	57	70	yes	yes	2;3;4	2.8916e-155	329.49	92117000000			292	31	324;325	1914;1915;1916;1917;1918;1919;1920;1921;1922;1923;1924;1925;1926;1927;1928;1929;1930;1931;1932;1933;1934;1935;1936;1937;1938;1939;1940;1941;1942;1943;1944;1945;1946;1947;1948;1949;1950;1951;1952;1953;1954;1955;1956;1957;1958;1959;1960;1961;1962;1963;1964;1965;1966;1967;1968;1969;1970;1971;1972;1973;1974;1975;1976;1977;1978;1979;1980;1981;1982;1983;1984;1985;1986;1987;1988;1989;1990;1991;1992;1993…
TVEDLERFPGFGSKLLK	RALNSLKTNLDLPLRTVEDLERFPGFGSKL	EDLERFPGFGSKLLKKAEEIIMTGKLEELE	R	T	V	L	K	K	0	1	0	1	0	0	2	2	0	0	3	2	0	2	1	1	1	0	0	1	0	0	17	2	1935.05	RNC61524.1DNApolymerasebeta[Trypanosomacruzi]	RNC61524.1DNApolymerasebeta[Trypanosomacruzi]	57	73	yes	yes	2;3;4	5.2267e-46	205.3	2656500000			293	31	326	2024;2025;2026
VDIRLIEAR	PRTTNGTTKHYKARRVDIRLIEARSVPTAL	HYKARRVDIRLIEARSVPTALLTFTGSKNF	R	V	D	A	R	S	1	2	0	1	0	0	1	0	0	2	1	0	0	0	0	0	0	0	0	1	0	0	9	1	1083.64	RNC61524.1DNApolymerasebeta[Trypanosomacruzi]	RNC61524.1DNApolymerasebeta[Trypanosomacruzi]	266	274	yes	yes	3	0.0041006	79.148	8642400			300	31	334	2039
VGVKYFHDINEK	LIEKADRIQLTDQQRVGVKYFHDINEKIPM	QQRVGVKYFHDINEKIPMHESVLHENFLRE	R	V	G	E	K	I	0	0	1	1	0	0	1	1	1	1	0	2	0	1	0	0	0	0	1	2	0	0	12	1	1447.75	RNC61524.1DNApolymerasebeta[Trypanosomacruzi]	RNC61524.1DNApolymerasebeta[Trypanosomacruzi]	142	153	yes	yes	2;4	1.7795e-90	270.61	693410000			303	31	337	2043;2044
VGVKYFHDINEKIPMHESVLHENFLR	LIEKADRIQLTDQQRVGVKYFHDINEKIPM	KIPMHESVLHENFLRESVQARLTSDYEIQV	R	V	G	L	R	E	0	1	2	1	0	0	3	1	3	2	2	2	1	2	1	1	0	0	1	3	0	0	26	2	3150.61	RNC61524.1DNApolymerasebeta[Trypanosomacruzi]	RNC61524.1DNApolymerasebeta[Trypanosomacruzi]	142	167	yes	yes	4;5;6	3.0892e-68	180.85	188960000			304	31	338;339	2045;2046;2047;2048
VHVTCEKDVFDVLGMPFAK	METLGLTKEELEVKRVHVTCEKDVFDVLGM	CEKDVFDVLGMPFAKPENRDP_________	R	V	H	A	K	P	1	0	0	2	1	0	1	1	1	0	1	2	1	2	1	0	1	0	0	4	0	0	19	1	2191.08	RNC61524.1DNApolymerasebeta[Trypanosomacruzi]	RNC61524.1DNApolymerasebeta[Trypanosomacruzi]	379	397	yes	yes	2;3;4	2.8796e-78	230.16	1294500000			305	31	340;341	2049;2050;2051;2052;2053;2054
VHVTCEKDVFDVLGMPFAKPENR	METLGLTKEELEVKRVHVTCEKDVFDVLGM	VFDVLGMPFAKPENRDP_____________	R	V	H	N	R	D	1	1	1	2	1	0	2	1	1	0	1	2	1	2	2	0	1	0	0	4	0	0	23	2	2687.32	RNC61524.1DNApolymerasebeta[Trypanosomacruzi]	RNC61524.1DNApolymerasebeta[Trypanosomacruzi]	379	401	yes	yes	2;3;4;5;6	1.1529e-193	330.75	16461000000			306	31	342;343	2055;2056;2057;2058;2059;2060;2061;2062;2063;2064
VQSYIRALNSLK	KEMADLNNALGEKYKVQSYIRALNSLKTNL	KYKVQSYIRALNSLKTNLDLPLRTVEDLER	K	V	Q	L	K	T	1	1	1	0	0	1	0	0	0	1	2	1	0	0	0	2	0	0	1	1	0	0	12	1	1390.79	RNC61524.1DNApolymerasebeta[Trypanosomacruzi]	RNC61524.1DNApolymerasebeta[Trypanosomacruzi]	37	48	yes	yes	2	6.5163e-39	218.62	37482000			316	31	354	2077
YFHDINEK	ADRIQLTDQQRVGVKYFHDINEKIPMHESV	QQRVGVKYFHDINEKIPMHESVLHENFLRE	K	Y	F	E	K	I	0	0	1	1	0	0	1	0	1	1	0	1	0	1	0	0	0	0	1	0	0	0	8	0	1064.49	RNC61524.1DNApolymerasebeta[Trypanosomacruzi]	RNC61524.1DNApolymerasebeta[Trypanosomacruzi]	146	153	yes	yes	2;3	2.1132e-16	190.52	31698000000			331	31	371	2096;2097;2098;2099;2100;2101;2102;2103;2104;2105;2106;2107;2108;2109;2110;2111;2112;2113;2114;2115;2116;2117;2118;2119;2120;2121;2122;2123;2124;2125;2126;2127;2128;2129;2130;2131;2132;2133;2134;2135;2136;2137;2138;2139;2140
YFHDINEKIPMHESVLHENFLR	ADRIQLTDQQRVGVKYFHDINEKIPMHESV	KIPMHESVLHENFLRESVQARLTSDYEIQV	K	Y	F	L	R	E	0	1	2	1	0	0	3	0	3	2	2	1	1	2	1	1	0	0	1	1	0	0	22	1	2767.35	RNC61524.1DNApolymerasebeta[Trypanosomacruzi]	RNC61524.1DNApolymerasebeta[Trypanosomacruzi]	146	167	yes	yes	2;3;4;5;6	3.7782e-120	267.77	100630000000			332	31	372;373	2141;2142;2143;2144;2145;2146;2147;2148;2149;2150;2151;2152;2153;2154;2155;2156;2157;2158;2159;2160;2161;2162;2163;2164;2165;2166;2167;2168;2169;2170;2171;2172;2173;2174;2175;2176;2177;2178;2179;2180;2181;2182;2183;2184;2185;2186;2187;2188
YKVQSYIR	IFKEMADLNNALGEKYKVQSYIRALNSLKT	NNALGEKYKVQSYIRALNSLKTNLDLPLRT	K	Y	K	I	R	A	0	1	0	0	0	1	0	0	0	1	0	1	0	0	0	1	0	0	2	1	0	0	8	1	1055.58	RNC61524.1DNApolymerasebeta[Trypanosomacruzi]	RNC61524.1DNApolymerasebeta[Trypanosomacruzi]	35	42	yes	yes	1;2;3	3.2294e-50	238.7	32387000000			336	31	378	2195;2196;2197;2198;2199;2200;2201;2202;2203;2204;2205
[truncated: 7 more columns]

## Sheet: Phospho (STY)Sites_AURK
Proteins	Positions within proteins	Leading proteins	Protein	Fasta headers	Localization prob	Score diff	PEP	Score	Delta score	Score for localization	Diagnostic peak	Number of Phospho (STY)	Amino acid	Sequence window	Modification window	Peptide window coverage	Phospho (STY) Probabilities	Phospho (STY) Score diffs	Position in peptide	Charge	Mass error [ppm]	Intensity	Intensity___1	Intensity___2	Intensity___3	Ratio mod/base	Reverse	Potential contaminant	id	Protein group IDs	Positions	Position	Peptide IDs	Mod. peptide IDs	Evidence IDs	MS/MS IDs	Best localization evidence ID	Best localization MS/MS ID	Best localization raw file	Best localization scan number	Best score evidence ID	Best score MS/MS ID	Best score raw file	Best score scan number	Best PEP evidence ID	Best PEP MS/MS ID	Best PEP raw file	Best PEP scan number
RNC61524.1DNApolymerasebeta[Trypanosomacruzi]	275	RNC61524.1DNApolymerasebeta[Trypanosomacruzi]	RNC61524.1DNApolymerasebeta[Trypanosomacruzi]	RNC61524.1 DNA polymerase beta [Trypanosoma cruzi]	0.999344	31.8279	4.6615e-12	133.15	130.15	133.15		1	S	HYKARRVDIRLIEARSVPTALLTFTGSKNFN	X;X;X;X;X;X;X;X;X;X;X;X;X;X;X;Phospho (STY);X;X;X;X;X;X;X;X;X;X;X;X;X;X;X	XXXXXXXXXXXXXXXPPPPPPPPPPPPPXXX	S(0.999)VPT(0.001)ALLTFTGSK	S(32)VPT(-32)ALLT(-94)FT(-110)GS(-100)K	1	2	0.59727	51586000	51586000	0	0	0.0021704			0	31	275	275	267	298	1822	2501	1822	2501	ABQ_20230609_AURK	42289	1822	2501	ABQ_20230609_AURK	42289	1822	2501	ABQ_20230609_AURK	42289
RNC61524.1DNApolymerasebeta[Trypanosomacruzi]	69	RNC61524.1DNApolymerasebeta[Trypanosomacruzi]	RNC61524.1DNApolymerasebeta[Trypanosomacruzi]	RNC61524.1 DNA polymerase beta [Trypanosoma cruzi]	1	211.855	7.17999e-72	251.02	251.02	251.02		1	S	PLRTVEDLERFPGFGSKLLKKAEEIIMTGKL	X;X;X;X;X;X;X;X;X;X;X;X;X;X;X;Phospho (STY);X;X;X;X;X;X;X;X;X;X;Oxidation (M);X;X;X;X	XXXPPPPPPPPPPPPPPXXXXXXXXXXXXXX	TVEDLERFPGFGS(1)K	T(-210)VEDLERFPGFGS(210)K	13	2	0.26166	43434000	43434000	0	0	0.00047173			1	31	69	69	292	325	2023	2930	2023	2930	ABQ_20230609_AURK	30181	2023	2930	ABQ_20230609_AURK	30181	2023	2930	ABQ_20230609_AURK	30181
RNC61524.1DNApolymerasebeta[Trypanosomacruzi]	366	RNC61524.1DNApolymerasebeta[Trypanosomacruzi]	RNC61524.1DNApolymerasebeta[Trypanosomacruzi]	RNC61524.1 DNA polymerase beta [Trypanosoma cruzi]	0.673461	3.14377	0.000300007	70.529	65.45	70.529		1	T	DPVVSVISGHSAKMETLGLTKEELEVKRVHV	X;X;X;X;X;X;X;X;X;X;X;X;X;Oxidation (M);X;Phospho (ST);X;X;X;X;X;X;X;X;X;X;X;X;X;X;X	XXXXXXXXXXXXXPPPPPPPPPPPPPPPXXX	MET(0.673)LGLT(0.327)KEELEVKR	MET(3.1)LGLT(-3.1)KEELEVKR	3	2	-4.2791	8561300	8561300	0	0	9.3404e-05			3	31	366	366	186	205	1323	1771	1323	1771	ABQ_20230609_AURK	22382	1323	1771	ABQ_20230609_AURK	22382	1323	1771	ABQ_20230609_AURK	22382

## Sheet: proteinGroups_CK1
Protein IDs	Majority protein IDs	Peptide counts (all)	Peptide counts (razor+unique)	Peptide counts (unique)	Fasta headers	Number of proteins	Peptides	Razor + unique peptides	Unique peptides	Sequence coverage [%]	Unique + razor sequence coverage [%]	Unique sequence coverage [%]	Mol. weight [kDa]	Sequence length	Sequence lengths	Q-value	Score	Intensity	MS/MS count	Only identified by site	Reverse	Potential contaminant	id	Peptide IDs	Peptide is razor	Mod. peptide IDs	Evidence IDs	MS/MS IDs	Best MS/MS	Oxidation (M) site IDs	Phospho (ST) site IDs	Phospho (STY) site IDs	Oxidation (M) site positions	Phospho (ST) site positions	Phospho (STY) site positions	Taxonomy IDs
RNC61524.1DNApolymerasebeta[Trypanosomacruzi]	RNC61524.1DNApolymerasebeta[Trypanosomacruzi]	85	85	85	RNC61524.1 DNA polymerase beta [Trypanosoma cruzi]	1	85	85	85	88.6	88.6	88.6	45.567	403	403	0	323.31	2516500000000	3009				37	0;1;2;6;10;11;12;18;19;20;25;45;46;47;51;52;53;54;60;61;62;63;78;79;80;81;109;110;111;120;122;125;126;134;135;136;137;141;142;157;162;163;164;165;166;171;183;184;189;190;191;197;214;215;216;220;221;225;226;241;244;245;246;247;283;284;285;292;305;306;307;313;314;315;320;323;324;325;326;338;350;351;355;356;359	True;True;True;True;True;True;True;True;True;True;True;True;True;True;True;True;True;True;True;True;True;True;True;True;True;True;True;True;True;True;True;True;True;True;True;True;True;True;True;True;True;True;True;True;True;True;True;True;True;True;True;True;True;True;True;True;True;True;True;True;True;True;True;True;True;True;True;True;True;True;True;True;True;True;True;True;True;True;True;True…	0;1;2;7;11;12;13;14;15;16;22;23;24;29;30;50;51;52;53;54;55;59;60;61;62;68;69;70;71;72;73;74;90;91;92;93;94;123;124;125;126;135;137;138;141;142;143;144;153;154;155;156;157;161;162;163;164;179;184;185;186;187;188;193;205;206;207;208;213;214;215;216;217;218;227;228;246;247;248;249;250;251;257;258;259;260;261;262;266;267;282;283;286;287;288;289;325;326;327;328;329;336;349;350;351;357;358;359;360;361;…	0;1;2;3;4;5;6;7;8;9;10;11;12;13;14;15;16;17;18;19;20;21;22;23;24;25;26;27;28;29;30;31;32;33;34;35;36;37;38;39;40;41;42;43;44;45;46;47;48;49;50;51;52;53;54;55;56;57;58;59;60;61;62;63;64;65;66;67;68;69;70;71;72;73;74;75;76;77;78;79;80;81;82;83;84;85;86;87;88;89;90;91;92;93;94;95;96;97;98;99;100;101;102;103;104;105;106;107;108;109;110;111;112;113;114;115;116;117;118;119;120;121;122;123;124;125;126;1…	0;1;2;3;4;5;6;7;8;9;10;11;12;13;14;15;16;17;18;19;20;21;22;23;24;25;26;27;28;29;30;31;32;33;34;35;36;37;38;39;40;41;42;43;44;45;46;47;48;49;50;51;52;53;54;55;56;57;58;59;60;61;62;63;64;65;66;67;68;69;70;71;72;73;74;75;76;77;78;79;80;81;82;83;84;85;86;87;88;89;90;91;92;93;94;95;96;97;98;99;100;101;102;103;104;105;106;107;108;109;110;111;112;113;114;115;116;117;118;119;120;121;122;123;124;125;126;1…	39;75;187;281;297;317;320;354;493;494;504;539;556;572;604;663;687;748;763;794;797;801;834;840;852;853;959;973;976;1009;1172;1184;1313;1479;1504;1517;1585;1605;1634;1672;1700;1710;1712;1718;1725;1749;1881;1890;1915;1942;2022;2233;2308;2366;2369;2505;2527;2539;2540;2573;2622;2648;2649;2651;2845;2866;2878;2888;3041;3052;3057;3076;3122;3328;3343;3350;3356;3365;3382;3398;3414;3565;3606;3623;3627	26;27;28;29;30;31;32;33;34	4;5;6;11;12	1;2;3;4;8;9;10;11	24;80;156;236;244;246;293;364;393	13;185;193;345;382	46;49;69;275;278;307;336;338	-1

## Sheet: peptides_CK1
Sequence	N-term cleavage window	C-term cleavage window	Amino acid before	First amino acid	Second amino acid	Second last amino acid	Last amino acid	Amino acid after	A Count	R Count	N Count	D Count	C Count	Q Count	E Count	G Count	H Count	I Count	L Count	K Count	M Count	F Count	P Count	S Count	T Count	W Count	Y Count	V Count	U Count	O Count	Length	Missed cleavages	Mass	Proteins	Leading razor protein	Start position	End position	Unique (Groups)	Unique (Proteins)	Charges	PEP	Score	Intensity	Reverse	Potential contaminant	id	Protein group IDs	Mod. peptide IDs	Evidence IDs
AAAALFDR	KAIQELTQVHGFGPRAAAALFDREGIFTVE	VHGFGPRAAAALFDREGIFTVEELIEKADR	R	A	A	D	R	E	4	1	0	1	0	0	0	0	0	0	1	0	0	1	0	0	0	0	0	0	0	0	8	0	833.44	RNC61524.1DNApolymerasebeta[Trypanosomacruzi]	RNC61524.1DNApolymerasebeta[Trypanosomacruzi]	111	118	yes	yes	1;2	6.5191e-38	186.43	50438000000			0	37	0	0;1;2;3;4;5;6;7;8;9;10;11;12;13;14;15;16;17;18;19;20;21;22;23;24;25;26;27;28;29;30;31;32;33;34;35;36;37;38;39;40;41;42
AAAALFDREGIFTVEELIEK	KAIQELTQVHGFGPRAAAALFDREGIFTVE	FDREGIFTVEELIEKADRIQLTDQQRVGVK	R	A	A	E	K	A	4	1	0	1	0	0	4	1	0	2	2	1	0	2	0	0	1	0	0	1	0	0	20	1	2221.16	RNC61524.1DNApolymerasebeta[Trypanosomacruzi]	RNC61524.1DNApolymerasebeta[Trypanosomacruzi]	111	130	yes	yes	2;3;4	3.2423e-194	317.1	117180000000			1	37	1	43;44;45;46;47;48;49;50;51;52;53;54;55;56;57;58;59;60;61;62;63;64;65;66;67;68;69;70;71;72;73;74;75;76;77;78;79;80;81;82;83;84;85;86;87;88;89;90;91;92;93;94;95;96;97;98;99;100;101
AAAALFDREGIFTVEELIEKADR	KAIQELTQVHGFGPRAAAALFDREGIFTVE	EGIFTVEELIEKADRIQLTDQQRVGVKYFH	R	A	A	D	R	I	5	2	0	2	0	0	4	1	0	2	2	1	0	2	0	0	1	0	0	1	0	0	23	2	2563.33	RNC61524.1DNApolymerasebeta[Trypanosomacruzi]	RNC61524.1DNApolymerasebeta[Trypanosomacruzi]	111	133	yes	yes	2;3;4	2.9718e-203	306.66	51706000000			2	37	2	102;103;104;105;106;107;108;109;110;111;112;113;114;115;116;117;118;119;120;121;122;123;124;125;126;127;128;129;130;131;132;133;134;135;136;137;138;139;140;141;142;143;144;145;146;147;148;149;150;151;152;153;154;155;156;157;158;159;160;161;162;163;164;165;166;167;168;169
ADRIQLTDQQR	FDREGIFTVEELIEKADRIQLTDQQRVGVK	LIEKADRIQLTDQQRVGVKYFHDINEKIPM	K	A	D	Q	R	V	1	2	0	2	0	3	0	0	0	1	1	0	0	0	0	0	1	0	0	0	0	0	11	1	1342.7	RNC61524.1DNApolymerasebeta[Trypanosomacruzi]	RNC61524.1DNApolymerasebeta[Trypanosomacruzi]	131	141	yes	yes	2;3	8.5901e-41	200.76	6647800000			6	37	7	174;175;176;177;178
AEEIIMTGK	DLERFPGFGSKLLKKAEEIIMTGKLEELEK	SKLLKKAEEIIMTGKLEELEKKTKPKLKAI	K	A	E	G	K	L	1	0	0	0	0	0	2	1	0	2	0	1	1	0	0	0	1	0	0	0	0	0	9	0	990.506	RNC61524.1DNApolymerasebeta[Trypanosomacruzi]	RNC61524.1DNApolymerasebeta[Trypanosomacruzi]	75	83	yes	yes	1;2	1.6251e-15	155.1	9406800000			10	37	11;12	183;184;185;186;187;188;189;190;191
AEEIIMTGKLEELEK	DLERFPGFGSKLLKKAEEIIMTGKLEELEK	AEEIIMTGKLEELEKKTKPKLKAIQELTQV	K	A	E	E	K	K	1	0	0	0	0	0	5	1	0	2	2	2	1	0	0	0	1	0	0	0	0	0	15	1	1731.9	RNC61524.1DNApolymerasebeta[Trypanosomacruzi]	RNC61524.1DNApolymerasebeta[Trypanosomacruzi]	75	89	yes	yes	2;3	1.5283e-76	229.97	19927000000			11	37	13;14	192;193;194;195;196;197;198;199;200;201
AEEIIMTGKLEELEKK	DLERFPGFGSKLLKKAEEIIMTGKLEELEK	EEIIMTGKLEELEKKTKPKLKAIQELTQVH	K	A	E	K	K	T	1	0	0	0	0	0	5	1	0	2	2	3	1	0	0	0	1	0	0	0	0	0	16	2	1859.99	RNC61524.1DNApolymerasebeta[Trypanosomacruzi]	RNC61524.1DNApolymerasebeta[Trypanosomacruzi]	75	90	yes	yes	2;3;4	2.8179e-105	260.94	25114000000			12	37	15;16	202;203;204;205;206;207
AIQELTQVHGFGPR	GKLEELEKKTKPKLKAIQELTQVHGFGPRA	KAIQELTQVHGFGPRAAAALFDREGIFTVE	K	A	I	P	R	A	1	1	0	0	0	2	1	2	1	1	1	0	0	1	1	0	1	0	0	1	0	0	14	0	1551.82	RNC61524.1DNApolymerasebeta[Trypanosomacruzi]	RNC61524.1DNApolymerasebeta[Trypanosomacruzi]	97	110	yes	yes	2;3;4	3.1949e-158	291.24	95562000000			18	37	22	213;214;215;216;217;218;219;220;221;222;223;224;225;226;227;228;229;230;231;232;233;234;235;236;237;238;239;240;241;242;243;244;245;246;247;248;249;250;251;252;253;254;255;256;257;258;259;260;261;262;263;264;265;266;267;268;269;270;271;272;273;274;275;276;277;278;279;280;281;282;283;284;285;286;287;288;289;290;291;292;293;294;295;296;297;298;299;300;301;302;303;304;305;306
AIQELTQVHGFGPRAAAALFDR	GKLEELEKKTKPKLKAIQELTQVHGFGPRA	VHGFGPRAAAALFDREGIFTVEELIEKADR	K	A	I	D	R	E	5	2	0	1	0	2	1	2	1	1	2	0	0	2	1	0	1	0	0	1	0	0	22	1	2367.24	RNC61524.1DNApolymerasebeta[Trypanosomacruzi]	RNC61524.1DNApolymerasebeta[Trypanosomacruzi]	97	118	yes	yes	3;4	3.2963e-46	179.19	264010000			19	37	23	307;308;309
AIQELTQVHGFGPRAAAALFDREGIFTVEELIEK	GKLEELEKKTKPKLKAIQELTQVHGFGPRA	FDREGIFTVEELIEKADRIQLTDQQRVGVK	K	A	I	E	K	A	5	2	0	1	0	2	5	3	1	3	3	1	0	3	1	0	2	0	0	2	0	0	34	2	3754.97	RNC61524.1DNApolymerasebeta[Trypanosomacruzi]	RNC61524.1DNApolymerasebeta[Trypanosomacruzi]	97	130	yes	yes	4	1.1284e-15	84.58	56736000			20	37	24	310
ALNSLKTNLDLPLR	NNALGEKYKVQSYIRALNSLKTNLDLPLRT	RALNSLKTNLDLPLRTVEDLERFPGFGSKL	R	A	L	L	R	T	1	1	2	1	0	0	0	0	0	0	5	1	0	0	1	1	1	0	0	0	0	0	14	1	1566.91	RNC61524.1DNApolymerasebeta[Trypanosomacruzi]	RNC61524.1DNApolymerasebeta[Trypanosomacruzi]	43	56	yes	yes	2;3	6.272e-99	255.41	10934000000			25	37	29;30	315;316;317;318;319;320;321
DVFDVLGMPFAK	KEELEVKRVHVTCEKDVFDVLGMPFAKPEN	CEKDVFDVLGMPFAKPENRDP_________	K	D	V	A	K	P	1	0	0	2	0	0	0	1	0	0	1	1	1	2	1	0	0	0	0	2	0	0	12	0	1337.67	RNC61524.1DNApolymerasebeta[Trypanosomacruzi]	RNC61524.1DNApolymerasebeta[Trypanosomacruzi]	386	397	yes	yes	2	5.3131e-06	118.71	523090000			45	37	50;51	348;349
DVFDVLGMPFAKPENR	KEELEVKRVHVTCEKDVFDVLGMPFAKPEN	VFDVLGMPFAKPENRDP_____________	K	D	V	N	R	D	1	1	1	2	0	0	1	1	0	0	1	1	1	2	2	0	0	0	0	2	0	0	16	1	1833.91	RNC61524.1DNApolymerasebeta[Trypanosomacruzi]	RNC61524.1DNApolymerasebeta[Trypanosomacruzi]	386	401	yes	yes	2;3;4	2.3397e-45	190.85	12163000000			46	37	52;53	350;351;352;353;354;355;356;357;358;359;360;361;362;363;364;365;366;367;368;369;370
DVFDVLGMPFAKPENRDP	KEELEVKRVHVTCEKDVFDVLGMPFAKPEN	DVLGMPFAKPENRDP_______________	K	D	V	D	P	-	1	1	1	3	0	0	1	1	0	0	1	1	1	2	3	0	0	0	0	2	0	0	18	2	2045.99	RNC61524.1DNApolymerasebeta[Trypanosomacruzi]	RNC61524.1DNApolymerasebeta[Trypanosomacruzi]	386	403	yes	yes	2;3;4	2.521e-63	205.61	9527800000			47	37	54;55	371;372;373;374;375;376;377;378;379;380;381;382;383;384;385;386;387;388
EELEVKR	ISGHSAKMETLGLTKEELEVKRVHVTCEKD	METLGLTKEELEVKRVHVTCEKDVFDVLGM	K	E	E	K	R	V	0	1	0	0	0	0	3	0	0	0	1	1	0	0	0	0	0	0	0	1	0	0	7	1	901.487	RNC61524.1DNApolymerasebeta[Trypanosomacruzi]	RNC61524.1DNApolymerasebeta[Trypanosomacruzi]	372	378	yes	yes	1;2	7.6448e-26	170.94	12325000000			51	37	59	392;393;394;395
EGIFTVEELIEK	VHGFGPRAAAALFDREGIFTVEELIEKADR	FDREGIFTVEELIEKADRIQLTDQQRVGVK	R	E	G	E	K	A	0	0	0	0	0	0	4	1	0	2	1	1	0	1	0	0	1	0	0	1	0	0	12	0	1405.73	RNC61524.1DNApolymerasebeta[Trypanosomacruzi]	RNC61524.1DNApolymerasebeta[Trypanosomacruzi]	119	130	yes	yes	2	3.2007e-23	166.97	81412000000			52	37	60	396;397;398;399;400;401;402;403;404;405;406;407;408;409;410;411;412;413;414
EGIFTVEELIEKADR	VHGFGPRAAAALFDREGIFTVEELIEKADR	EGIFTVEELIEKADRIQLTDQQRVGVKYFH	R	E	G	D	R	I	1	1	0	1	0	0	4	1	0	2	1	1	0	1	0	0	1	0	0	1	0	0	15	1	1747.9	RNC61524.1DNApolymerasebeta[Trypanosomacruzi]	RNC61524.1DNApolymerasebeta[Trypanosomacruzi]	119	133	yes	yes	2;3	8.0961e-163	291.5	74249000000			53	37	61	415;416;417;418;419;420;421;422;423;424;425;426;427;428;429;430;431;432;433;434;435;436;437;438;439;440;441;442;443;444;445;446;447;448;449;450;451;452;453;454;455;456;457;458;459;460
EGIFTVEELIEKADRIQLTDQQR	VHGFGPRAAAALFDREGIFTVEELIEKADR	LIEKADRIQLTDQQRVGVKYFHDINEKIPM	R	E	G	Q	R	V	1	2	0	2	0	3	4	1	0	3	2	1	0	1	0	0	2	0	0	1	0	0	23	2	2730.42	RNC61524.1DNApolymerasebeta[Trypanosomacruzi]	RNC61524.1DNApolymerasebeta[Trypanosomacruzi]	119	141	yes	yes	2;3;4	1.2436e-17	122	2832000000			54	37	62	461;462;463;464;465;466;467;468;469;470
EMADLNNALGEK	RFNPDSRENIIRIFKEMADLNNALGEKYKV	IFKEMADLNNALGEKYKVQSYIRALNSLKT	K	E	M	E	K	Y	2	0	2	1	0	0	2	1	0	0	2	1	1	0	0	0	0	0	0	0	0	0	12	0	1303.61	RNC61524.1DNApolymerasebeta[Trypanosomacruzi]	RNC61524.1DNApolymerasebeta[Trypanosomacruzi]	23	34	yes	yes	1;2	3.6364e-68	231.54	50897000000			60	37	68;69	478;479;480;481;482;483;484;485;486;487;488;489;490;491;492;493;494;495;496;497;498;499
EMADLNNALGEKYK	RFNPDSRENIIRIFKEMADLNNALGEKYKV	KEMADLNNALGEKYKVQSYIRALNSLKTNL	K	E	M	Y	K	V	2	0	2	1	0	0	2	1	0	0	2	2	1	0	0	0	0	0	1	0	0	0	14	1	1594.77	RNC61524.1DNApolymerasebeta[Trypanosomacruzi]	RNC61524.1DNApolymerasebeta[Trypanosomacruzi]	23	36	yes	yes	2;3	2.4634e-136	277.96	2168100000			61	37	70;71	500;501;502;503;504;505;506
EMADLNNALGEKYKVQSYIR	RFNPDSRENIIRIFKEMADLNNALGEKYKV	NNALGEKYKVQSYIRALNSLKTNLDLPLRT	K	E	M	I	R	A	2	1	2	1	0	1	2	1	0	1	2	2	1	0	0	1	0	0	2	1	0	0	20	2	2341.17	RNC61524.1DNApolymerasebeta[Trypanosomacruzi]	RNC61524.1DNApolymerasebeta[Trypanosomacruzi]	23	42	yes	yes	2;3;4	1.0819e-65	216.37	675370000			62	37	72;73	507;508;509;510;511
ENIIRIFKEMADLNNALGEK	______________________________	IFKEMADLNNALGEKYKVQSYIRALNSLKT	R	E	N	E	K	Y	2	1	3	1	0	0	3	1	0	3	2	2	1	1	0	0	0	0	0	0	0	0	20	2	2317.21	RNC61524.1DNApolymerasebeta[Trypanosomacruzi]	RNC61524.1DNApolymerasebeta[Trypanosomacruzi]	15	34	yes	yes	4	0.034139	29.729	3061400			63	37	74	512
FNPDSRENIIR	______________________________	TFWRFNPDSRENIIRIFKEMADLNNALGEK	R	F	N	I	R	I	0	2	2	1	0	0	1	0	0	2	0	0	0	1	1	1	0	0	0	0	0	0	11	1	1359.69	RNC61524.1DNApolymerasebeta[Trypanosomacruzi]	RNC61524.1DNApolymerasebeta[Trypanosomacruzi]	9	19	yes	yes	2;3	2.8713e-55	166.09	3837900000			78	37	90;91	536;537;538;539;540;541;542;543
FPGFGSK	TNLDLPLRTVEDLERFPGFGSKLLKKAEEI	RTVEDLERFPGFGSKLLKKAEEIIMTGKLE	R	F	P	S	K	L	0	0	0	0	0	0	0	2	0	0	0	1	0	2	1	1	0	0	0	0	0	0	7	0	738.37	RNC61524.1DNApolymerasebeta[Trypanosomacruzi]	RNC61524.1DNApolymerasebeta[Trypanosomacruzi]	64	70	yes	yes	1;2	5.3767e-11	119.56	57881000000			79	37	92	544;545;546;547;548;549;550
FPGFGSKLLK	TNLDLPLRTVEDLERFPGFGSKLLKKAEEI	EDLERFPGFGSKLLKKAEEIIMTGKLEELE	R	F	P	L	K	K	0	0	0	0	0	0	0	2	0	0	2	2	0	2	1	1	0	0	0	0	0	0	10	1	1092.63	RNC61524.1DNApolymerasebeta[Trypanosomacruzi]	RNC61524.1DNApolymerasebeta[Trypanosomacruzi]	64	73	yes	yes	3	0.00093268	83.499	860560000			80	37	93	551
FPGFGSKLLKK	TNLDLPLRTVEDLERFPGFGSKLLKKAEEI	DLERFPGFGSKLLKKAEEIIMTGKLEELEK	R	F	P	K	K	A	0	0	0	0	0	0	0	2	0	0	2	3	0	2	1	1	0	0	0	0	0	0	11	2	1220.73	RNC61524.1DNApolymerasebeta[Trypanosomacruzi]	RNC61524.1DNApolymerasebeta[Trypanosomacruzi]	64	74	yes	yes	3	0.00079307	86.014	99210000			81	37	94	552
GYLLNEYGLFK	SKNFNVIMRQAAISKGYLLNEYGLFKLGSP	AISKGYLLNEYGLFKLGSPEEVKALQERVR	K	G	Y	F	K	L	0	0	1	0	0	0	1	2	0	0	3	1	0	1	0	0	0	0	2	0	0	0	11	0	1315.68	RNC61524.1DNApolymerasebeta[Trypanosomacruzi]	RNC61524.1DNApolymerasebeta[Trypanosomacruzi]	301	311	yes	yes	2	1.9294e-55	179.37	1459300000			109	37	123;124	585;586;587;588;589;590;591;592;593;594;595;596;597;598;599;600;601;602;603;604;605;606;607;608;609;610;611;612;613;614;615;616;617;618;619;620;621;622;623;624;625;626;627;628;629;630;631;632;633;634
GYLLNEYGLFKLGSPEEVK	SKNFNVIMRQAAISKGYLLNEYGLFKLGSP	NEYGLFKLGSPEEVKALQERVRANKIAGTK	K	G	Y	V	K	A	0	0	1	0	0	0	3	3	0	0	4	2	0	1	1	1	0	0	2	1	0	0	19	1	2155.12	RNC61524.1DNApolymerasebeta[Trypanosomacruzi]	RNC61524.1DNApolymerasebeta[Trypanosomacruzi]	301	319	yes	yes	2;3	1.4681e-108	248.68	7084700000			110	37	125	635;636;637;638;639;640
GYLLNEYGLFKLGSPEEVKALQER	SKNFNVIMRQAAISKGYLLNEYGLFKLGSP	FKLGSPEEVKALQERVRANKIAGTKNSPTD	K	G	Y	E	R	V	1	1	1	0	0	1	4	3	0	0	5	2	0	1	1	1	0	0	2	1	0	0	24	2	2752.44	RNC61524.1DNApolymerasebeta[Trypanosomacruzi]	RNC61524.1DNApolymerasebeta[Trypanosomacruzi]	301	324	yes	yes	3	0.0031474	43.523	18658000			111	37	126	641
HPFSGDVDAILAR	TSDYEIQVCGSYRRRHPFSGDVDAILARTL	RRHPFSGDVDAILARTLSAPPLDCPVTNTG	R	H	P	A	R	T	2	1	0	2	0	0	0	1	1	1	1	0	0	1	1	1	0	0	0	1	0	0	13	0	1396.71	RNC61524.1DNApolymerasebeta[Trypanosomacruzi]	RNC61524.1DNApolymerasebeta[Trypanosomacruzi]	190	202	yes	yes	1;2;3	1.0008e-136	280.71	87912000000			120	37	135	654;655;656;657;658;659;660;661;662;663;664;665;666;667;668;669;670;671;672;673;674;675;676;677;678;679;680;681;682;683;684;685;686;687;688;689;690;691;692;693;694;695;696;697;698;699;700;701;702;703;704;705;706;707;708;709;710;711;712;713;714;715;716;717;718;719;720;721;722;723;724;725;726;727;728;729;730;731;732;733;734;735;736;737;738;739;740;741;742;743;744;745;746;747;748;749;750;751;752;753…
IAGTKNSPTDAASDPTVEEGVDPVVSVISGHSAK	PEEVKALQERVRANKIAGTKNSPTDAASDP	GVDPVVSVISGHSAKMETLGLTKEELEVKR	K	I	A	A	K	M	4	0	1	3	0	0	2	3	1	2	0	2	0	0	3	5	3	0	0	5	0	0	34	1	3334.65	RNC61524.1DNApolymerasebeta[Trypanosomacruzi]	RNC61524.1DNApolymerasebeta[Trypanosomacruzi]	330	363	yes	yes	3;4	5.1808e-116	225.07	2745900000			122	37	137;138	785;786;787;788;789;790;791
IFKEMADLNNALGEK	TFWRFNPDSRENIIRIFKEMADLNNALGEK	IFKEMADLNNALGEKYKVQSYIRALNSLKT	R	I	F	E	K	Y	2	0	2	1	0	0	2	1	0	1	2	2	1	1	0	0	0	0	0	0	0	0	15	1	1691.86	RNC61524.1DNApolymerasebeta[Trypanosomacruzi]	RNC61524.1DNApolymerasebeta[Trypanosomacruzi]	20	34	yes	yes	2;3	4.4122e-121	261.41	68465000000			125	37	141;142	794;795;796;797;798;799;800;801;802;803;804;805;806;807;808;809;810;811;812;813;814;815;816;817;818;819;820;821;822;823;824;825;826;827;828;829;830;831;832;833;834;835;836;837;838;839;840;841;842;843;844;845;846;847;848;849;850;851;852;853;854;855;856;857;858;859;860;861;862;863;864;865;866;867;868;869;870;871;872;873;874;875;876;877;878;879
IFKEMADLNNALGEKYK	TFWRFNPDSRENIIRIFKEMADLNNALGEK	KEMADLNNALGEKYKVQSYIRALNSLKTNL	R	I	F	Y	K	V	2	0	2	1	0	0	2	1	0	1	2	3	1	1	0	0	0	0	1	0	0	0	17	2	1983.01	RNC61524.1DNApolymerasebeta[Trypanosomacruzi]	RNC61524.1DNApolymerasebeta[Trypanosomacruzi]	20	36	yes	yes	2;3;4	2.065e-212	333.11	4533900000			126	37	143;144	880;881;882;883;884;885;886;887
IPMHESVLHENFLR	QQRVGVKYFHDINEKIPMHESVLHENFLRE	KIPMHESVLHENFLRESVQARLTSDYEIQV	K	I	P	L	R	E	0	1	1	0	0	0	2	0	2	1	2	0	1	1	1	1	0	0	0	1	0	0	14	0	1720.87	RNC61524.1DNApolymerasebeta[Trypanosomacruzi]	RNC61524.1DNApolymerasebeta[Trypanosomacruzi]	154	167	yes	yes	2;3;4	5.5423e-137	281.83	171960000000			134	37	153;154	902;903;904;905;906;907;908;909;910;911;912;913;914;915;916;917;918;919;920;921;922;923;924;925;926;927;928;929;930;931;932;933;934;935;936;937;938;939;940;941;942;943;944;945;946;947;948;949;950;951;952;953;954;955;956;957;958;959;960;961;962;963;964;965;966;967;968;969;970;971;972;973;974;975;976;977;978;979;980;981;982;983;984;985;986;987;988;989;990;991;992;993;994;995;996;997;998;999;1000;10…
IPMHESVLHENFLRESVQAR	QQRVGVKYFHDINEKIPMHESVLHENFLRE	SVLHENFLRESVQARLTSDYEIQVCGSYRR	K	I	P	A	R	L	1	2	1	0	0	1	3	0	2	1	2	0	1	1	1	2	0	0	0	2	0	0	20	1	2391.21	RNC61524.1DNApolymerasebeta[Trypanosomacruzi]	RNC61524.1DNApolymerasebeta[Trypanosomacruzi]	154	173	yes	yes	3;4	1.254e-16	132.59	151060000			135	37	155	1038;1039
IQLTDQQR	EGIFTVEELIEKADRIQLTDQQRVGVKYFH	LIEKADRIQLTDQQRVGVKYFHDINEKIPM	R	I	Q	Q	R	V	0	1	0	1	0	3	0	0	0	1	1	0	0	0	0	0	1	0	0	0	0	0	8	0	1000.53	RNC61524.1DNApolymerasebeta[Trypanosomacruzi]	RNC61524.1DNApolymerasebeta[Trypanosomacruzi]	134	141	yes	yes	2	9.441e-53	208.54	35228000000			136	37	156	1040;1041;1042;1043;1044;1045;1046;1047;1048;1049;1050;1051;1052;1053;1054;1055;1056;1057;1058;1059;1060;1061;1062;1063;1064;1065;1066;1067;1068;1069;1070;1071;1072;1073;1074;1075;1076;1077;1078;1079;1080;1081;1082;1083;1084;1085;1086;1087;1088;1089;1090;1091;1092;1093;1094;1095;1096;1097;1098;1099;1100;1101;1102;1103;1104;1105;1106;1107;1108
IQLTDQQRVGVK	EGIFTVEELIEKADRIQLTDQQRVGVKYFH	ADRIQLTDQQRVGVKYFHDINEKIPMHESV	R	I	Q	V	K	Y	0	1	0	1	0	3	0	1	0	1	1	1	0	0	0	0	1	0	0	2	0	0	12	1	1383.78	RNC61524.1DNApolymerasebeta[Trypanosomacruzi]	RNC61524.1DNApolymerasebeta[Trypanosomacruzi]	134	145	yes	yes	2	1.2202e-65	225.22	63914000			137	37	157	1109
KAEEIIMTGK	EDLERFPGFGSKLLKKAEEIIMTGKLEELE	SKLLKKAEEIIMTGKLEELEKKTKPKLKAI	K	K	A	G	K	L	1	0	0	0	0	0	2	1	0	2	0	2	1	0	0	0	1	0	0	0	0	0	10	1	1118.6	RNC61524.1DNApolymerasebeta[Trypanosomacruzi]	RNC61524.1DNApolymerasebeta[Trypanosomacruzi]	74	83	yes	yes	2;3	1.7283e-95	256.24	35068000000			141	37	161;162	1114;1115;1116;1117;1118;1119;1120;1121;1122;1123;1124;1125
KAEEIIMTGKLEELEK	EDLERFPGFGSKLLKKAEEIIMTGKLEELE	AEEIIMTGKLEELEKKTKPKLKAIQELTQV	K	K	A	E	K	K	1	0	0	0	0	0	5	1	0	2	2	3	1	0	0	0	1	0	0	0	0	0	16	2	1859.99	RNC61524.1DNApolymerasebeta[Trypanosomacruzi]	RNC61524.1DNApolymerasebeta[Trypanosomacruzi]	74	89	yes	yes	2;3;4	9.5011e-298	369.5	102250000000			142	37	163;164	1126;1127;1128;1129;1130;1131;1132;1133;1134;1135;1136;1137;1138;1139;1140;1141;1142;1143;1144;1145;1146;1147;1148;1149;1150;1151;1152;1153;1154;1155;1156;1157;1158;1159;1160;1161;1162;1163
LEELEKK	SKLLKKAEEIIMTGKLEELEKKTKPKLKAI	EEIIMTGKLEELEKKTKPKLKAIQELTQVH	K	L	E	K	K	T	0	0	0	0	0	0	3	0	0	0	2	2	0	0	0	0	0	0	0	0	0	0	7	1	887.496	RNC61524.1DNApolymerasebeta[Trypanosomacruzi]	RNC61524.1DNApolymerasebeta[Trypanosomacruzi]	84	90	yes	yes	2	4.5126e-11	117.93	14201000000			157	37	179	1180;1181;1182;1183
LGSPEEVK	AISKGYLLNEYGLFKLGSPEEVKALQERVR	NEYGLFKLGSPEEVKALQERVRANKIAGTK	K	L	G	V	K	A	0	0	0	0	0	0	2	1	0	0	1	1	0	0	1	1	0	0	0	1	0	0	8	0	857.449	RNC61524.1DNApolymerasebeta[Trypanosomacruzi]	RNC61524.1DNApolymerasebeta[Trypanosomacruzi]	312	319	yes	yes	1;2	2.1033e-13	127.12	63667000000			162	37	184	1188;1189;1190;1191;1192;1193;1194;1195;1196;1197;1198;1199;1200;1201;1202;1203;1204
LGSPEEVKALQER	AISKGYLLNEYGLFKLGSPEEVKALQERVR	FKLGSPEEVKALQERVRANKIAGTKNSPTD	K	L	G	E	R	V	1	1	0	0	0	1	3	1	0	0	2	1	0	0	1	1	0	0	0	1	0	0	13	1	1454.77	RNC61524.1DNApolymerasebeta[Trypanosomacruzi]	RNC61524.1DNApolymerasebeta[Trypanosomacruzi]	312	324	yes	yes	2;3	1.1221e-41	196.16	3059600000			163	37	185	1205;1206;1207
LGSPEEVKALQERVR	AISKGYLLNEYGLFKLGSPEEVKALQERVR	LGSPEEVKALQERVRANKIAGTKNSPTDAA	K	L	G	V	R	A	1	2	0	0	0	1	3	1	0	0	2	1	0	0	1	1	0	0	0	2	0	0	15	2	1709.94	RNC61524.1DNApolymerasebeta[Trypanosomacruzi]	RNC61524.1DNApolymerasebeta[Trypanosomacruzi]	312	326	yes	yes	2;3;4	2.5967e-08	114.56	358420000			164	37	186	1208;1209;1210
LIEARSVPTALLTFTGSK	NGTTKHYKARRVDIRLIEARSVPTALLTFT	ARSVPTALLTFTGSKNFNVIMRQAAISKGY	R	L	I	S	K	N	2	1	0	0	0	0	1	1	0	1	3	1	0	1	1	2	3	0	0	1	0	0	18	1	1903.08	RNC61524.1DNApolymerasebeta[Trypanosomacruzi]	RNC61524.1DNApolymerasebeta[Trypanosomacruzi]	270	287	yes	yes	2;3	9.381e-63	205.95	462530000			165	37	187	1211;1212;1213;1214;1215
LKAIQELTQVHGFGPR	MTGKLEELEKKTKPKLKAIQELTQVHGFGP	KAIQELTQVHGFGPRAAAALFDREGIFTVE	K	L	K	P	R	A	1	1	0	0	0	2	1	2	1	1	2	1	0	1	1	0	1	0	0	1	0	0	16	1	1792.99	RNC61524.1DNApolymerasebeta[Trypanosomacruzi]	RNC61524.1DNApolymerasebeta[Trypanosomacruzi]	95	110	yes	yes	2;3;4	1.1186e-186	314.35	17518000000			166	37	188	1216;1217;1218;1219;1220;1221;1222;1223;1224;1225;1226;1227;1228;1229
LLKKAEEIIMTGK	RTVEDLERFPGFGSKLLKKAEEIIMTGKLE	SKLLKKAEEIIMTGKLEELEKKTKPKLKAI	K	L	L	G	K	L	1	0	0	0	0	0	2	1	0	2	2	3	1	0	0	0	1	0	0	0	0	0	13	2	1472.86	RNC61524.1DNApolymerasebeta[Trypanosomacruzi]	RNC61524.1DNApolymerasebeta[Trypanosomacruzi]	71	83	yes	yes	3	1.1343e-10	138.77	20667000			171	37	193	1236
LTSDYEIQVCGSYR	SVLHENFLRESVQARLTSDYEIQVCGSYRR	RLTSDYEIQVCGSYRRRHPFSGDVDAILAR	R	L	T	Y	R	R	0	1	0	1	1	1	1	1	0	1	1	0	0	0	0	2	1	0	2	1	0	0	14	0	1689.77	RNC61524.1DNApolymerasebeta[Trypanosomacruzi]	RNC61524.1DNApolymerasebeta[Trypanosomacruzi]	174	187	yes	yes	2;3	1.0737e-179	283.52	23100000000			183	37	205;206	1253;1254;1255;1256;1257;1258;1259;1260;1261;1262;1263;1264;1265;1266;1267;1268;1269;1270;1271;1272;1273;1274;1275;1276;1277;1278;1279;1280;1281;1282;1283;1284;1285;1286;1287;1288;1289;1290;1291;1292;1293;1294;1295;1296;1297;1298;1299;1300;1301;1302;1303;1304;1305;1306;1307;1308;1309;1310;1311
LTSDYEIQVCGSYRR	SVLHENFLRESVQARLTSDYEIQVCGSYRR	LTSDYEIQVCGSYRRRHPFSGDVDAILART	R	L	T	R	R	R	0	2	0	1	1	1	1	1	0	1	1	0	0	0	0	2	1	0	2	1	0	0	15	1	1845.87	RNC61524.1DNApolymerasebeta[Trypanosomacruzi]	RNC61524.1DNApolymerasebeta[Trypanosomacruzi]	174	188	yes	yes	2;3	2.6227e-88	245.94	3778700000			184	37	207;208	1312;1313;1314;1315;1316;1317;1318;1319;1320
METLGLTK	GVDPVVSVISGHSAKMETLGLTKEELEVKR	ISGHSAKMETLGLTKEELEVKRVHVTCEKD	K	M	E	T	K	E	0	0	0	0	0	0	1	1	0	0	2	1	1	0	0	0	2	0	0	0	0	0	8	0	891.474	RNC61524.1DNApolymerasebeta[Trypanosomacruzi]	RNC61524.1DNApolymerasebeta[Trypanosomacruzi]	364	371	yes	yes	1;2	3.48e-17	121.05	14873000000			189	37	213;214	1325;1326;1327;1328;1329;1330;1331;1332;1333;1334
METLGLTKEELEVK	GVDPVVSVISGHSAKMETLGLTKEELEVKR	KMETLGLTKEELEVKRVHVTCEKDVFDVLG	K	M	E	V	K	R	0	0	0	0	0	0	4	1	0	0	3	2	1	0	0	0	2	0	0	1	0	0	14	1	1618.85	RNC61524.1DNApolymerasebeta[Trypanosomacruzi]	RNC61524.1DNApolymerasebeta[Trypanosomacruzi]	364	377	yes	yes	1;2;3;4	1.6599e-136	281.25	115710000000			190	37	215;216	1335;1336;1337;1338;1339;1340;1341;1342;1343;1344;1345;1346;1347;1348;1349;1350;1351;1352;1353;1354;1355;1356;1357;1358;1359;1360;1361;1362;1363;1364;1365;1366;1367;1368
METLGLTKEELEVKR	GVDPVVSVISGHSAKMETLGLTKEELEVKR	METLGLTKEELEVKRVHVTCEKDVFDVLGM	K	M	E	K	R	V	0	1	0	0	0	0	4	1	0	0	3	2	1	0	0	0	2	0	0	1	0	0	15	2	1774.95	RNC61524.1DNApolymerasebeta[Trypanosomacruzi]	RNC61524.1DNApolymerasebeta[Trypanosomacruzi]	364	378	yes	yes	2;3;4	3.8622e-238	340.57	151720000000			191	37	217;218	1369;1370;1371;1372;1373;1374;1375;1376;1377;1378;1379;1380;1381;1382;1383;1384;1385;1386;1387;1388;1389;1390;1391;1392;1393;1394;1395;1396;1397;1398;1399;1400;1401;1402;1403;1404;1405;1406;1407;1408;1409;1410;1411;1412;1413;1414;1415;1416;1417;1418;1419
NFNVIMR	ARSVPTALLTFTGSKNFNVIMRQAAISKGY	LLTFTGSKNFNVIMRQAAISKGYLLNEYGL	K	N	F	M	R	Q	0	1	2	0	0	0	0	0	0	1	0	0	1	1	0	0	0	0	0	1	0	0	7	0	892.459	RNC61524.1DNApolymerasebeta[Trypanosomacruzi]	RNC61524.1DNApolymerasebeta[Trypanosomacruzi]	288	294	yes	yes	1;2	1.5521e-48	170.96	113840000000			197	37	227;228	1428;1429;1430;1431;1432;1433;1434;1435;1436;1437;1438;1439;1440;1441;1442;1443;1444;1445;1446;1447;1448;1449;1450;1451;1452;1453;1454;1455;1456;1457;1458;1459;1460;1461;1462;1463;1464;1465;1466;1467;1468;1469;1470;1471;1472;1473;1474;1475;1476;1477;1478;1479;1480;1481;1482;1483;1484;1485;1486;1487;1488;1489;1490;1491;1492;1493;1494;1495;1496;1497;1498;1499;1500;1501;1502;1503;1504;1505;1506;1507…
NSPTDAASDPTVEEGVDPVVSVISGHSAK	ALQERVRANKIAGTKNSPTDAASDPTVEEG	GVDPVVSVISGHSAKMETLGLTKEELEVKR	K	N	S	A	K	M	3	0	1	3	0	0	2	2	1	1	0	1	0	0	3	5	2	0	0	5	0	0	29	0	2864.37	RNC61524.1DNApolymerasebeta[Trypanosomacruzi]	RNC61524.1DNApolymerasebeta[Trypanosomacruzi]	335	363	yes	yes	2;3;4	0	359.5	30184000000			214	37	246;247	1567;1568;1569;1570;1571;1572;1573;1574;1575;1576;1577;1578;1579;1580;1581;1582;1583;1584;1585;1586;1587;1588;1589;1590;1591;1592;1593;1594;1595;1596;1597;1598;1599;1600;1601;1602;1603;1604;1605;1606;1607;1608;1609;1610;1611;1612;1613;1614;1615;1616;1617;1618;1619;1620;1621;1622;1623;1624;1625;1626;1627;1628;1629
NSPTDAASDPTVEEGVDPVVSVISGHSAKMETLGLTK	ALQERVRANKIAGTKNSPTDAASDPTVEEG	ISGHSAKMETLGLTKEELEVKRVHVTCEKD	K	N	S	T	K	E	3	0	1	3	0	0	3	3	1	1	2	2	1	0	3	5	4	0	0	5	0	0	37	1	3737.83	RNC61524.1DNApolymerasebeta[Trypanosomacruzi]	RNC61524.1DNApolymerasebeta[Trypanosomacruzi]	335	371	yes	yes	3;4	1.0502e-53	147.16	892620000			215	37	248;249	1630;1631;1632;1633
NSPTDAASDPTVEEGVDPVVSVISGHSAKMETLGLTKEELEVK	ALQERVRANKIAGTKNSPTDAASDPTVEEG	KMETLGLTKEELEVKRVHVTCEKDVFDVLG	K	N	S	V	K	R	3	0	1	3	0	0	6	3	1	1	3	3	1	0	3	5	4	0	0	6	0	0	43	2	4465.21	RNC61524.1DNApolymerasebeta[Trypanosomacruzi]	RNC61524.1DNApolymerasebeta[Trypanosomacruzi]	335	377	yes	yes	4;5	1.6524e-47	133.25	775410000			216	37	250;251	1634;1635;1636
NYLEATMAQGPLK	NTGVLGTLVDYLQERNYLEATMAQGPLKYM	ERNYLEATMAQGPLKYMGMGRLPPRTTNGT	R	N	Y	L	K	Y	2	0	1	0	0	1	1	1	0	0	2	1	1	0	1	0	1	0	1	0	0	0	13	0	1434.72	RNC61524.1DNApolymerasebeta[Trypanosomacruzi]	RNC61524.1DNApolymerasebeta[Trypanosomacruzi]	230	242	yes	yes	1;2;3	5.6725e-76	199.67	103370000000			220	37	257;258	1650;1651;1652;1653;1654;1655;1656;1657;1658;1659;1660;1661;1662;1663;1664;1665;1666;1667;1668;1669;1670;1671;1672;1673;1674;1675;1676;1677;1678;1679;1680;1681;1682;1683;1684;1685;1686;1687;1688;1689;1690;1691;1692;1693;1694;1695;1696;1697;1698;1699;1700;1701;1702;1703;1704;1705;1706;1707;1708;1709;1710;1711;1712;1713;1714;1715;1716;1717;1718;1719;1720;1721;1722;1723;1724;1725;1726;1727;1728;1729…
NYLEATMAQGPLKYMGMGR	NTGVLGTLVDYLQERNYLEATMAQGPLKYM	ATMAQGPLKYMGMGRLPPRTTNGTTKHYKA	R	N	Y	G	R	L	2	1	1	0	0	1	1	3	0	0	2	1	3	0	1	0	1	0	2	0	0	0	19	1	2130.01	RNC61524.1DNApolymerasebeta[Trypanosomacruzi]	RNC61524.1DNApolymerasebeta[Trypanosomacruzi]	230	248	yes	yes	2;3	2.5797e-50	194.7	1300000000			221	37	259;260;261;262	1746;1747;1748;1749;1750;1751;1752;1753;1754;1755;1756;1757
QAAISKGYLLNEYGLFK	LLTFTGSKNFNVIMRQAAISKGYLLNEYGL	AISKGYLLNEYGLFKLGSPEEVKALQERVR	R	Q	A	F	K	L	2	0	1	0	0	1	1	2	0	1	3	2	0	1	0	1	0	0	2	0	0	0	17	1	1914.03	RNC61524.1DNApolymerasebeta[Trypanosomacruzi]	RNC61524.1DNApolymerasebeta[Trypanosomacruzi]	295	311	yes	yes	2;3	2.8927e-59	214.72	5178100000			225	37	266	1762;1763
QAAISKGYLLNEYGLFKLGSPEEVK	LLTFTGSKNFNVIMRQAAISKGYLLNEYGL	NEYGLFKLGSPEEVKALQERVRANKIAGTK	R	Q	A	V	K	A	2	0	1	0	0	1	3	3	0	1	4	3	0	1	1	2	0	0	2	1	0	0	25	2	2753.46	RNC61524.1DNApolymerasebeta[Trypanosomacruzi]	RNC61524.1DNApolymerasebeta[Trypanosomacruzi]	295	319	yes	yes	3;4	1.5156e-18	111.93	66675000			226	37	267	1764;1765;1766
RHPFSGDVDAILAR	LTSDYEIQVCGSYRRRHPFSGDVDAILART	RRHPFSGDVDAILARTLSAPPLDCPVTNTG	R	R	H	A	R	T	2	2	0	2	0	0	0	1	1	1	1	0	0	1	1	1	0	0	0	1	0	0	14	1	1552.81	RNC61524.1DNApolymerasebeta[Trypanosomacruzi]	RNC61524.1DNApolymerasebeta[Trypanosomacruzi]	189	202	yes	yes	2;3;4	1.3071e-42	193.51	90959000000			241	37	282;283	1787;1788;1789;1790;1791;1792;1793;1794;1795;1796;1797;1798;1799;1800;1801;1802;1803;1804;1805;1806;1807;1808;1809;1810;1811;1812;1813;1814;1815;1816;1817;1818;1819;1820;1821;1822;1823;1824
RRHPFSGDVDAILAR	RLTSDYEIQVCGSYRRRHPFSGDVDAILAR	RRHPFSGDVDAILARTLSAPPLDCPVTNTG	R	R	R	A	R	T	2	3	0	2	0	0	0	1	1	1	1	0	0	1	1	1	0	0	0	1	0	0	15	2	1708.91	RNC61524.1DNApolymerasebeta[Trypanosomacruzi]	RNC61524.1DNApolymerasebeta[Trypanosomacruzi]	188	202	yes	yes	2;3;4	1.3362e-162	292.35	47192000000			244	37	286	1827;1828;1829;1830;1831;1832;1833;1834;1835;1836;1837;1838;1839;1840;1841;1842;1843;1844;1845;1846;1847;1848;1849;1850;1851;1852;1853
RTFWRFNPDSR	______________________________	______________________________	R	R	T	S	R	E	0	3	1	1	0	0	0	0	0	0	0	0	0	2	1	1	1	1	0	0	0	0	11	2	1480.73	RNC61524.1DNApolymerasebeta[Trypanosomacruzi]	RNC61524.1DNApolymerasebeta[Trypanosomacruzi]	4	14	yes	yes	3	0.00040427	105.95	38488000			245	37	287	1854
RVDIRLIEAR	PPRTTNGTTKHYKARRVDIRLIEARSVPTA	HYKARRVDIRLIEARSVPTALLTFTGSKNF	R	R	V	A	R	S	1	3	0	1	0	0	1	0	0	2	1	0	0	0	0	0	0	0	0	1	0	0	10	2	1239.74	RNC61524.1DNApolymerasebeta[Trypanosomacruzi]	RNC61524.1DNApolymerasebeta[Trypanosomacruzi]	265	274	yes	yes	3	2.0432e-09	131.12	135200000			246	37	288	1855
RVHVTCEKDVFDVLGMPFAK	KMETLGLTKEELEVKRVHVTCEKDVFDVLG	CEKDVFDVLGMPFAKPENRDP_________	K	R	V	A	K	P	1	1	0	2	1	0	1	1	1	0	1	2	1	2	1	0	1	0	0	4	0	0	20	2	2347.18	RNC61524.1DNApolymerasebeta[Trypanosomacruzi]	RNC61524.1DNApolymerasebeta[Trypanosomacruzi]	378	397	yes	yes	3;4	5.1371e-13	125.28	81995000			247	37	289	1856;1857
SVPTALLTFTGSK	HYKARRVDIRLIEARSVPTALLTFTGSKNF	ARSVPTALLTFTGSKNFNVIMRQAAISKGY	R	S	V	S	K	N	1	0	0	0	0	0	0	1	0	0	2	1	0	1	1	2	3	0	0	1	0	0	13	0	1320.73	RNC61524.1DNApolymerasebeta[Trypanosomacruzi]	RNC61524.1DNApolymerasebeta[Trypanosomacruzi]	275	287	yes	yes	2;3	4.52e-36	147.74	106180000000			283	37	325;326	1906;1907;1908;1909;1910;1911;1912;1913;1914;1915;1916;1917;1918;1919;1920;1921;1922;1923;1924;1925;1926;1927;1928;1929;1930;1931;1932;1933;1934;1935;1936;1937;1938;1939;1940;1941;1942;1943;1944;1945;1946;1947;1948;1949;1950;1951;1952;1953;1954;1955;1956;1957;1958;1959;1960;1961;1962;1963;1964;1965;1966;1967;1968;1969;1970;1971;1972;1973;1974;1975;1976;1977;1978;1979;1980;1981;1982;1983;1984;1985…
SVPTALLTFTGSKNFNVIMR	HYKARRVDIRLIEARSVPTALLTFTGSKNF	LLTFTGSKNFNVIMRQAAISKGYLLNEYGL	R	S	V	M	R	Q	1	1	2	0	0	0	0	1	0	1	2	1	1	2	1	2	3	0	0	2	0	0	20	1	2195.18	RNC61524.1DNApolymerasebeta[Trypanosomacruzi]	RNC61524.1DNApolymerasebeta[Trypanosomacruzi]	275	294	yes	yes	2;3;4	8.2662e-64	206.18	6585300000			284	37	327;328	1987;1988;1989;1990;1991;1992;1993;1994;1995;1996;1997;1998
SVPTALLTFTGSKNFNVIMRQAAISK	HYKARRVDIRLIEARSVPTALLTFTGSKNF	SKNFNVIMRQAAISKGYLLNEYGLFKLGSP	R	S	V	S	K	G	3	1	2	0	0	1	0	1	0	2	2	2	1	2	1	3	3	0	0	2	0	0	26	2	2793.52	RNC61524.1DNApolymerasebeta[Trypanosomacruzi]	RNC61524.1DNApolymerasebeta[Trypanosomacruzi]	275	300	yes	yes	3;4	5.7327e-24	114.21	111000000			285	37	329	1999;2000
TFWRFNPDSR	______________________________	______________________________	R	T	F	S	R	E	0	2	1	1	0	0	0	0	0	0	0	0	0	2	1	1	1	1	0	0	0	0	10	1	1324.63	RNC61524.1DNApolymerasebeta[Trypanosomacruzi]	RNC61524.1DNApolymerasebeta[Trypanosomacruzi]	5	14	yes	yes	3	0.00047205	97.911	39557000			292	37	336	2009
TNLDLPLR	KYKVQSYIRALNSLKTNLDLPLRTVEDLER	RALNSLKTNLDLPLRTVEDLERFPGFGSKL	K	T	N	L	R	T	0	1	1	1	0	0	0	0	0	0	3	0	0	0	1	0	1	0	0	0	0	0	8	0	940.534	RNC61524.1DNApolymerasebeta[Trypanosomacruzi]	RNC61524.1DNApolymerasebeta[Trypanosomacruzi]	49	56	yes	yes	2	2.1199e-64	203.57	70280000000			305	37	349	2036;2037;2038;2039;2040;2041;2042;2043;2044;2045;2046;2047;2048;2049;2050;2051;2052;2053;2054;2055;2056;2057;2058;2059;2060;2061;2062;2063;2064;2065;2066;2067;2068;2069;2070;2071;2072;2073;2074
TNLDLPLRTVEDLER	KYKVQSYIRALNSLKTNLDLPLRTVEDLER	TNLDLPLRTVEDLERFPGFGSKLLKKAEEI	K	T	N	E	R	F	0	2	1	2	0	0	2	0	0	0	4	0	0	0	1	0	2	0	0	1	0	0	15	1	1782.95	RNC61524.1DNApolymerasebeta[Trypanosomacruzi]	RNC61524.1DNApolymerasebeta[Trypanosomacruzi]	49	63	yes	yes	2;3	8.8658e-13	138.39	698450000			306	37	350	2075;2076;2077
TNLDLPLRTVEDLERFPGFGSK	KYKVQSYIRALNSLKTNLDLPLRTVEDLER	RTVEDLERFPGFGSKLLKKAEEIIMTGKLE	K	T	N	S	K	L	0	2	1	2	0	0	2	2	0	0	4	1	0	2	2	1	2	0	0	1	0	0	22	2	2503.31	RNC61524.1DNApolymerasebeta[Trypanosomacruzi]	RNC61524.1DNApolymerasebeta[Trypanosomacruzi]	49	70	yes	yes	2;3;4	8.5859e-28	155.22	321260000			307	37	351	2078;2079;2080;2081;2082;2083;2084
TVEDLER	RALNSLKTNLDLPLRTVEDLERFPGFGSKL	TNLDLPLRTVEDLERFPGFGSKLLKKAEEI	R	T	V	E	R	F	0	1	0	1	0	0	2	0	0	0	1	0	0	0	0	0	1	0	0	1	0	0	7	0	860.424	RNC61524.1DNApolymerasebeta[Trypanosomacruzi]	RNC61524.1DNApolymerasebeta[Trypanosomacruzi]	57	63	yes	yes	1;2	3.4514e-14	132.72	43861000000			313	37	357	2091;2092;2093;2094;2095
TVEDLERFPGFGSK	RALNSLKTNLDLPLRTVEDLERFPGFGSKL	RTVEDLERFPGFGSKLLKKAEEIIMTGKLE	R	T	V	S	K	L	0	1	0	1	0	0	2	2	0	0	1	1	0	2	1	1	1	0	0	1	0	0	14	1	1580.78	RNC61524.1DNApolymerasebeta[Trypanosomacruzi]	RNC61524.1DNApolymerasebeta[Trypanosomacruzi]	57	70	yes	yes	2;3;4	6.5823e-181	312.31	91916000000			314	37	358;359	2096;2097;2098;2099;2100;2101;2102;2103;2104;2105;2106;2107;2108;2109;2110;2111;2112;2113;2114;2115;2116;2117;2118;2119;2120;2121;2122;2123;2124;2125;2126;2127;2128;2129;2130;2131;2132;2133;2134;2135;2136;2137;2138;2139;2140;2141;2142;2143;2144;2145;2146;2147;2148;2149;2150;2151;2152;2153;2154;2155;2156;2157;2158;2159;2160;2161;2162;2163;2164;2165;2166;2167;2168;2169;2170;2171;2172;2173;2174;2175…
TVEDLERFPGFGSKLLK	RALNSLKTNLDLPLRTVEDLERFPGFGSKL	EDLERFPGFGSKLLKKAEEIIMTGKLEELE	R	T	V	L	K	K	0	1	0	1	0	0	2	2	0	0	3	2	0	2	1	1	1	0	0	1	0	0	17	2	1935.05	RNC61524.1DNApolymerasebeta[Trypanosomacruzi]	RNC61524.1DNApolymerasebeta[Trypanosomacruzi]	57	73	yes	yes	2;3;4	2.8166e-58	205.28	5597700000			315	37	360;361	2198;2199;2200;2201;2202
VDIRLIEAR	PRTTNGTTKHYKARRVDIRLIEARSVPTAL	HYKARRVDIRLIEARSVPTALLTFTGSKNF	R	V	D	A	R	S	1	2	0	1	0	0	1	0	0	2	1	0	0	0	0	0	0	0	0	1	0	0	9	1	1083.64	RNC61524.1DNApolymerasebeta[Trypanosomacruzi]	RNC61524.1DNApolymerasebeta[Trypanosomacruzi]	266	274	yes	yes	3	0.00053343	90.108	19525000			320	37	366	2214
VGVKYFHDINEK	LIEKADRIQLTDQQRVGVKYFHDINEKIPM	QQRVGVKYFHDINEKIPMHESVLHENFLRE	R	V	G	E	K	I	0	0	1	1	0	0	1	1	1	1	0	2	0	1	0	0	0	0	1	2	0	0	12	1	1447.75	RNC61524.1DNApolymerasebeta[Trypanosomacruzi]	RNC61524.1DNApolymerasebeta[Trypanosomacruzi]	142	153	yes	yes	2;3;4	6.8736e-201	328.29	3348200000			323	37	369	2218;2219;2220;2221
VGVKYFHDINEKIPMHESVLHENFLR	LIEKADRIQLTDQQRVGVKYFHDINEKIPM	KIPMHESVLHENFLRESVQARLTSDYEIQV	R	V	G	L	R	E	0	1	2	1	0	0	3	1	3	2	2	2	1	2	1	1	0	0	1	3	0	0	26	2	3150.61	RNC61524.1DNApolymerasebeta[Trypanosomacruzi]	RNC61524.1DNApolymerasebeta[Trypanosomacruzi]	142	167	yes	yes	3;4;5;6	6.5577e-146	270.46	1245900000			324	37	370;371	2222;2223;2224;2225;2226;2227;2228
VHVTCEKDVFDVLGMPFAK	METLGLTKEELEVKRVHVTCEKDVFDVLGM	CEKDVFDVLGMPFAKPENRDP_________	R	V	H	A	K	P	1	0	0	2	1	0	1	1	1	0	1	2	1	2	1	0	1	0	0	4	0	0	19	1	2191.08	RNC61524.1DNApolymerasebeta[Trypanosomacruzi]	RNC61524.1DNApolymerasebeta[Trypanosomacruzi]	379	397	yes	yes	2;3;4	1.654e-92	243.21	630880000			325	37	372;373	2229;2230;2231;2232;2233;2234
VHVTCEKDVFDVLGMPFAKPENR	METLGLTKEELEVKRVHVTCEKDVFDVLGM	VFDVLGMPFAKPENRDP_____________	R	V	H	N	R	D	1	1	1	2	1	0	2	1	1	0	1	2	1	2	2	0	1	0	0	4	0	0	23	2	2687.32	RNC61524.1DNApolymerasebeta[Trypanosomacruzi]	RNC61524.1DNApolymerasebeta[Trypanosomacruzi]	379	401	yes	yes	2;3;4;5	6.0104e-285	350.83	10720000000			326	37	374;375;376	2235;2236;2237;2238;2239;2240;2241;2242;2243;2244;2245;2246
VRANKIAGTK	FKLGSPEEVKALQERVRANKIAGTKNSPTD	ALQERVRANKIAGTKNSPTDAASDPTVEEG	R	V	R	T	K	N	2	1	1	0	0	0	0	1	0	1	0	2	0	0	0	0	1	0	0	1	0	0	10	2	1056.64	RNC61524.1DNApolymerasebeta[Trypanosomacruzi]	RNC61524.1DNApolymerasebeta[Trypanosomacruzi]	325	334	yes	yes	2	1.9032e-08	128.58	30320000			338	37	389	2261
YFHDINEK	ADRIQLTDQQRVGVKYFHDINEKIPMHESV	QQRVGVKYFHDINEKIPMHESVLHENFLRE	K	Y	F	E	K	I	0	0	1	1	0	0	1	0	1	1	0	1	0	1	0	0	0	0	1	0	0	0	8	0	1064.49	RNC61524.1DNApolymerasebeta[Trypanosomacruzi]	RNC61524.1DNApolymerasebeta[Trypanosomacruzi]	146	153	yes	yes	2;3	7.497e-31	178.65	28886000000			350	37	402	2276;2277;2278;2279;2280;2281;2282;2283;2284;2285;2286;2287;2288;2289;2290;2291;2292;2293;2294;2295;2296;2297;2298;2299;2300;2301;2302;2303;2304;2305;2306;2307;2308;2309;2310;2311;2312;2313;2314;2315;2316;2317;2318;2319;2320
YFHDINEKIPMHESVLHENFLR	ADRIQLTDQQRVGVKYFHDINEKIPMHESV	KIPMHESVLHENFLRESVQARLTSDYEIQV	K	Y	F	L	R	E	0	1	2	1	0	0	3	0	3	2	2	1	1	2	1	1	0	0	1	1	0	0	22	1	2767.35	RNC61524.1DNApolymerasebeta[Trypanosomacruzi]	RNC61524.1DNApolymerasebeta[Trypanosomacruzi]	146	167	yes	yes	2;3;4;5;6	1.4993e-255	337.43	109100000000			351	37	403;404	2321;2322;2323;2324;2325;2326;2327;2328;2329;2330;2331;2332;2333;2334;2335;2336;2337;2338;2339;2340;2341;2342;2343;2344;2345;2346;2347;2348;2349;2350;2351;2352;2353;2354;2355;2356;2357;2358;2359;2360;2361;2362;2363;2364;2365;2366;2367;2368;2369;2370;2371;2372;2373;2374;2375;2376;2377;2378;2379;2380;2381;2382;2383;2384;2385;2386;2387;2388;2389;2390;2391;2392;2393;2394;2395;2396;2397;2398;2399;2400…
YKVQSYIR	IFKEMADLNNALGEKYKVQSYIRALNSLKT	NNALGEKYKVQSYIRALNSLKTNLDLPLRT	K	Y	K	I	R	A	0	1	0	0	0	1	0	0	0	1	0	1	0	0	0	1	0	0	2	1	0	0	8	1	1055.58	RNC61524.1DNApolymerasebeta[Trypanosomacruzi]	RNC61524.1DNApolymerasebeta[Trypanosomacruzi]	35	42	yes	yes	1;2;3	2.3214e-40	189.62	20808000000			355	37	409	2418;2419;2420;2421;2422;2423;2424;2425;2426;2427;2428;2429;2430;2431;2432
YKVQSYIRALNSLK	IFKEMADLNNALGEKYKVQSYIRALNSLKT	KYKVQSYIRALNSLKTNLDLPLRTVEDLER	K	Y	K	L	K	T	1	1	1	0	0	1	0	0	0	1	2	2	0	0	0	2	0	0	2	1	0	0	14	2	1681.95	RNC61524.1DNApolymerasebeta[Trypanosomacruzi]	RNC61524.1DNApolymerasebeta[Trypanosomacruzi]	35	48	yes	yes	3	0.023368	30.862	20258000			356	37	410	2433
YMGMGRLPPR	ERNYLEATMAQGPLKYMGMGRLPPRTTNGT	QGPLKYMGMGRLPPRTTNGTTKHYKARRVD	K	Y	M	P	R	T	0	2	0	0	0	0	0	2	0	0	1	0	2	0	2	0	0	0	1	0	0	0	10	1	1176.59	RNC61524.1DNApolymerasebeta[Trypanosomacruzi]	RNC61524.1DNApolymerasebeta[Trypanosomacruzi]	243	252	yes	yes	2	0.013028	44.395	0			359	37	413	2436
[truncated: 7 more columns]

## Sheet: Phospho (STY)Sites_CK1
Proteins	Positions within proteins	Leading proteins	Protein	Fasta headers	Localization prob	Score diff	PEP	Score	Delta score	Score for localization	Diagnostic peak	Number of Phospho (STY)	Amino acid	Sequence window	Modification window	Peptide window coverage	Phospho (STY) Probabilities	Phospho (STY) Score diffs	Position in peptide	Charge	Mass error [ppm]	Intensity	Intensity___1	Intensity___2	Intensity___3	Ratio mod/base	Reverse	Potential contaminant	id	Protein group IDs	Positions	Position	Peptide IDs	Mod. peptide IDs	Evidence IDs	MS/MS IDs	Best localization evidence ID	Best localization MS/MS ID	Best localization raw file	Best localization scan number	Best score evidence ID	Best score MS/MS ID	Best score raw file	Best score scan number	Best PEP evidence ID	Best PEP MS/MS ID	Best PEP raw file	Best PEP scan number
RNC61524.1DNApolymerasebeta[Trypanosomacruzi]	46	RNC61524.1DNApolymerasebeta[Trypanosomacruzi]	RNC61524.1DNApolymerasebeta[Trypanosomacruzi]	RNC61524.1 DNA polymerase beta [Trypanosoma cruzi]	0.999976	46.2154	2.29758e-16	155.38	147.1	155.38		1	S	LGEKYKVQSYIRALNSLKTNLDLPLRTVEDL	X;X;X;X;X;X;X;X;X;X;X;X;X;X;X;Phospho (STY);X;X;X;X;X;X;X;X;X;X;X;X;X;X;X	XXXXXXXXXXXXPPPPPPPPPPPPPPXXXXX	ALNS(1)LKTNLDLPLR	ALNS(46)LKT(-46)NLDLPLR	4	2	1.0173	33451000	33451000	0	0	0.0030728			1	37	46	46	25	30	321	509	321	509	ABQ_20230609_CK1	31295	321	509	ABQ_20230609_CK1	31295	321	509	ABQ_20230609_CK1	31295
RNC61524.1DNApolymerasebeta[Trypanosomacruzi]	336	RNC61524.1DNApolymerasebeta[Trypanosomacruzi]	RNC61524.1DNApolymerasebeta[Trypanosomacruzi]	RNC61524.1 DNA polymerase beta [Trypanosoma cruzi]	0.392201	0	1.18174e-07	61.099	59.626	61.099			S	LQERVRANKIAGTKNSPTDAASDPTVEEGVD	X;X;X;X;X;X;X;X;X;X;X;X;X;X;X;Phospho (STY);X;X;X;X;X;X;X;X;Phospho (ST);X;X;X;X;X;X	XXXXXXXXXPPPPPPPPPPPPPPPPPPPPPP	IAGT(0.107)KNS(0.392)PT(0.392)DAAS(0.107)DPT(0.002)VEEGVDPVVSVISGHSAK	IAGT(-5.7)KNS(0)PT(0)DAAS(-5.7)DPT(-22)VEEGVDPVVS(-53)VIS(-58)GHS(-61)AK	7	3	0.50929	0	0	0	0	0			2	37	336	336	122	138			791	1174	ABQ_20230609_CK1	29802	791	1174	ABQ_20230609_CK1	29802	791	1174	ABQ_20230609_CK1	29802
RNC61524.1DNApolymerasebeta[Trypanosomacruzi]	275	RNC61524.1DNApolymerasebeta[Trypanosomacruzi]	RNC61524.1DNApolymerasebeta[Trypanosomacruzi]	RNC61524.1 DNA polymerase beta [Trypanosoma cruzi]	0.999815	37.3294	5.31018e-10	129.37	125.82	129.37		1	S	HYKARRVDIRLIEARSVPTALLTFTGSKNFN	X;X;X;X;X;X;X;X;X;X;X;X;X;X;X;Phospho (STY);X;X;X;X;X;X;X;X;X;X;X;X;X;X;X	XXXXXXXXXXXXXXXPPPPPPPPPPPPPXXX	S(1)VPTALLTFTGSK	S(37)VPT(-37)ALLT(-96)FT(-110)GS(-110)K	1	2	1.475	59972000	59972000	0	0	0.00056517			3	37	275	275	283	326	1984;1985	2860;2861	1985	2861	ABQ_20230609_CK1	41334	1985	2861	ABQ_20230609_CK1	41334	1985	2861	ABQ_20230609_CK1	41334
RNC61524.1DNApolymerasebeta[Trypanosomacruzi]	69	RNC61524.1DNApolymerasebeta[Trypanosomacruzi]	RNC61524.1DNApolymerasebeta[Trypanosomacruzi]	RNC61524.1 DNA polymerase beta [Trypanosoma cruzi]	1	248.767	5.44687e-137	282.52	258.49	282.52		1	S	PLRTVEDLERFPGFGSKLLKKAEEIIMTGKL	X;X;X;X;X;X;X;X;X;X;X;X;X;X;X;Phospho (STY);X;X;X;X;X;X;X;X;X;X;Oxidation (M);X;X;X;X	XXXPPPPPPPPPPPPPPPPPXXXXXXXXXXX	TVEDLERFPGFGS(1)K	T(-250)VEDLERFPGFGS(250)K	13	2	-0.52237	106160000	106160000	0	0	0.0010899			4	37	69	69	314;315	359;361	2196;2197;2202	3318;3319;3320;3330	2196	3318	ABQ_20230609_CK1	29064	2196	3318	ABQ_20230609_CK1	29064	2196	3318	ABQ_20230609_CK1	29064
RNC61524.1DNApolymerasebeta[Trypanosomacruzi]	49	RNC61524.1DNApolymerasebeta[Trypanosomacruzi]	RNC61524.1DNApolymerasebeta[Trypanosomacruzi]	RNC61524.1 DNA polymerase beta [Trypanosoma cruzi]	0.990567	20.2121	4.80451e-05	103.14	99.12	103.14		1	T	KYKVQSYIRALNSLKTNLDLPLRTVEDLERF	X;X;X;X;X;X;X;X;X;X;X;X;X;X;X;Phospho (STY);X;X;X;X;X;X;X;X;X;X;X;X;X;X;X	XXXXXXXXXPPPPPPPPPPPPPPXXXXXXXX	ALNS(0.009)LKT(0.991)NLDLPLR	ALNS(-20)LKT(20)NLDLPLR	7	2	1.1817	14292000	14292000	0	0	0.0013129			8	37	49	49	25	30	320	508	320	508	ABQ_20230609_CK1	28701	320	508	ABQ_20230609_CK1	28701	320	508	ABQ_20230609_CK1	28701
RNC61524.1DNApolymerasebeta[Trypanosomacruzi]	338	RNC61524.1DNApolymerasebeta[Trypanosomacruzi]	RNC61524.1DNApolymerasebeta[Trypanosomacruzi]	RNC61524.1 DNA polymerase beta [Trypanosoma cruzi]	0.392201	0	1.18174e-07	61.099	59.626	61.099			T	ERVRANKIAGTKNSPTDAASDPTVEEGVDPV	X;X;X;X;X;X;X;X;X;X;X;X;X;X;X;X;X;X;X;X;X;X;Phospho (ST);X;X;X;X;X;X;X;X	XXXXXXXXXXXXXXXXXXXXXXXXXXXXXXX	IAGT(0.107)KNS(0.392)PT(0.392)DAAS(0.107)DPT(0.002)VEEGVDPVVSVISGHSAK	IAGT(-5.7)KNS(0)PT(0)DAAS(-5.7)DPT(-22)VEEGVDPVVS(-53)VIS(-58)GHS(-61)AK	9	3	0.50929	0	0	0	0	0			9	37	338	338	122	138			791	1174	ABQ_20230609_CK1	29802	791	1174	ABQ_20230609_CK1	29802	791	1174	ABQ_20230609_CK1	29802
RNC61524.1DNApolymerasebeta[Trypanosomacruzi]	278	RNC61524.1DNApolymerasebeta[Trypanosomacruzi]	RNC61524.1DNApolymerasebeta[Trypanosomacruzi]	RNC61524.1 DNA polymerase beta [Trypanosoma cruzi]	0.996761	25.6879	0.00046103	63.709	54.326	63.709		1	T	ARRVDIRLIEARSVPTALLTFTGSKNFNVIM	X;X;X;X;X;X;X;X;X;X;X;X;X;X;X;Phospho (STY);X;X;X;X;X;X;X;X;X;X;X;X;X;X;Oxidation (M)	XXXXXXXXXXXXPPPPPPPPPPPPPXXXXXX	S(0.003)VPT(0.997)ALLTFTGSK	S(-26)VPT(26)ALLT(-33)FT(-44)GS(-46)K	4	2	1.3843	8988300	8988300	0	0	8.4706e-05			10	37	278	278	283	326	1986	2862	1986	2862	ABQ_20230609_CK1	44469	1986	2862	ABQ_20230609_CK1	44469	1986	2862	ABQ_20230609_CK1	44469
RNC61524.1DNApolymerasebeta[Trypanosomacruzi]	307	RNC61524.1DNApolymerasebeta[Trypanosomacruzi]	RNC61524.1DNApolymerasebeta[Trypanosomacruzi]	RNC61524.1 DNA polymerase beta [Trypanosoma cruzi]	1	69.4757	0.000713988	82.749	72.796	82.749		1	Y	IMRQAAISKGYLLNEYGLFKLGSPEEVKALQ	X;Oxidation (M);X;X;X;X;X;X;X;X;X;X;X;X;X;Phospho (STY);X;X;X;X;X;X;X;X;X;X;X;X;X;X;X	XXXXXXXXXPPPPPPPPPPPXXXXXXXXXXX	GYLLNEY(1)GLFK	GY(-69)LLNEY(69)GLFK	7	2	1.0171	5438000	5438000	0	0	0.0037405			11	37	307	307	109	124	634	967	634	967	ABQ_20230609_CK1	40773	634	967	ABQ_20230609_CK1	40773	634	967	ABQ_20230609_CK1	40773
RNC61524.1DNApolymerasebeta[Trypanosomacruzi]	13	RNC61524.1DNApolymerasebeta[Trypanosomacruzi]	RNC61524.1DNApolymerasebeta[Trypanosomacruzi]	RNC61524.1 DNA polymerase beta [Trypanosoma cruzi]	1	106.258	0.000422038	106.26	90.12	106.26		1	S	___MFRRTFWRFNPDSRENIIRIFKEMADLN	X;X;X;X;X;X;X;X;X;X;X;X;X;X;X;Phospho (ST);X;X;X;X;X;X;X;X;X;X;Oxidation (M);X;X;X;X	XXXXXXXXXXXPPPPPPPPPPPXXXXXXXXX	FNPDS(1)RENIIR	FNPDS(110)RENIIR	5	2	0.42444	29960000	29960000	0	0	0.007868			4	37	13	13	78	91	543	838	543	838	ABQ_20230609_CK1	12345	543	838	ABQ_20230609_CK1	12345	543	838	ABQ_20230609_CK1	12345
RNC61524.1DNApolymerasebeta[Trypanosomacruzi]	185	RNC61524.1DNApolymerasebeta[Trypanosomacruzi]	RNC61524.1DNApolymerasebeta[Trypanosomacruzi]	RNC61524.1 DNA polymerase beta [Trypanosoma cruzi]	1	78.2453	1.06177e-14	97.456	91.485	97.456		1	S	VQARLTSDYEIQVCGSYRRRHPFSGDVDAIL	X;X;X;X;X;X;X;X;X;X;X;X;X;X;X;Phospho (ST);X;X;X;X;X;X;X;Phospho (ST);X;X;X;X;X;X;X	XXXXPPPPPPPPPPPPPPPXXXXXXXXXXXX	LTSDYEIQVCGS(1)YRR	LT(-84)S(-78)DYEIQVCGS(78)YRR	12	2	-4.1226	36816000	36816000	0	0	0.0013716			5	37	185	185	183;184	206;208	1311;1320	1887;1900	1320	1900	ABQ_20230609_CK1	17841	1320	1900	ABQ_20230609_CK1	17841	1320	1900	ABQ_20230609_CK1	17841
RNC61524.1DNApolymerasebeta[Trypanosomacruzi]	193	RNC61524.1DNApolymerasebeta[Trypanosomacruzi]	RNC61524.1DNApolymerasebeta[Trypanosomacruzi]	RNC61524.1 DNA polymerase beta [Trypanosoma cruzi]	1	42.6402	0.00760574	42.64	42.622	42.64			S	YEIQVCGSYRRRHPFSGDVDAILARTLSAPP	X;X;X;X;X;X;X;Phospho (ST);X;X;X;X;X;X;X;Phospho (ST);X;X;X;X;X;X;X;X;X;X;X;X;X;X;X	XXXXXXXXXXXPPPPPPPPPPPPPPXXXXXX	RHPFS(1)GDVDAILAR	RHPFS(43)GDVDAILAR	5	3	0.19314	45676000	45676000	0	0	0.00050242			6	37	193	193	241	283	1824	2612	1824	2612	ABQ_20230609_CK1	20998	1824	2612	ABQ_20230609_CK1	20998	1824	2612	ABQ_20230609_CK1	20998
RNC61524.1DNApolymerasebeta[Trypanosomacruzi]	345	RNC61524.1DNApolymerasebeta[Trypanosomacruzi]	RNC61524.1DNApolymerasebeta[Trypanosomacruzi]	RNC61524.1 DNA polymerase beta [Trypanosoma cruzi]	0.731872	5.23294	2.15779e-05	59.893	57.548	59.893		1	T	IAGTKNSPTDAASDPTVEEGVDPVVSVISGH	X;X;X;X;X;X;Phospho (STY);X;X;X;X;X;X;X;X;Phospho (ST);X;X;X;X;X;X;X;X;X;X;X;X;X;X;X	XXXXXPPPPPPPPPPPPPPPPPPPPPPPPPP	NS(0.001)PT(0.006)DAAS(0.219)DPT(0.732)VEEGVDPVVS(0.022)VIS(0.014)GHS(0.006)AK	NS(-31)PT(-21)DAAS(-5.2)DPT(5.2)VEEGVDPVVS(-15)VIS(-17)GHS(-21)AK	11	3	-0.30665	21971000	21971000	0	0	0.00072842			11	37	345	345	214	247	1629	2362	1629	2362	ABQ_20230609_CK1	31672	1629	2362	ABQ_20230609_CK1	31672	1629	2362	ABQ_20230609_CK1	31672
RNC61524.1DNApolymerasebeta[Trypanosomacruzi]	382	RNC61524.1DNApolymerasebeta[Trypanosomacruzi]	RNC61524.1DNApolymerasebeta[Trypanosomacruzi]	RNC61524.1 DNA polymerase beta [Trypanosoma cruzi]	1	51.6448	0.00119521	51.645	49.739	51.645		1	T	LGLTKEELEVKRVHVTCEKDVFDVLGMPFAK	X;X;X;X;X;X;X;X;X;X;X;X;X;X;X;Phospho (ST);X;X;X;X;X;X;X;X;X;X;Oxidation (M);X;X;X;X	XXXXXXXXXXXXPPPPPPPPPPPPPPPPPPP	VHVT(1)CEKDVFDVLGMPFAKPENR	VHVT(52)CEKDVFDVLGMPFAKPENR	4	3	-2.7734	55360000	55360000	0	0	0.0051908			12	37	382	382	326	375	2241;2242	3376;3377;3378	2242	3378	ABQ_20230609_CK1	33465	2242	3378	ABQ_20230609_CK1	33465	2242	3378	ABQ_20230609_CK1	33465

## Sheet: proteinGroups_CK2
Protein IDs	Majority protein IDs	Peptide counts (all)	Peptide counts (razor+unique)	Peptide counts (unique)	Fasta headers	Number of proteins	Peptides	Razor + unique peptides	Unique peptides	Sequence coverage [%]	Unique + razor sequence coverage [%]	Unique sequence coverage [%]	Mol. weight [kDa]	Sequence length	Sequence lengths	Q-value	Score	Intensity	MS/MS count	Only identified by site	Reverse	Potential contaminant	id	Peptide IDs	Peptide is razor	Mod. peptide IDs	Evidence IDs	MS/MS IDs	Best MS/MS	Oxidation (M) site IDs	Phospho (ST) site IDs	Phospho (STY) site IDs	Oxidation (M) site positions	Phospho (ST) site positions	Phospho (STY) site positions	Taxonomy IDs
RNC61524.1DNApolymerasebeta[Trypanosomacruzi]	RNC61524.1DNApolymerasebeta[Trypanosomacruzi]	80	80	80	RNC61524.1 DNA polymerase beta [Trypanosoma cruzi]	1	80	80	80	93.3	93.3	93.3	45.567	403	403	0	323.31	1562700000000	1952				32	0;1;2;6;10;11;12;17;18;19;24;39;40;41;44;45;46;47;53;54;55;56;67;68;69;70;95;96;105;108;111;112;119;120;122;123;127;128;141;146;147;148;149;150;158;159;162;163;164;170;181;182;183;188;189;192;206;210;211;212;241;242;243;250;262;265;266;267;272;273;274;278;282;283;284;285;295;306;307;310	True;True;True;True;True;True;True;True;True;True;True;True;True;True;True;True;True;True;True;True;True;True;True;True;True;True;True;True;True;True;True;True;True;True;True;True;True;True;True;True;True;True;True;True;True;True;True;True;True;True;True;True;True;True;True;True;True;True;True;True;True;True;True;True;True;True;True;True;True;True;True;True;True;True;True;True;True;True;True;True	0;1;2;7;11;12;13;14;15;16;21;22;23;28;43;44;45;46;47;48;52;53;54;55;61;62;63;64;65;66;67;68;79;80;81;82;107;108;117;120;123;124;125;126;134;135;136;138;139;143;144;145;146;159;164;165;166;167;168;176;177;180;181;182;183;184;191;192;203;204;205;206;207;214;215;216;217;220;234;238;239;240;269;270;271;272;273;280;292;295;296;297;302;303;304;305;309;313;314;315;316;317;318;319;320;331;343;344;345;349	0;1;2;3;4;5;6;7;8;9;10;11;12;13;14;15;16;17;18;19;20;21;22;23;24;25;26;27;28;29;30;31;32;33;34;35;36;37;38;39;40;41;42;43;44;45;46;47;48;49;50;51;52;53;54;55;56;57;58;59;60;61;62;63;64;65;66;67;68;69;70;71;72;73;74;75;76;77;78;79;80;81;82;83;84;85;86;87;88;89;90;91;92;93;94;95;96;97;98;99;100;101;102;103;104;105;106;107;108;109;110;111;112;113;114;115;116;117;118;119;120;121;122;123;124;125;126;1…	0;1;2;3;4;5;6;7;8;9;10;11;12;13;14;15;16;17;18;19;20;21;22;23;24;25;26;27;28;29;30;31;32;33;34;35;36;37;38;39;40;41;42;43;44;45;46;47;48;49;50;51;52;53;54;55;56;57;58;59;60;61;62;63;64;65;66;67;68;69;70;71;72;73;74;75;76;77;78;79;80;81;82;83;84;85;86;87;88;89;90;91;92;93;94;95;96;97;98;99;100;101;102;103;104;105;106;107;108;109;110;111;112;113;114;115;116;117;118;119;120;121;122;123;124;125;126;1…	26;78;183;244;252;258;266;350;378;380;390;421;426;440;449;490;533;544;561;579;582;585;610;614;625;626;718;725;757;850;885;908;981;983;1003;1013;1026;1045;1071;1096;1098;1100;1103;1111;1207;1231;1237;1264;1300;1451;1486;1526;1529;1587;1606;1617;1649;1675;1696;1698;1899;1916;1919;1929;1950;2054;2075;2077;2082;2225;2271;2284;2290;2294;2303;2316;2330;2343;2388;2442	17;18;19;20;21;22;23;24;25		0;1;4	24;80;156;236;244;246;293;364;393		69;275;382	-1

## Sheet: peptides_CK2
Sequence	N-term cleavage window	C-term cleavage window	Amino acid before	First amino acid	Second amino acid	Second last amino acid	Last amino acid	Amino acid after	A Count	R Count	N Count	D Count	C Count	Q Count	E Count	G Count	H Count	I Count	L Count	K Count	M Count	F Count	P Count	S Count	T Count	W Count	Y Count	V Count	U Count	O Count	Length	Missed cleavages	Mass	Proteins	Leading razor protein	Start position	End position	Unique (Groups)	Unique (Proteins)	Charges	PEP	Score	Intensity	Reverse	Potential contaminant	id	Protein group IDs	Mod. peptide IDs	Evidence IDs
AAAALFDR	KAIQELTQVHGFGPRAAAALFDREGIFTVE	VHGFGPRAAAALFDREGIFTVEELIEKADR	R	A	A	D	R	E	4	1	0	1	0	0	0	0	0	0	1	0	0	1	0	0	0	0	0	0	0	0	8	0	833.44	RNC61524.1DNApolymerasebeta[Trypanosomacruzi]	RNC61524.1DNApolymerasebeta[Trypanosomacruzi]	111	118	yes	yes	1;2	4.0012e-64	186.67	52405000000			0	32	0	0;1;2;3;4;5;6;7;8;9;10;11;12;13;14;15;16;17;18;19;20;21;22;23;24;25;26;27;28;29;30;31;32;33
AAAALFDREGIFTVEELIEK	KAIQELTQVHGFGPRAAAALFDREGIFTVE	FDREGIFTVEELIEKADRIQLTDQQRVGVK	R	A	A	E	K	A	4	1	0	1	0	0	4	1	0	2	2	1	0	2	0	0	1	0	0	1	0	0	20	1	2221.16	RNC61524.1DNApolymerasebeta[Trypanosomacruzi]	RNC61524.1DNApolymerasebeta[Trypanosomacruzi]	111	130	yes	yes	2;3;4	8.715e-186	313.51	16618000000			1	32	1	34;35;36;37;38;39;40;41;42;43;44;45;46;47;48;49;50;51;52;53;54;55;56;57;58;59;60;61;62;63;64;65;66;67;68;69;70;71;72;73;74;75;76;77;78;79;80;81;82;83;84;85;86;87;88;89;90;91;92;93;94;95;96;97;98;99;100;101
AAAALFDREGIFTVEELIEKADR	KAIQELTQVHGFGPRAAAALFDREGIFTVE	EGIFTVEELIEKADRIQLTDQQRVGVKYFH	R	A	A	D	R	I	5	2	0	2	0	0	4	1	0	2	2	1	0	2	0	0	1	0	0	1	0	0	23	2	2563.33	RNC61524.1DNApolymerasebeta[Trypanosomacruzi]	RNC61524.1DNApolymerasebeta[Trypanosomacruzi]	111	133	yes	yes	2;3;4;5	1.6374e-157	285.6	43717000000			2	32	2	102;103;104;105;106;107;108;109;110;111;112;113;114;115;116;117;118;119;120;121;122;123;124;125;126;127;128;129;130;131;132;133;134;135;136;137;138;139;140;141;142;143;144;145;146;147;148;149;150;151;152;153;154;155
ADRIQLTDQQR	FDREGIFTVEELIEKADRIQLTDQQRVGVK	LIEKADRIQLTDQQRVGVKYFHDINEKIPM	K	A	D	Q	R	V	1	2	0	2	0	3	0	0	0	1	1	0	0	0	0	0	1	0	0	0	0	0	11	1	1342.7	RNC61524.1DNApolymerasebeta[Trypanosomacruzi]	RNC61524.1DNApolymerasebeta[Trypanosomacruzi]	131	141	yes	yes	2;3	6.3144e-81	256.48	2771300000			6	32	7	161;162;163
AEEIIMTGK	DLERFPGFGSKLLKKAEEIIMTGKLEELEK	SKLLKKAEEIIMTGKLEELEKKTKPKLKAI	K	A	E	G	K	L	1	0	0	0	0	0	2	1	0	2	0	1	1	0	0	0	1	0	0	0	0	0	9	0	990.506	RNC61524.1DNApolymerasebeta[Trypanosomacruzi]	RNC61524.1DNApolymerasebeta[Trypanosomacruzi]	75	83	yes	yes	1;2	5.1927e-05	140.5	9307700000			10	32	11;12	168;169;170;171;172;173
AEEIIMTGKLEELEK	DLERFPGFGSKLLKKAEEIIMTGKLEELEK	AEEIIMTGKLEELEKKTKPKLKAIQELTQV	K	A	E	E	K	K	1	0	0	0	0	0	5	1	0	2	2	2	1	0	0	0	1	0	0	0	0	0	15	1	1731.9	RNC61524.1DNApolymerasebeta[Trypanosomacruzi]	RNC61524.1DNApolymerasebeta[Trypanosomacruzi]	75	89	yes	yes	2;3	5.1313e-64	229.97	12589000000			11	32	13;14	174;175;176;177;178
AEEIIMTGKLEELEKK	DLERFPGFGSKLLKKAEEIIMTGKLEELEK	EEIIMTGKLEELEKKTKPKLKAIQELTQVH	K	A	E	K	K	T	1	0	0	0	0	0	5	1	0	2	2	3	1	0	0	0	1	0	0	0	0	0	16	2	1859.99	RNC61524.1DNApolymerasebeta[Trypanosomacruzi]	RNC61524.1DNApolymerasebeta[Trypanosomacruzi]	75	90	yes	yes	2;3;4	1.3081e-33	175.15	13216000000			12	32	15;16	179;180;181;182
AIQELTQVHGFGPR	GKLEELEKKTKPKLKAIQELTQVHGFGPRA	KAIQELTQVHGFGPRAAAALFDREGIFTVE	K	A	I	P	R	A	1	1	0	0	0	2	1	2	1	1	1	0	0	1	1	0	1	0	0	1	0	0	14	0	1551.82	RNC61524.1DNApolymerasebeta[Trypanosomacruzi]	RNC61524.1DNApolymerasebeta[Trypanosomacruzi]	97	110	yes	yes	2;3;4	1.0061e-221	304.57	92363000000			17	32	21	187;188;189;190;191;192;193;194;195;196;197;198;199;200;201;202;203;204;205;206;207;208;209;210;211;212;213;214;215;216;217;218;219;220;221;222;223;224;225;226;227;228;229;230;231;232;233;234;235;236;237;238;239;240;241;242;243;244;245;246;247;248;249;250;251;252;253;254;255;256;257;258
AIQELTQVHGFGPRAAAALFDR	GKLEELEKKTKPKLKAIQELTQVHGFGPRA	VHGFGPRAAAALFDREGIFTVEELIEKADR	K	A	I	D	R	E	5	2	0	1	0	2	1	2	1	1	2	0	0	2	1	0	1	0	0	1	0	0	22	1	2367.24	RNC61524.1DNApolymerasebeta[Trypanosomacruzi]	RNC61524.1DNApolymerasebeta[Trypanosomacruzi]	97	118	yes	yes	2;3;4	2.9766e-55	175.85	232640000			18	32	22	259;260;261
AIQELTQVHGFGPRAAAALFDREGIFTVEELIEK	GKLEELEKKTKPKLKAIQELTQVHGFGPRA	FDREGIFTVEELIEKADRIQLTDQQRVGVK	K	A	I	E	K	A	5	2	0	1	0	2	5	3	1	3	3	1	0	3	1	0	2	0	0	2	0	0	34	2	3754.97	RNC61524.1DNApolymerasebeta[Trypanosomacruzi]	RNC61524.1DNApolymerasebeta[Trypanosomacruzi]	97	130	yes	yes	3	4.353e-17	77.733	7669100			19	32	23	262
ALNSLKTNLDLPLR	NNALGEKYKVQSYIRALNSLKTNLDLPLRT	RALNSLKTNLDLPLRTVEDLERFPGFGSKL	R	A	L	L	R	T	1	1	2	1	0	0	0	0	0	0	5	1	0	0	1	1	1	0	0	0	0	0	14	1	1566.91	RNC61524.1DNApolymerasebeta[Trypanosomacruzi]	RNC61524.1DNApolymerasebeta[Trypanosomacruzi]	43	56	yes	yes	2;3;4	4.0868e-61	218.75	13298000000			24	32	28	267;268;269;270;271;272;273
DVFDVLGMPFAK	KEELEVKRVHVTCEKDVFDVLGMPFAKPEN	CEKDVFDVLGMPFAKPENRDP_________	K	D	V	A	K	P	1	0	0	2	0	0	0	1	0	0	1	1	1	2	1	0	0	0	0	2	0	0	12	0	1337.67	RNC61524.1DNApolymerasebeta[Trypanosomacruzi]	RNC61524.1DNApolymerasebeta[Trypanosomacruzi]	386	397	yes	yes	2;3	1.3426e-10	111.61	1105500000			39	32	43;44	294;295;296;297;298
DVFDVLGMPFAKPENR	KEELEVKRVHVTCEKDVFDVLGMPFAKPEN	VFDVLGMPFAKPENRDP_____________	K	D	V	N	R	D	1	1	1	2	0	0	1	1	0	0	1	1	1	2	2	0	0	0	0	2	0	0	16	1	1833.91	RNC61524.1DNApolymerasebeta[Trypanosomacruzi]	RNC61524.1DNApolymerasebeta[Trypanosomacruzi]	386	401	yes	yes	2;3;4	9.7495e-40	185.27	16600000000			40	32	45;46	299;300;301;302;303;304;305;306;307;308;309;310
DVFDVLGMPFAKPENRDP	KEELEVKRVHVTCEKDVFDVLGMPFAKPEN	DVLGMPFAKPENRDP_______________	K	D	V	D	P	-	1	1	1	3	0	0	1	1	0	0	1	1	1	2	3	0	0	0	0	2	0	0	18	2	2045.99	RNC61524.1DNApolymerasebeta[Trypanosomacruzi]	RNC61524.1DNApolymerasebeta[Trypanosomacruzi]	386	403	yes	yes	2;3	3.6556e-99	189.1	5117300000			41	32	47;48	311;312;313;314;315;316
EELEVKR	ISGHSAKMETLGLTKEELEVKRVHVTCEKD	METLGLTKEELEVKRVHVTCEKDVFDVLGM	K	E	E	K	R	V	0	1	0	0	0	0	3	0	0	0	1	1	0	0	0	0	0	0	0	1	0	0	7	1	901.487	RNC61524.1DNApolymerasebeta[Trypanosomacruzi]	RNC61524.1DNApolymerasebeta[Trypanosomacruzi]	372	378	yes	yes	1;2	6.6185e-14	191.03	15669000000			44	32	52	320;321;322;323
EGIFTVEELIEK	VHGFGPRAAAALFDREGIFTVEELIEKADR	FDREGIFTVEELIEKADRIQLTDQQRVGVK	R	E	G	E	K	A	0	0	0	0	0	0	4	1	0	2	1	1	0	1	0	0	1	0	0	1	0	0	12	0	1405.73	RNC61524.1DNApolymerasebeta[Trypanosomacruzi]	RNC61524.1DNApolymerasebeta[Trypanosomacruzi]	119	130	yes	yes	2;3	4.2844e-31	150.61	5353000000			45	32	53	324;325;326;327;328;329;330;331;332;333;334;335;336;337;338;339;340;341;342;343;344;345;346
EGIFTVEELIEKADR	VHGFGPRAAAALFDREGIFTVEELIEKADR	EGIFTVEELIEKADRIQLTDQQRVGVKYFH	R	E	G	D	R	I	1	1	0	1	0	0	4	1	0	2	1	1	0	1	0	0	1	0	0	1	0	0	15	1	1747.9	RNC61524.1DNApolymerasebeta[Trypanosomacruzi]	RNC61524.1DNApolymerasebeta[Trypanosomacruzi]	119	133	yes	yes	2;3	1.3949e-21	133.47	2095000000			46	32	54	347;348;349;350;351;352;353;354;355;356;357;358;359;360;361;362;363;364;365;366;367;368;369;370;371;372;373;374;375;376;377;378;379;380;381
EGIFTVEELIEKADRIQLTDQQR	VHGFGPRAAAALFDREGIFTVEELIEKADR	LIEKADRIQLTDQQRVGVKYFHDINEKIPM	R	E	G	Q	R	V	1	2	0	2	0	3	4	1	0	3	2	1	0	1	0	0	2	0	0	1	0	0	23	2	2730.42	RNC61524.1DNApolymerasebeta[Trypanosomacruzi]	RNC61524.1DNApolymerasebeta[Trypanosomacruzi]	119	141	yes	yes	2;3;4	1.9977e-81	208.27	2477700000			47	32	55	382;383;384;385;386;387;388;389
EMADLNNALGEK	RFNPDSRENIIRIFKEMADLNNALGEKYKV	IFKEMADLNNALGEKYKVQSYIRALNSLKT	K	E	M	E	K	Y	2	0	2	1	0	0	2	1	0	0	2	1	1	0	0	0	0	0	0	0	0	0	12	0	1303.61	RNC61524.1DNApolymerasebeta[Trypanosomacruzi]	RNC61524.1DNApolymerasebeta[Trypanosomacruzi]	23	34	yes	yes	1;2;3	1.5431e-96	266.12	35979000000			53	32	61;62	396;397;398;399;400;401;402;403;404;405;406;407;408;409;410;411;412;413
EMADLNNALGEKYK	RFNPDSRENIIRIFKEMADLNNALGEKYKV	KEMADLNNALGEKYKVQSYIRALNSLKTNL	K	E	M	Y	K	V	2	0	2	1	0	0	2	1	0	0	2	2	1	0	0	0	0	0	1	0	0	0	14	1	1594.77	RNC61524.1DNApolymerasebeta[Trypanosomacruzi]	RNC61524.1DNApolymerasebeta[Trypanosomacruzi]	23	36	yes	yes	2;3	4.723e-50	215.46	1363300000			54	32	63;64	414;415;416
EMADLNNALGEKYKVQSYIR	RFNPDSRENIIRIFKEMADLNNALGEKYKV	NNALGEKYKVQSYIRALNSLKTNLDLPLRT	K	E	M	I	R	A	2	1	2	1	0	1	2	1	0	1	2	2	1	0	0	1	0	0	2	1	0	0	20	2	2341.17	RNC61524.1DNApolymerasebeta[Trypanosomacruzi]	RNC61524.1DNApolymerasebeta[Trypanosomacruzi]	23	42	yes	yes	2;3;4	4.0163e-50	180.78	212820000			55	32	65;66	417;418;419
ENIIRIFKEMADLNNALGEK	______________________________	IFKEMADLNNALGEKYKVQSYIRALNSLKT	R	E	N	E	K	Y	2	1	3	1	0	0	3	1	0	3	2	2	1	1	0	0	0	0	0	0	0	0	20	2	2317.21	RNC61524.1DNApolymerasebeta[Trypanosomacruzi]	RNC61524.1DNApolymerasebeta[Trypanosomacruzi]	15	34	yes	yes	2;3;4	2.5004e-17	100.19	36407000			56	32	67;68	420;421;422;423
FNPDSRENIIR	______________________________	TFWRFNPDSRENIIRIFKEMADLNNALGEK	R	F	N	I	R	I	0	2	2	1	0	0	1	0	0	2	0	0	0	1	1	1	0	0	0	0	0	0	11	1	1359.69	RNC61524.1DNApolymerasebeta[Trypanosomacruzi]	RNC61524.1DNApolymerasebeta[Trypanosomacruzi]	9	19	yes	yes	1;2;3	7.023e-40	134.25	1701500000			67	32	79	439;440;441;442;443
FPGFGSK	TNLDLPLRTVEDLERFPGFGSKLLKKAEEI	RTVEDLERFPGFGSKLLKKAEEIIMTGKLE	R	F	P	S	K	L	0	0	0	0	0	0	0	2	0	0	0	1	0	2	1	1	0	0	0	0	0	0	7	0	738.37	RNC61524.1DNApolymerasebeta[Trypanosomacruzi]	RNC61524.1DNApolymerasebeta[Trypanosomacruzi]	64	70	yes	yes	1;2	0.00020421	114.72	33556000000			68	32	80	444;445;446;447;448
FPGFGSKLLK	TNLDLPLRTVEDLERFPGFGSKLLKKAEEI	EDLERFPGFGSKLLKKAEEIIMTGKLEELE	R	F	P	L	K	K	0	0	0	0	0	0	0	2	0	0	2	2	0	2	1	1	0	0	0	0	0	0	10	1	1092.63	RNC61524.1DNApolymerasebeta[Trypanosomacruzi]	RNC61524.1DNApolymerasebeta[Trypanosomacruzi]	64	73	yes	yes	3	0.0026854	82.008	968110000			69	32	81	449
FPGFGSKLLKK	TNLDLPLRTVEDLERFPGFGSKLLKKAEEI	DLERFPGFGSKLLKKAEEIIMTGKLEELEK	R	F	P	K	K	A	0	0	0	0	0	0	0	2	0	0	2	3	0	2	1	1	0	0	0	0	0	0	11	2	1220.73	RNC61524.1DNApolymerasebeta[Trypanosomacruzi]	RNC61524.1DNApolymerasebeta[Trypanosomacruzi]	64	74	yes	yes	3	0.0003638	78.342	58005000			70	32	82	450
GYLLNEYGLFK	SKNFNVIMRQAAISKGYLLNEYGLFKLGSP	AISKGYLLNEYGLFKLGSPEEVKALQERVR	K	G	Y	F	K	L	0	0	1	0	0	0	1	2	0	0	3	1	0	1	0	0	0	0	2	0	0	0	11	0	1315.68	RNC61524.1DNApolymerasebeta[Trypanosomacruzi]	RNC61524.1DNApolymerasebeta[Trypanosomacruzi]	301	311	yes	yes	1;2;3	4.0379e-52	148.52	892800000			95	32	107	479;480;481;482;483;484;485;486;487;488;489;490;491;492;493;494;495;496;497;498;499;500;501;502;503;504;505;506;507;508;509;510;511;512;513;514;515;516;517;518;519;520;521;522;523;524;525;526;527
GYLLNEYGLFKLGSPEEVK	SKNFNVIMRQAAISKGYLLNEYGLFKLGSP	NEYGLFKLGSPEEVKALQERVRANKIAGTK	K	G	Y	V	K	A	0	0	1	0	0	0	3	3	0	0	4	2	0	1	1	1	0	0	2	1	0	0	19	1	2155.12	RNC61524.1DNApolymerasebeta[Trypanosomacruzi]	RNC61524.1DNApolymerasebeta[Trypanosomacruzi]	301	319	yes	yes	2;3	5.9053e-127	272.72	5374600000			96	32	108	528;529;530
HPFSGDVDAILAR	TSDYEIQVCGSYRRRHPFSGDVDAILARTL	RRHPFSGDVDAILARTLSAPPLDCPVTNTG	R	H	P	A	R	T	2	1	0	2	0	0	0	1	1	1	1	0	0	1	1	1	0	0	0	1	0	0	13	0	1396.71	RNC61524.1DNApolymerasebeta[Trypanosomacruzi]	RNC61524.1DNApolymerasebeta[Trypanosomacruzi]	190	202	yes	yes	1;2;3	9.682e-141	291.87	80337000000			105	32	117	544;545;546;547;548;549;550;551;552;553;554;555;556;557;558;559;560;561;562;563;564;565;566;567;568;569;570;571;572;573;574;575;576;577;578;579;580;581;582;583;584;585;586;587;588;589;590;591;592;593;594;595;596;597;598;599;600;601;602;603;604;605;606;607;608;609;610;611;612;613;614;615;616;617;618;619;620;621;622
IAGTKNSPTDAASDPTVEEGVDPVVSVISGHSAK	PEEVKALQERVRANKIAGTKNSPTDAASDP	GVDPVVSVISGHSAKMETLGLTKEELEVKR	K	I	A	A	K	M	4	0	1	3	0	0	2	3	1	2	0	2	0	0	3	5	3	0	0	5	0	0	34	1	3334.65	RNC61524.1DNApolymerasebeta[Trypanosomacruzi]	RNC61524.1DNApolymerasebeta[Trypanosomacruzi]	330	363	yes	yes	3;4	6.3422e-57	136.79	1863900000			108	32	120	626;627;628;629;630;631
IFKEMADLNNALGEK	TFWRFNPDSRENIIRIFKEMADLNNALGEK	IFKEMADLNNALGEKYKVQSYIRALNSLKT	R	I	F	E	K	Y	2	0	2	1	0	0	2	1	0	1	2	2	1	1	0	0	0	0	0	0	0	0	15	1	1691.86	RNC61524.1DNApolymerasebeta[Trypanosomacruzi]	RNC61524.1DNApolymerasebeta[Trypanosomacruzi]	20	34	yes	yes	2;3	9.5594e-288	286.26	37117000000			111	32	123;124	635;636;637;638;639;640;641;642;643;644;645;646;647;648;649;650;651;652;653;654;655;656;657;658;659;660;661;662;663;664;665;666;667;668;669;670;671;672;673;674;675;676;677;678;679;680;681;682;683;684;685
IFKEMADLNNALGEKYK	TFWRFNPDSRENIIRIFKEMADLNNALGEK	KEMADLNNALGEKYKVQSYIRALNSLKTNL	R	I	F	Y	K	V	2	0	2	1	0	0	2	1	0	1	2	3	1	1	0	0	0	0	1	0	0	0	17	2	1983.01	RNC61524.1DNApolymerasebeta[Trypanosomacruzi]	RNC61524.1DNApolymerasebeta[Trypanosomacruzi]	20	36	yes	yes	2;3;4	5.9542e-133	283.1	952200000			112	32	125;126	686;687;688;689
IPMHESVLHENFLR	QQRVGVKYFHDINEKIPMHESVLHENFLRE	KIPMHESVLHENFLRESVQARLTSDYEIQV	K	I	P	L	R	E	0	1	1	0	0	0	2	0	2	1	2	0	1	1	1	1	0	0	0	1	0	0	14	0	1720.87	RNC61524.1DNApolymerasebeta[Trypanosomacruzi]	RNC61524.1DNApolymerasebeta[Trypanosomacruzi]	154	167	yes	yes	2;3;4	1.5526e-89	251.81	90339000000			119	32	134;135	701;702;703;704;705;706;707;708;709;710;711;712;713;714;715;716;717;718;719;720;721;722;723;724;725;726;727;728;729;730;731;732;733;734;735;736;737;738;739;740
IPMHESVLHENFLRESVQAR	QQRVGVKYFHDINEKIPMHESVLHENFLRE	SVLHENFLRESVQARLTSDYEIQVCGSYRR	K	I	P	A	R	L	1	2	1	0	0	1	3	0	2	1	2	0	1	1	1	2	0	0	0	2	0	0	20	1	2391.21	RNC61524.1DNApolymerasebeta[Trypanosomacruzi]	RNC61524.1DNApolymerasebeta[Trypanosomacruzi]	154	173	yes	yes	2;3	5.7774e-34	137.05	117660000			120	32	136	741;742
IQLTDQQR	EGIFTVEELIEKADRIQLTDQQRVGVKYFH	LIEKADRIQLTDQQRVGVKYFHDINEKIPM	R	I	Q	Q	R	V	0	1	0	1	0	3	0	0	0	1	1	0	0	0	0	0	1	0	0	0	0	0	8	0	1000.53	RNC61524.1DNApolymerasebeta[Trypanosomacruzi]	RNC61524.1DNApolymerasebeta[Trypanosomacruzi]	134	141	yes	yes	1;2	1.543e-114	208.54	55680000000			122	32	138	745;746;747;748;749;750;751;752;753;754;755;756;757;758;759;760;761;762;763;764
IQLTDQQRVGVK	EGIFTVEELIEKADRIQLTDQQRVGVKYFH	ADRIQLTDQQRVGVKYFHDINEKIPMHESV	R	I	Q	V	K	Y	0	1	0	1	0	3	0	1	0	1	1	1	0	0	0	0	1	0	0	2	0	0	12	1	1383.78	RNC61524.1DNApolymerasebeta[Trypanosomacruzi]	RNC61524.1DNApolymerasebeta[Trypanosomacruzi]	134	145	yes	yes	2	2.2345e-66	233.84	85358000			123	32	139	765;766
KAEEIIMTGK	EDLERFPGFGSKLLKKAEEIIMTGKLEELE	SKLLKKAEEIIMTGKLEELEKKTKPKLKAI	K	K	A	G	K	L	1	0	0	0	0	0	2	1	0	2	0	2	1	0	0	0	1	0	0	0	0	0	10	1	1118.6	RNC61524.1DNApolymerasebeta[Trypanosomacruzi]	RNC61524.1DNApolymerasebeta[Trypanosomacruzi]	74	83	yes	yes	1;2;3	9.7208e-105	275.28	22487000000			127	32	143;144	771;772;773;774;775;776;777;778;779;780
KAEEIIMTGKLEELEK	EDLERFPGFGSKLLKKAEEIIMTGKLEELE	AEEIIMTGKLEELEKKTKPKLKAIQELTQV	K	K	A	E	K	K	1	0	0	0	0	0	5	1	0	2	2	3	1	0	0	0	1	0	0	0	0	0	16	2	1859.99	RNC61524.1DNApolymerasebeta[Trypanosomacruzi]	RNC61524.1DNApolymerasebeta[Trypanosomacruzi]	74	89	yes	yes	2;3;4	8.333e-273	356.94	48071000000			128	32	145;146	781;782;783;784;785;786;787;788;789;790;791;792;793;794;795;796;797
LEELEKK	SKLLKKAEEIIMTGKLEELEKKTKPKLKAI	EEIIMTGKLEELEKKTKPKLKAIQELTQVH	K	L	E	K	K	T	0	0	0	0	0	0	3	0	0	0	2	2	0	0	0	0	0	0	0	0	0	0	7	1	887.496	RNC61524.1DNApolymerasebeta[Trypanosomacruzi]	RNC61524.1DNApolymerasebeta[Trypanosomacruzi]	84	90	yes	yes	2	0.0093442	107.43	14763000000			141	32	159	816
LGSPEEVK	AISKGYLLNEYGLFKLGSPEEVKALQERVR	NEYGLFKLGSPEEVKALQERVRANKIAGTK	K	L	G	V	K	A	0	0	0	0	0	0	2	1	0	0	1	1	0	0	1	1	0	0	0	1	0	0	8	0	857.449	RNC61524.1DNApolymerasebeta[Trypanosomacruzi]	RNC61524.1DNApolymerasebeta[Trypanosomacruzi]	312	319	yes	yes	1;2	1.9642e-08	127.12	59932000000			146	32	164	823;824;825;826;827;828;829;830;831
LGSPEEVKALQER	AISKGYLLNEYGLFKLGSPEEVKALQERVR	FKLGSPEEVKALQERVRANKIAGTKNSPTD	K	L	G	E	R	V	1	1	0	0	0	1	3	1	0	0	2	1	0	0	1	1	0	0	0	1	0	0	13	1	1454.77	RNC61524.1DNApolymerasebeta[Trypanosomacruzi]	RNC61524.1DNApolymerasebeta[Trypanosomacruzi]	312	324	yes	yes	2;3	3.0712e-61	227.37	3056700000			147	32	165	832;833
LGSPEEVKALQERVR	AISKGYLLNEYGLFKLGSPEEVKALQERVR	LGSPEEVKALQERVRANKIAGTKNSPTDAA	K	L	G	V	R	A	1	2	0	0	0	1	3	1	0	0	2	1	0	0	1	1	0	0	0	2	0	0	15	2	1709.94	RNC61524.1DNApolymerasebeta[Trypanosomacruzi]	RNC61524.1DNApolymerasebeta[Trypanosomacruzi]	312	326	yes	yes	2;3;4	1.1893e-17	116.51	226040000			148	32	166	834;835;836
LIEARSVPTALLTFTGSK	NGTTKHYKARRVDIRLIEARSVPTALLTFT	ARSVPTALLTFTGSKNFNVIMRQAAISKGY	R	L	I	S	K	N	2	1	0	0	0	0	1	1	0	1	3	1	0	1	1	2	3	0	0	1	0	0	18	1	1903.08	RNC61524.1DNApolymerasebeta[Trypanosomacruzi]	RNC61524.1DNApolymerasebeta[Trypanosomacruzi]	270	287	yes	yes	3	7.4805e-17	102.47	314910000			149	32	167	837
LKAIQELTQVHGFGPR	MTGKLEELEKKTKPKLKAIQELTQVHGFGP	KAIQELTQVHGFGPRAAAALFDREGIFTVE	K	L	K	P	R	A	1	1	0	0	0	2	1	2	1	1	2	1	0	1	1	0	1	0	0	1	0	0	16	1	1792.99	RNC61524.1DNApolymerasebeta[Trypanosomacruzi]	RNC61524.1DNApolymerasebeta[Trypanosomacruzi]	95	110	yes	yes	2;3;4	3.3378e-219	335.74	14538000000			150	32	168	838;839;840;841;842;843;844
LTSDYEIQVCGSYR	SVLHENFLRESVQARLTSDYEIQVCGSYRR	RLTSDYEIQVCGSYRRRHPFSGDVDAILAR	R	L	T	Y	R	R	0	1	0	1	1	1	1	1	0	1	1	0	0	0	0	2	1	0	2	1	0	0	14	0	1689.77	RNC61524.1DNApolymerasebeta[Trypanosomacruzi]	RNC61524.1DNApolymerasebeta[Trypanosomacruzi]	174	187	yes	yes	2;3	4.9481e-194	296.65	13470000000			158	32	176	855;856;857;858;859;860;861;862;863;864;865;866;867;868;869;870;871;872;873;874;875;876;877;878;879;880;881;882;883;884;885;886;887;888;889;890;891;892;893;894;895;896;897;898;899;900;901;902;903;904;905;906;907;908;909;910;911;912;913;914;915;916;917;918;919;920
LTSDYEIQVCGSYRR	SVLHENFLRESVQARLTSDYEIQVCGSYRR	LTSDYEIQVCGSYRRRHPFSGDVDAILART	R	L	T	R	R	R	0	2	0	1	1	1	1	1	0	1	1	0	0	0	0	2	1	0	2	1	0	0	15	1	1845.87	RNC61524.1DNApolymerasebeta[Trypanosomacruzi]	RNC61524.1DNApolymerasebeta[Trypanosomacruzi]	174	188	yes	yes	2;3	3.1922e-50	211.46	1456400000			159	32	177	921;922;923
METLGLTK	GVDPVVSVISGHSAKMETLGLTKEELEVKR	ISGHSAKMETLGLTKEELEVKRVHVTCEKD	K	M	E	T	K	E	0	0	0	0	0	0	1	1	0	0	2	1	1	0	0	0	2	0	0	0	0	0	8	0	891.474	RNC61524.1DNApolymerasebeta[Trypanosomacruzi]	RNC61524.1DNApolymerasebeta[Trypanosomacruzi]	364	371	yes	yes	2	0.00044336	117.39	9768600000			162	32	180	926;927;928;929;930
METLGLTKEELEVK	GVDPVVSVISGHSAKMETLGLTKEELEVKR	KMETLGLTKEELEVKRVHVTCEKDVFDVLG	K	M	E	V	K	R	0	0	0	0	0	0	4	1	0	0	3	2	1	0	0	0	2	0	0	1	0	0	14	1	1618.85	RNC61524.1DNApolymerasebeta[Trypanosomacruzi]	RNC61524.1DNApolymerasebeta[Trypanosomacruzi]	364	377	yes	yes	1;2;3	2.6933e-145	299.69	93647000000			163	32	181;182	931;932;933;934;935;936;937;938;939;940;941;942;943;944;945;946;947;948;949;950;951;952
METLGLTKEELEVKR	GVDPVVSVISGHSAKMETLGLTKEELEVKR	METLGLTKEELEVKRVHVTCEKDVFDVLGM	K	M	E	K	R	V	0	1	0	0	0	0	4	1	0	0	3	2	1	0	0	0	2	0	0	1	0	0	15	2	1774.95	RNC61524.1DNApolymerasebeta[Trypanosomacruzi]	RNC61524.1DNApolymerasebeta[Trypanosomacruzi]	364	378	yes	yes	2;3;4	1.1053e-162	301.16	86973000000			164	32	183;184	953;954;955;956;957;958;959;960;961;962;963;964;965;966;967;968;969;970;971;972;973;974;975;976
NFNVIMR	ARSVPTALLTFTGSKNFNVIMRQAAISKGY	LLTFTGSKNFNVIMRQAAISKGYLLNEYGL	K	N	F	M	R	Q	0	1	2	0	0	0	0	0	0	1	0	0	1	1	0	0	0	0	0	1	0	0	7	0	892.459	RNC61524.1DNApolymerasebeta[Trypanosomacruzi]	RNC61524.1DNApolymerasebeta[Trypanosomacruzi]	288	294	yes	yes	1;2	8.8251e-41	159.75	88382000000			170	32	191;192	984;985;986;987;988;989;990;991;992;993;994;995;996;997;998;999;1000;1001;1002;1003;1004;1005;1006;1007;1008;1009;1010;1011;1012;1013;1014;1015;1016;1017;1018;1019;1020;1021;1022;1023;1024;1025;1026;1027;1028;1029;1030;1031;1032;1033;1034;1035;1036;1037;1038;1039;1040;1041;1042;1043;1044;1045;1046;1047;1048;1049;1050;1051;1052;1053;1054;1055;1056;1057;1058;1059;1060;1061;1062;1063;1064;1065;1066;…
NSPTDAASDPTVEEGVDPVVSVISGHSAK	ALQERVRANKIAGTKNSPTDAASDPTVEEG	GVDPVVSVISGHSAKMETLGLTKEELEVKR	K	N	S	A	K	M	3	0	1	3	0	0	2	2	1	1	0	1	0	0	3	5	2	0	0	5	0	0	29	0	2864.37	RNC61524.1DNApolymerasebeta[Trypanosomacruzi]	RNC61524.1DNApolymerasebeta[Trypanosomacruzi]	335	363	yes	yes	2;3;4	5.8093e-210	299.47	7513500000			181	32	203	1094;1095;1096;1097;1098;1099;1100;1101;1102;1103;1104;1105;1106;1107;1108;1109;1110;1111;1112;1113;1114;1115;1116;1117;1118;1119;1120;1121;1122;1123;1124;1125;1126;1127;1128;1129;1130;1131;1132;1133;1134;1135;1136;1137
NSPTDAASDPTVEEGVDPVVSVISGHSAKMETLGLTK	ALQERVRANKIAGTKNSPTDAASDPTVEEG	ISGHSAKMETLGLTKEELEVKRVHVTCEKD	K	N	S	T	K	E	3	0	1	3	0	0	3	3	1	1	2	2	1	0	3	5	4	0	0	5	0	0	37	1	3737.83	RNC61524.1DNApolymerasebeta[Trypanosomacruzi]	RNC61524.1DNApolymerasebeta[Trypanosomacruzi]	335	371	yes	yes	3;4	5.7495e-97	169.13	361460000			182	32	204;205	1138;1139;1140
NSPTDAASDPTVEEGVDPVVSVISGHSAKMETLGLTKEELEVK	ALQERVRANKIAGTKNSPTDAASDPTVEEG	KMETLGLTKEELEVKRVHVTCEKDVFDVLG	K	N	S	V	K	R	3	0	1	3	0	0	6	3	1	1	3	3	1	0	3	5	4	0	0	6	0	0	43	2	4465.21	RNC61524.1DNApolymerasebeta[Trypanosomacruzi]	RNC61524.1DNApolymerasebeta[Trypanosomacruzi]	335	377	yes	yes	3;4;5	1.0266e-63	131.57	453340000			183	32	206;207	1141;1142;1143;1144
NYLEATMAQGPLK	NTGVLGTLVDYLQERNYLEATMAQGPLKYM	ERNYLEATMAQGPLKYMGMGRLPPRTTNGT	R	N	Y	L	K	Y	2	0	1	0	0	1	1	1	0	0	2	1	1	0	1	0	1	0	1	0	0	0	13	0	1434.72	RNC61524.1DNApolymerasebeta[Trypanosomacruzi]	RNC61524.1DNApolymerasebeta[Trypanosomacruzi]	230	242	yes	yes	1;2;3	2.0861e-56	199.67	23525000000			188	32	214;215	1158;1159;1160;1161;1162;1163;1164;1165;1166;1167;1168;1169;1170;1171;1172;1173;1174;1175;1176;1177;1178;1179;1180;1181;1182;1183;1184;1185;1186;1187;1188;1189;1190;1191;1192;1193;1194;1195;1196;1197;1198;1199;1200;1201;1202;1203;1204
NYLEATMAQGPLKYMGMGR	NTGVLGTLVDYLQERNYLEATMAQGPLKYM	ATMAQGPLKYMGMGRLPPRTTNGTTKHYKA	R	N	Y	G	R	L	2	1	1	0	0	1	1	3	0	0	2	1	3	0	1	0	1	0	2	0	0	0	19	1	2130.01	RNC61524.1DNApolymerasebeta[Trypanosomacruzi]	RNC61524.1DNApolymerasebeta[Trypanosomacruzi]	230	248	yes	yes	2;3	1.7254e-24	118.24	932640000			189	32	216;217	1205;1206;1207;1208
QAAISKGYLLNEYGLFK	LLTFTGSKNFNVIMRQAAISKGYLLNEYGL	AISKGYLLNEYGLFKLGSPEEVKALQERVR	R	Q	A	F	K	L	2	0	1	0	0	1	1	2	0	1	3	2	0	1	0	1	0	0	2	0	0	0	17	1	1914.03	RNC61524.1DNApolymerasebeta[Trypanosomacruzi]	RNC61524.1DNApolymerasebeta[Trypanosomacruzi]	295	311	yes	yes	2;3	4.2524e-304	379.86	4871700000			192	32	220	1214;1215
RHPFSGDVDAILAR	LTSDYEIQVCGSYRRRHPFSGDVDAILART	RRHPFSGDVDAILARTLSAPPLDCPVTNTG	R	R	H	A	R	T	2	2	0	2	0	0	0	1	1	1	1	0	0	1	1	1	0	0	0	1	0	0	14	1	1552.81	RNC61524.1DNApolymerasebeta[Trypanosomacruzi]	RNC61524.1DNApolymerasebeta[Trypanosomacruzi]	189	202	yes	yes	2;3;4	1.299e-39	195.94	78027000000			206	32	234	1233;1234;1235;1236;1237;1238;1239;1240;1241;1242;1243;1244;1245;1246;1247;1248;1249;1250;1251;1252;1253;1254;1255;1256
RRHPFSGDVDAILAR	RLTSDYEIQVCGSYRRRHPFSGDVDAILAR	RRHPFSGDVDAILARTLSAPPLDCPVTNTG	R	R	R	A	R	T	2	3	0	2	0	0	0	1	1	1	1	0	0	1	1	1	0	0	0	1	0	0	15	2	1708.91	RNC61524.1DNApolymerasebeta[Trypanosomacruzi]	RNC61524.1DNApolymerasebeta[Trypanosomacruzi]	188	202	yes	yes	2;3;4	3.1964e-124	283.05	24417000000			210	32	238	1260;1261;1262;1263;1264;1265;1266;1267;1268;1269;1270;1271;1272;1273;1274;1275;1276;1277;1278;1279;1280;1281
RVDIRLIEAR	PPRTTNGTTKHYKARRVDIRLIEARSVPTA	HYKARRVDIRLIEARSVPTALLTFTGSKNF	R	R	V	A	R	S	1	3	0	1	0	0	1	0	0	2	1	0	0	0	0	0	0	0	0	1	0	0	10	2	1239.74	RNC61524.1DNApolymerasebeta[Trypanosomacruzi]	RNC61524.1DNApolymerasebeta[Trypanosomacruzi]	265	274	yes	yes	3	4.9527e-06	117.45	72761000			211	32	239	1282
RVHVTCEKDVFDVLGMPFAK	KMETLGLTKEELEVKRVHVTCEKDVFDVLG	CEKDVFDVLGMPFAKPENRDP_________	K	R	V	A	K	P	1	1	0	2	1	0	1	1	1	0	1	2	1	2	1	0	1	0	0	4	0	0	20	2	2347.18	RNC61524.1DNApolymerasebeta[Trypanosomacruzi]	RNC61524.1DNApolymerasebeta[Trypanosomacruzi]	378	397	yes	yes	2;3;4;5	1.0145e-32	133.26	220880000			212	32	240	1283;1284;1285;1286
SVPTALLTFTGSK	HYKARRVDIRLIEARSVPTALLTFTGSKNF	ARSVPTALLTFTGSKNFNVIMRQAAISKGY	R	S	V	S	K	N	1	0	0	0	0	0	0	1	0	0	2	1	0	1	1	2	3	0	0	1	0	0	13	0	1320.73	RNC61524.1DNApolymerasebeta[Trypanosomacruzi]	RNC61524.1DNApolymerasebeta[Trypanosomacruzi]	275	287	yes	yes	2;3	6.5238e-25	156.48	21788000000			241	32	269;270	1330;1331;1332;1333;1334;1335;1336;1337;1338;1339;1340;1341;1342;1343;1344;1345;1346;1347;1348;1349;1350;1351;1352;1353;1354;1355;1356;1357;1358;1359;1360;1361;1362;1363;1364;1365;1366;1367;1368;1369;1370;1371;1372;1373;1374;1375;1376;1377;1378;1379;1380;1381;1382;1383;1384;1385;1386;1387;1388;1389;1390;1391;1392;1393;1394;1395;1396;1397;1398;1399;1400;1401;1402;1403;1404;1405;1406
SVPTALLTFTGSKNFNVIMR	HYKARRVDIRLIEARSVPTALLTFTGSKNF	LLTFTGSKNFNVIMRQAAISKGYLLNEYGL	R	S	V	M	R	Q	1	1	2	0	0	0	0	1	0	1	2	1	1	2	1	2	3	0	0	2	0	0	20	1	2195.18	RNC61524.1DNApolymerasebeta[Trypanosomacruzi]	RNC61524.1DNApolymerasebeta[Trypanosomacruzi]	275	294	yes	yes	2;3;4	2.6182e-110	249.19	3138100000			242	32	271;272	1407;1408;1409;1410;1411;1412;1413;1414;1415;1416
SVPTALLTFTGSKNFNVIMRQAAISK	HYKARRVDIRLIEARSVPTALLTFTGSKNF	SKNFNVIMRQAAISKGYLLNEYGLFKLGSP	R	S	V	S	K	G	3	1	2	0	0	1	0	1	0	2	2	2	1	2	1	3	3	0	0	2	0	0	26	2	2793.52	RNC61524.1DNApolymerasebeta[Trypanosomacruzi]	RNC61524.1DNApolymerasebeta[Trypanosomacruzi]	275	300	yes	yes	4	2.7149e-31	118.01	38865000			243	32	273	1417
TFWRFNPDSR	______________________________	______________________________	R	T	F	S	R	E	0	2	1	1	0	0	0	0	0	0	0	0	0	2	1	1	1	1	0	0	0	0	10	1	1324.63	RNC61524.1DNApolymerasebeta[Trypanosomacruzi]	RNC61524.1DNApolymerasebeta[Trypanosomacruzi]	5	14	yes	yes	3	0.0032758	78.903	19162000			250	32	280	1427
TLSAPPLDCPVTNTGVLGTLVDYLQER	RRHPFSGDVDAILARTLSAPPLDCPVTNTG	NTGVLGTLVDYLQERNYLEATMAQGPLKYM	R	T	L	E	R	N	1	1	1	2	1	1	1	2	0	0	5	0	0	0	3	1	4	0	1	3	0	0	27	0	2928.49	RNC61524.1DNApolymerasebeta[Trypanosomacruzi]	RNC61524.1DNApolymerasebeta[Trypanosomacruzi]	203	229	yes	yes	2	6.6026e-08	60.307	12425000			262	32	292	1446
TNLDLPLR	KYKVQSYIRALNSLKTNLDLPLRTVEDLER	RALNSLKTNLDLPLRTVEDLERFPGFGSKL	K	T	N	L	R	T	0	1	1	1	0	0	0	0	0	0	3	0	0	0	1	0	1	0	0	0	0	0	8	0	940.534	RNC61524.1DNApolymerasebeta[Trypanosomacruzi]	RNC61524.1DNApolymerasebeta[Trypanosomacruzi]	49	56	yes	yes	2	5.7988e-96	211.39	68714000000			265	32	295	1451;1452;1453;1454;1455;1456;1457;1458;1459;1460;1461;1462;1463;1464;1465;1466;1467;1468;1469;1470;1471;1472;1473;1474;1475;1476;1477;1478;1479;1480;1481;1482;1483;1484;1485;1486;1487;1488;1489;1490;1491;1492;1493;1494;1495;1496;1497;1498;1499;1500;1501;1502;1503;1504;1505;1506
TNLDLPLRTVEDLER	KYKVQSYIRALNSLKTNLDLPLRTVEDLER	TNLDLPLRTVEDLERFPGFGSKLLKKAEEI	K	T	N	E	R	F	0	2	1	2	0	0	2	0	0	0	4	0	0	0	1	0	2	0	0	1	0	0	15	1	1782.95	RNC61524.1DNApolymerasebeta[Trypanosomacruzi]	RNC61524.1DNApolymerasebeta[Trypanosomacruzi]	49	63	yes	yes	2;3	1.5196e-22	160.48	305660000			266	32	296	1507;1508;1509
TNLDLPLRTVEDLERFPGFGSK	KYKVQSYIRALNSLKTNLDLPLRTVEDLER	RTVEDLERFPGFGSKLLKKAEEIIMTGKLE	K	T	N	S	K	L	0	2	1	2	0	0	2	2	0	0	4	1	0	2	2	1	2	0	0	1	0	0	22	2	2503.31	RNC61524.1DNApolymerasebeta[Trypanosomacruzi]	RNC61524.1DNApolymerasebeta[Trypanosomacruzi]	49	70	yes	yes	4	0.0017744	52.061	18789000			267	32	297	1510
TVEDLER	RALNSLKTNLDLPLRTVEDLERFPGFGSKL	TNLDLPLRTVEDLERFPGFGSKLLKKAEEI	R	T	V	E	R	F	0	1	0	1	0	0	2	0	0	0	1	0	0	0	0	0	1	0	0	1	0	0	7	0	860.424	RNC61524.1DNApolymerasebeta[Trypanosomacruzi]	RNC61524.1DNApolymerasebeta[Trypanosomacruzi]	57	63	yes	yes	2	0.0010521	115.78	28340000000			272	32	302	1515;1516;1517;1518
TVEDLERFPGFGSK	RALNSLKTNLDLPLRTVEDLERFPGFGSKL	RTVEDLERFPGFGSKLLKKAEEIIMTGKLE	R	T	V	S	K	L	0	1	0	1	0	0	2	2	0	0	1	1	0	2	1	1	1	0	0	1	0	0	14	1	1580.78	RNC61524.1DNApolymerasebeta[Trypanosomacruzi]	RNC61524.1DNApolymerasebeta[Trypanosomacruzi]	57	70	yes	yes	2;3;4	0	339.87	50086000000			273	32	303;304	1519;1520;1521;1522;1523;1524;1525;1526;1527;1528;1529;1530;1531;1532;1533;1534;1535;1536;1537;1538;1539;1540;1541;1542;1543;1544;1545;1546;1547;1548;1549;1550;1551;1552;1553;1554;1555;1556;1557;1558;1559;1560;1561;1562;1563;1564;1565;1566;1567;1568;1569;1570;1571;1572;1573;1574;1575;1576;1577;1578;1579;1580;1581;1582;1583;1584;1585;1586;1587;1588;1589;1590;1591;1592;1593;1594;1595;1596;1597;1598…
TVEDLERFPGFGSKLLK	RALNSLKTNLDLPLRTVEDLERFPGFGSKL	EDLERFPGFGSKLLKKAEEIIMTGKLEELE	R	T	V	L	K	K	0	1	0	1	0	0	2	2	0	0	3	2	0	2	1	1	1	0	0	1	0	0	17	2	1935.05	RNC61524.1DNApolymerasebeta[Trypanosomacruzi]	RNC61524.1DNApolymerasebeta[Trypanosomacruzi]	57	73	yes	yes	2;3;4	1.3148e-24	142.45	4530400000			274	32	305	1628;1629;1630
VDIRLIEAR	PRTTNGTTKHYKARRVDIRLIEARSVPTAL	HYKARRVDIRLIEARSVPTALLTFTGSKNF	R	V	D	A	R	S	1	2	0	1	0	0	1	0	0	2	1	0	0	0	0	0	0	0	0	1	0	0	9	1	1083.64	RNC61524.1DNApolymerasebeta[Trypanosomacruzi]	RNC61524.1DNApolymerasebeta[Trypanosomacruzi]	266	274	yes	yes	3	8.5855e-05	98.048	15117000			278	32	309	1638
VGVKYFHDINEK	LIEKADRIQLTDQQRVGVKYFHDINEKIPM	QQRVGVKYFHDINEKIPMHESVLHENFLRE	R	V	G	E	K	I	0	0	1	1	0	0	1	1	1	1	0	2	0	1	0	0	0	0	1	2	0	0	12	1	1447.75	RNC61524.1DNApolymerasebeta[Trypanosomacruzi]	RNC61524.1DNApolymerasebeta[Trypanosomacruzi]	142	153	yes	yes	2;3;4	1.289e-96	270.61	2826600000			282	32	313	1644;1645;1646
VGVKYFHDINEKIPMHESVLHENFLR	LIEKADRIQLTDQQRVGVKYFHDINEKIPM	KIPMHESVLHENFLRESVQARLTSDYEIQV	R	V	G	L	R	E	0	1	2	1	0	0	3	1	3	2	2	2	1	2	1	1	0	0	1	3	0	0	26	2	3150.61	RNC61524.1DNApolymerasebeta[Trypanosomacruzi]	RNC61524.1DNApolymerasebeta[Trypanosomacruzi]	142	167	yes	yes	3;4;5;6	3.8761e-84	192.18	354420000			283	32	314;315	1647;1648;1649;1650;1651;1652
VHVTCEKDVFDVLGMPFAK	METLGLTKEELEVKRVHVTCEKDVFDVLGM	CEKDVFDVLGMPFAKPENRDP_________	R	V	H	A	K	P	1	0	0	2	1	0	1	1	1	0	1	2	1	2	1	0	1	0	0	4	0	0	19	1	2191.08	RNC61524.1DNApolymerasebeta[Trypanosomacruzi]	RNC61524.1DNApolymerasebeta[Trypanosomacruzi]	379	397	yes	yes	2;3;4	9.2125e-59	203.04	959880000			284	32	316;317	1653;1654;1655;1656;1657;1658
VHVTCEKDVFDVLGMPFAKPENR	METLGLTKEELEVKRVHVTCEKDVFDVLGM	VFDVLGMPFAKPENRDP_____________	R	V	H	N	R	D	1	1	1	2	1	0	2	1	1	0	1	2	1	2	2	0	1	0	0	4	0	0	23	2	2687.32	RNC61524.1DNApolymerasebeta[Trypanosomacruzi]	RNC61524.1DNApolymerasebeta[Trypanosomacruzi]	379	401	yes	yes	2;3;4;5;6	2.3197e-246	330.75	13001000000			285	32	318;319;320	1659;1660;1661;1662;1663;1664;1665;1666;1667;1668
VQSYIRALNSLK	KEMADLNNALGEKYKVQSYIRALNSLKTNL	KYKVQSYIRALNSLKTNLDLPLRTVEDLER	K	V	Q	L	K	T	1	1	1	0	0	1	0	0	0	1	2	1	0	0	0	2	0	0	1	1	0	0	12	1	1390.79	RNC61524.1DNApolymerasebeta[Trypanosomacruzi]	RNC61524.1DNApolymerasebeta[Trypanosomacruzi]	37	48	yes	yes	2	8.3789e-18	164.9	37538000			295	32	331	1680
YFHDINEK	ADRIQLTDQQRVGVKYFHDINEKIPMHESV	QQRVGVKYFHDINEKIPMHESVLHENFLRE	K	Y	F	E	K	I	0	0	1	1	0	0	1	0	1	1	0	1	0	1	0	0	0	0	1	0	0	0	8	0	1064.49	RNC61524.1DNApolymerasebeta[Trypanosomacruzi]	RNC61524.1DNApolymerasebeta[Trypanosomacruzi]	146	153	yes	yes	1;2;3	2.0064e-43	228.45	32426000000			306	32	343	1693;1694;1695;1696;1697;1698;1699;1700;1701;1702;1703;1704;1705;1706;1707;1708;1709;1710;1711;1712;1713;1714;1715;1716
YFHDINEKIPMHESVLHENFLR	ADRIQLTDQQRVGVKYFHDINEKIPMHESV	KIPMHESVLHENFLRESVQARLTSDYEIQV	K	Y	F	L	R	E	0	1	2	1	0	0	3	0	3	2	2	1	1	2	1	1	0	0	1	1	0	0	22	1	2767.35	RNC61524.1DNApolymerasebeta[Trypanosomacruzi]	RNC61524.1DNApolymerasebeta[Trypanosomacruzi]	146	167	yes	yes	2;3;4;5;6	6.2351e-157	275.74	65584000000			307	32	344;345	1717;1718;1719;1720;1721;1722;1723;1724;1725;1726;1727;1728;1729;1730;1731;1732;1733;1734;1735;1736;1737;1738;1739;1740;1741;1742;1743;1744;1745;1746;1747;1748
YKVQSYIR	IFKEMADLNNALGEKYKVQSYIRALNSLKT	NNALGEKYKVQSYIRALNSLKTNLDLPLRT	K	Y	K	I	R	A	0	1	0	0	0	1	0	0	0	1	0	1	0	0	0	1	0	0	2	1	0	0	8	1	1055.58	RNC61524.1DNApolymerasebeta[Trypanosomacruzi]	RNC61524.1DNApolymerasebeta[Trypanosomacruzi]	35	42	yes	yes	1;2;3	1.6923e-43	225.57	21404000000			310	32	349	1753;1754;1755;1756;1757;1758;1759;1760
[truncated: 7 more columns]

## Sheet: Phospho (STY)Sites_CK2
Proteins	Positions within proteins	Leading proteins	Protein	Fasta headers	Localization prob	Score diff	PEP	Score	Delta score	Score for localization	Diagnostic peak	Number of Phospho (STY)	Amino acid	Sequence window	Modification window	Peptide window coverage	Phospho (STY) Probabilities	Phospho (STY) Score diffs	Position in peptide	Charge	Mass error [ppm]	Intensity	Intensity___1	Intensity___2	Intensity___3	Ratio mod/base	Reverse	Potential contaminant	id	Protein group IDs	Positions	Position	Peptide IDs	Mod. peptide IDs	Evidence IDs	MS/MS IDs	Best localization evidence ID	Best localization MS/MS ID	Best localization raw file	Best localization scan number	Best score evidence ID	Best score MS/MS ID	Best score raw file	Best score scan number	Best PEP evidence ID	Best PEP MS/MS ID	Best PEP raw file	Best PEP scan number
RNC61524.1DNApolymerasebeta[Trypanosomacruzi]	275	RNC61524.1DNApolymerasebeta[Trypanosomacruzi]	RNC61524.1DNApolymerasebeta[Trypanosomacruzi]	RNC61524.1 DNA polymerase beta [Trypanosoma cruzi]	0.997962	26.9003	1.14057e-07	83.499	81.592	83.499		1	S	HYKARRVDIRLIEARSVPTALLTFTGSKNFN	X;X;X;X;X;X;X;X;X;X;X;X;X;X;X;Phospho (STY);X;X;X;X;X;X;X;X;X;X;X;X;X;X;X	XXXXXXXXXXXXXXXPPPPPPPPPPPPPXXX	S(0.998)VPT(0.002)ALLTFTGSK	S(27)VPT(-27)ALLT(-68)FT(-75)GS(-72)K	1	2	0.18527	32620000	32620000	0	0	0.0014994			0	32	275	275	241	270	1406	1907	1406	1907	ABQ_20230609_CK2	42934	1406	1907	ABQ_20230609_CK2	42934	1406	1907	ABQ_20230609_CK2	42934
RNC61524.1DNApolymerasebeta[Trypanosomacruzi]	69	RNC61524.1DNApolymerasebeta[Trypanosomacruzi]	RNC61524.1DNApolymerasebeta[Trypanosomacruzi]	RNC61524.1 DNA polymerase beta [Trypanosoma cruzi]	1	119.244	1.22595e-17	146.2	129.53	146.2		1	S	PLRTVEDLERFPGFGSKLLKKAEEIIMTGKL	X;X;X;X;X;X;X;X;X;X;X;X;X;X;X;Phospho (STY);X;X;X;X;X;X;X;X;X;X;Oxidation (M);X;X;X;X	XXXPPPPPPPPPPPPPPXXXXXXXXXXXXXX	TVEDLERFPGFGS(1)K	T(-120)VEDLERFPGFGS(120)K	13	2	-0.83275	14889000	14889000	0	0	0.00029736			1	32	69	69	273	304	1627	2269	1627	2269	ABQ_20230609_CK2	30587	1627	2269	ABQ_20230609_CK2	30587	1627	2269	ABQ_20230609_CK2	30587
RNC61524.1DNApolymerasebeta[Trypanosomacruzi]	382	RNC61524.1DNApolymerasebeta[Trypanosomacruzi]	RNC61524.1DNApolymerasebeta[Trypanosomacruzi]	RNC61524.1 DNA polymerase beta [Trypanosoma cruzi]	1	42.0407	0.00421735	42.041	35.088	42.041		1	T	LGLTKEELEVKRVHVTCEKDVFDVLGMPFAK	X;X;X;X;X;X;X;X;X;X;X;X;X;X;X;Phospho (STY);X;X;X;X;X;X;X;X;X;X;Oxidation (M);X;X;X;X	XXXXXXXXXXXXPPPPPPPPPPPPPPPPPPP	VHVT(1)CEKDVFDVLGMPFAKPENR	VHVT(42)CEKDVFDVLGMPFAKPENR	4	3	-2.2297	0	0	0	0	0			4	32	382	382	285	320	1668	2318	1668	2318	ABQ_20230609_CK2	29738	1668	2318	ABQ_20230609_CK2	29738	1668	2318	ABQ_20230609_CK2	29738

## Sheet: proteinGroups_PCKα
Protein IDs	Majority protein IDs	Peptide counts (all)	Peptide counts (razor+unique)	Peptide counts (unique)	Fasta headers	Number of proteins	Peptides	Razor + unique peptides	Unique peptides	Sequence coverage [%]	Unique + razor sequence coverage [%]	Unique sequence coverage [%]	Mol. weight [kDa]	Sequence length	Sequence lengths	Q-value	Score	Intensity	MS/MS count	Only identified by site	Reverse	Potential contaminant	id	Peptide IDs	Peptide is razor	Mod. peptide IDs	Evidence IDs	MS/MS IDs	Best MS/MS	Oxidation (M) site IDs	Phospho (ST) site IDs	Phospho (STY) site IDs	Oxidation (M) site positions	Phospho (ST) site positions	Phospho (STY) site positions	Taxonomy IDs
RNC61524.1DNApolymerasebeta[Trypanosomacruzi]	RNC61524.1DNApolymerasebeta[Trypanosomacruzi]	87	87	87	RNC61524.1 DNA polymerase beta [Trypanosoma cruzi]	1	87	87	87	97	97	97	45.567	403	403	0	323.31	2230800000000	2543				43	0;1;2;6;10;11;12;17;18;19;23;25;49;50;51;55;56;57;58;66;67;68;69;84;85;86;87;116;117;118;127;133;137;138;147;148;150;151;158;159;172;179;180;181;182;185;188;193;204;205;210;211;212;219;234;235;236;240;241;248;249;267;272;273;274;275;313;314;315;323;335;338;339;340;349;350;351;355;361;362;363;364;373;383;384;387;390	True;True;True;True;True;True;True;True;True;True;True;True;True;True;True;True;True;True;True;True;True;True;True;True;True;True;True;True;True;True;True;True;True;True;True;True;True;True;True;True;True;True;True;True;True;True;True;True;True;True;True;True;True;True;True;True;True;True;True;True;True;True;True;True;True;True;True;True;True;True;True;True;True;True;True;True;True;True;True;True…	0;1;2;7;11;12;13;14;15;16;21;22;23;27;28;31;56;57;58;59;60;61;65;66;67;68;77;78;79;80;81;82;83;84;100;101;102;103;104;133;134;135;136;146;152;156;157;158;159;169;170;171;173;174;181;182;183;184;197;204;205;206;207;210;213;219;230;231;232;237;238;239;240;241;242;252;253;270;271;272;273;279;280;281;282;283;284;291;292;310;315;316;317;318;356;357;358;359;360;368;380;383;384;385;395;396;397;398;403;4…	0;1;2;3;4;5;6;7;8;9;10;11;12;13;14;15;16;17;18;19;20;21;22;23;24;25;26;27;28;29;30;31;32;33;34;35;36;37;38;39;40;41;42;43;44;45;46;47;48;49;50;51;52;53;54;55;56;57;58;59;60;61;62;63;64;65;66;67;68;69;70;71;72;73;74;75;76;77;78;79;80;81;82;83;84;85;86;87;88;89;90;91;92;93;94;95;96;97;98;99;100;101;102;103;104;105;106;107;108;109;110;111;112;113;114;115;116;117;118;119;120;121;122;123;124;125;126;1…	0;1;2;3;4;5;6;7;8;9;10;11;12;13;14;15;16;17;18;19;20;21;22;23;24;25;26;27;28;29;30;31;32;33;34;35;36;37;38;39;40;41;42;43;44;45;46;47;48;49;50;51;52;53;54;55;56;57;58;59;60;61;62;63;64;65;66;67;68;69;70;71;72;73;74;75;76;77;78;79;80;81;82;83;84;85;86;87;88;89;90;91;92;93;94;95;96;97;98;99;100;101;102;103;104;105;106;107;108;109;110;111;112;113;114;115;116;117;118;119;120;121;122;123;124;125;126;1…	12;67;169;276;293;301;304;335;470;471;478;492;540;559;576;584;591;717;725;768;776;778;785;832;849;851;853;897;967;970;989;1140;1146;1269;1384;1403;1417;1477;1500;1519;1543;1557;1579;1583;1587;1599;1628;1634;1655;1755;1778;1791;1871;2018;2128;2129;2131;2223;2249;2261;2262;2295;2327;2354;2355;2357;2473;2587;2591;2602;2624;2645;2757;2762;2785;2806;3006;3022;3029;3039;3044;3059;3074;3128;3137;3222;32…	29;30;31;32;33;34;35;36;37	8;9;12	4;5;6;10;11;12	24;80;156;236;244;246;293;364;393	13;185;382	46;49;69;275;302;382	-1

[truncated: 2 more sheets: peptides_PCKα, Phospho (STY)Sites_PCKα]
